# Supplementary material for: Admixture Analysis Using Genotyping-by-Sequencing Reveals Genetic Relatedness and Parental Lineage Distribution in Highbush Blueberry Genotypes and Cross Derivatives
Source: Int J Mol Sci. 2020 Dec 26;22(1):163. doi: 10.3390/ijms22010163 (PMC7796047; doi:10.3390/ijms22010163)
Supplement: Supplementary file 1 [file ijms-22-00163-s001.xlsx]

## Sheet: Table S1
Table S1. GBS summary of all the blueberry genotypes and BNJ16-5 population
S.NO	Sample_ID	Sample type	Name of the Germplasm	Number of Sequencing Reads with Tag	Total number reads mapped to the Diploid Blueberry genome	Mapping %
1	BB-10	Germplasm	Elizabeth	2953202	2541330	86.0534
2	BB-11	Germplasm	Bonus	3625630	3098810	85.4696
3	BB-12	Germplasm	Nelson	43530	35094	80.6203
4	BB-15	Germplasm	Aurora	3981112	3456049	86.8111
5	BB-16	Germplasm	Pioneer	6301382	5137428	81.5286
6	BB-19	Germplasm	Biloxi	2614628	2170047	82.9964
7	BB-20	Germplasm	Sharpblue	3821082	3348590	87.6346
8	BB-21	Germplasm	Colibri	4269132	3514523	82.3241
9	BB-23	Germplasm	New Hanover	4326364	3661330	84.6283
10	BB-3	Germplasm	Rubel	3469936	2961180	85.3382
11	BB-30	Germplasm	Sunshine blue	2549436	2268851	88.9942
12	BB-31	Germplasm	Misty	3067672	2638652	86.0148
13	BB-32	Germplasm	Bluejay	3016620	2644034	87.6489
14	BB-33	Germplasm	Chandler	1691844	1489170	88.0205
15	BB-34	Germplasm	Darrow	4022426	3517578	87.4492
16	BB-35	Germplasm	Jersey	2211038	1916385	86.6735
17	BB-36	Germplasm	Jubilee	4923186	4164353	84.5865
18	BB-37	Germplasm	Northcountry	4866870	4282049	87.9836
19	BB-38	Germplasm	O'Neal	4552328	3936829	86.4795
20	BB-39	Germplasm	Patriot	2919294	2484205	85.0961
21	BB-4	Germplasm	Chanticleer	1551868	1346012	86.735
22	BB-40	Germplasm	Pink Lemonade	2574080	2201835	85.5387
23	BB-41	Germplasm	Sweetheart	4197846	3635130	86.5951
24	BB-42	Germplasm	Herbert	2829224	2335351	82.5439
25	BB-48	Germplasm	G 751	3150448	2640022	83.7983
26	BB-5	Germplasm	Hannah's Choice	191136	158706	83.033
27	BB-50	Germplasm	Elliotti	2686960	2048046	76.2217
28	BB-53	Germplasm	Bluecrop	3998002	3499497	87.5311
29	BB-54	Germplasm	Duke	2958076	2410589	81.4918
30	BB-55	Germplasm	Legacy	4419236	3440526	77.8534
31	BB-56	Germplasm	Rancocas	3188408	2696342	84.567
32	BB-6	Germplasm	Honey Creek	4671148	4033202	86.3428
33	BB-7	Germplasm	Blueray	3345216	2923630	87.3973
34	NJ88-12-41	Parents		4355446	3796547	87.1678
35	NJ88-14-3	Parents		4356102	3669283	84.2332
36	NJOPB-15	Parents		1724510	1500899	87.0334
37	NJOPB-8	Parents		1813162	1558397	85.9491
38	BNJ05-218-9	F1		2529384	2197649	86.8848
39	BNJ05-237-8	F1		4517078	3884518	85.9963
40	BNJ16-5-1	F2		3500612	3001738	85.7489
41	BNJ16-5-10	F2		2692254	2116599	78.6181
42	BNJ16-5-11	F2		2524218	2188756	86.7103
43	BNJ16-5-12	F2		2908970	2413099	82.9537
44	BNJ16-5-13	F2		4875500	3826867	78.4918
45	BNJ16-5-14	F2		3196652	2243916	70.1958
46	BNJ16-5-15	F2		2082566	1765803	84.7898
47	BNJ16-5-16	F2		4147796	3487191	84.0733
48	BNJ16-5-2	F2		1690338	1389243	82.1873
49	BNJ16-5-3	F2		3607272	3100876	85.9618
50	BNJ16-5-4	F2		3426652	2954735	86.228
51	BNJ16-5-5	F2		3418756	2959535	86.5676
52	BNJ16-5-6	F2		2892584	2412656	83.4083
53	BNJ16-5-7	F2		4147132	3491367	84.1875
54	BNJ16-5-8	F2		1823918	1552217	85.1034
55	BNJ16-5-9	F2		5021268	4139307	82.4355
56	BNJ16-5-17	F2		2655054	2148298	80.9135
57	BNJ16-5-18	F2		3155184	2720319	86.2174
58	BNJ16-5-19	F2		4595550	3918522	85.2677
59	BNJ16-5-20	F2		5264336	3592323	68.2389
60	BNJ16-5-21	F2		3791960	3274557	86.3553
61	BNJ16-5-22	F2		2396746	1992948	83.1522
62	BNJ16-5-23	F2		5068400	4334093	85.5121
63	BNJ16-5-24	F2		5257400	4559048	86.7168
64	BNJ16-5-25	F2		4878366	4219309	86.4902
65	BNJ16-5-26	F2		5992640	4199777	70.0823
66	BNJ16-5-27	F2		841782	699892	83.1441
67	BNJ16-5-28	F2		3591014	3067788	85.4296
68	BNJ16-5-29	F2		3439826	2900885	84.3323
69	BNJ16-5-30	F2		4243854	2994865	70.5695
70	BNJ16-5-31	F2		4314398	3603166	83.5149
71	BNJ16-5-32	F2		3047034	2517871	82.6335
72	BNJ16-5-33	F2		2670546	2243997	84.0276
73	BNJ16-5-34	F2		2865984	2442972	85.2403
74	BNJ16-5-35	F2		2414672	2076151	85.9807
75	BNJ16-5-36	F2		3335018	2839097	85.1299
76	BNJ16-5-37	F2		4157540	3562197	85.6804
77	BNJ16-5-38	F2		2374592	2070518	87.1947
78	BNJ16-5-39	F2		2594208	2137656	82.4011
79	BNJ16-5-40	F2		4886916	4202300	85.9908
80	BNJ16-5-41	F2		2832890	2310164	81.548
81	BNJ16-5-42	F2		3368272	2816213	83.61
82	BNJ16-5-43	F2		2765674	1842746	66.6292
83	BNJ16-5-44	F2		4021650	2902524	72.1725
84	BNJ16-5-45	F2		3875846	3171133	81.8178
85	BNJ16-5-46	F2		2408198	2047296	85.0136
86	BNJ16-5-47	F2		4092516	3473352	84.8708
87	BNJ16-5-48	F2		4387446	1157547	26.3832
88	BNJ16-5-49	F2		3794760	3248819	85.6133
89	BNJ16-5-50	F2		3529528	3009452	85.265
90	BNJ16-5-51	F2		2317932	1971314	85.0462
91	BNJ16-5-52	F2		3431416	2882755	84.0107
92	BNJ16-5-53	F2		4193778	3538361	84.3717
93	BNJ16-5-54	F2		3559316	2760899	77.5682
94	BNJ16-5-55	F2		2388566	2095460	87.7288
95	BNJ16-5-56	F2		2941904	2531007	86.033
96	BNJ16-5-57	F2		3433312	2928391	85.2935
97	BNJ16-5-58	F2		1932160	1632855	84.5093
98	BNJ16-5-59	F2		1863302	1561445	83.7999
99	BNJ16-5-60	F2		5388436	4562081	84.6643
				334600452	277048936	83.1625
				3.3798e+06

## Sheet:  Table S2
Table S2. Details of the SNPs mapped to the longest 12 scaffold sequences of Draper v1.0 genome
CHROM	POSITION	NSAMPLES	NCALLED	HET	HOM-REF	HOM-VAR
VACCDSCAFF1	5542	99	98	33	64	1
VACCDSCAFF1	8941	99	96	41	44	11
VACCDSCAFF1	9163	99	96	24	71	1
VACCDSCAFF1	18840	99	97	10	87	0
VACCDSCAFF1	18965	99	92	23	69	0
VACCDSCAFF1	20981	99	98	11	87	0
VACCDSCAFF1	20992	99	98	43	0	55
VACCDSCAFF1	22968	99	96	11	85	0
VACCDSCAFF1	23145	99	98	40	45	13
VACCDSCAFF1	28597	99	97	34	63	0
VACCDSCAFF1	28618	99	97	76	21	0
VACCDSCAFF1	42236	99	93	29	62	2
VACCDSCAFF1	42278	99	93	54	32	7
VACCDSCAFF1	62842	99	98	10	88	0
VACCDSCAFF1	74677	99	92	42	38	12
VACCDSCAFF1	74821	99	97	50	39	8
VACCDSCAFF1	75340	99	90	22	68	0
VACCDSCAFF1	75348	99	90	22	68	0
VACCDSCAFF1	75630	99	90	20	70	0
VACCDSCAFF1	75631	99	90	21	69	0
VACCDSCAFF1	75786	99	96	17	78	1
VACCDSCAFF1	76713	99	98	37	61	0
VACCDSCAFF1	76815	99	92	14	78	0
VACCDSCAFF1	87313	99	97	29	67	1
VACCDSCAFF1	118099	99	97	37	60	0
VACCDSCAFF1	136684	99	92	38	42	12
VACCDSCAFF1	136819	99	92	26	54	12
VACCDSCAFF1	148192	99	98	64	17	17
VACCDSCAFF1	149150	99	92	29	54	9
VACCDSCAFF1	149195	99	90	25	9	56
VACCDSCAFF1	188575	99	95	35	59	1
VACCDSCAFF1	188586	99	93	28	65	0
VACCDSCAFF1	189073	99	97	34	61	2
VACCDSCAFF1	258848	99	99	41	58	0
VACCDSCAFF1	259065	99	97	61	21	15
VACCDSCAFF1	261419	99	93	42	30	21
VACCDSCAFF1	261752	99	98	42	44	12
VACCDSCAFF1	279189	99	98	44	42	12
VACCDSCAFF1	279203	99	98	41	46	11
VACCDSCAFF1	279232	99	98	49	36	13
VACCDSCAFF1	279502	99	98	54	43	1
VACCDSCAFF1	283338	99	98	22	76	0
VACCDSCAFF1	287732	99	97	39	55	3
VACCDSCAFF1	287742	99	97	55	26	16
VACCDSCAFF1	287868	99	98	56	20	22
VACCDSCAFF1	287882	99	98	18	80	0
VACCDSCAFF1	287883	99	98	10	88	0
VACCDSCAFF1	293825	99	91	31	53	7
VACCDSCAFF1	315569	99	98	42	44	12
VACCDSCAFF1	315570	99	98	42	44	12
VACCDSCAFF1	315592	99	98	63	18	17
VACCDSCAFF1	327538	99	97	63	19	15
VACCDSCAFF1	327547	99	97	64	18	15
VACCDSCAFF1	327570	99	97	61	19	17
VACCDSCAFF1	328589	99	96	60	19	17
VACCDSCAFF1	331055	99	98	56	24	18
VACCDSCAFF1	331056	99	98	41	44	13
VACCDSCAFF1	333919	99	97	59	18	20
VACCDSCAFF1	334140	99	98	35	61	2
VACCDSCAFF1	339107	99	98	10	88	0
VACCDSCAFF1	339268	99	96	12	84	0
VACCDSCAFF1	339280	99	98	21	74	3
VACCDSCAFF1	339310	99	98	62	21	15
VACCDSCAFF1	339390	99	98	63	15	20
VACCDSCAFF1	341835	99	96	36	57	3
VACCDSCAFF1	341865	99	96	22	72	2
VACCDSCAFF1	341948	99	96	55	22	19
VACCDSCAFF1	348484	99	97	42	44	11
VACCDSCAFF1	357575	99	91	15	75	1
VACCDSCAFF1	357623	99	92	47	19	26
VACCDSCAFF1	364012	99	94	44	17	33
VACCDSCAFF1	365241	99	90	36	19	35
VACCDSCAFF1	365242	99	90	40	14	36
VACCDSCAFF1	378245	99	98	38	60	0
VACCDSCAFF1	381247	99	97	11	0	86
VACCDSCAFF1	389170	99	98	22	76	0
VACCDSCAFF1	389365	99	98	24	74	0
VACCDSCAFF1	389383	99	98	59	24	15
VACCDSCAFF1	390644	99	97	50	17	30
VACCDSCAFF1	390650	99	97	41	55	1
VACCDSCAFF1	390662	99	97	58	15	24
VACCDSCAFF1	390723	99	97	37	59	1
VACCDSCAFF1	390741	99	97	23	74	0
VACCDSCAFF1	390763	99	97	23	74	0
VACCDSCAFF1	391025	99	97	41	55	1
VACCDSCAFF1	405852	99	97	19	77	1
VACCDSCAFF1	405887	99	96	47	48	1
VACCDSCAFF1	405890	99	96	43	52	1
VACCDSCAFF1	405989	99	97	49	35	13
VACCDSCAFF1	405992	99	97	49	35	13
VACCDSCAFF1	405997	99	97	20	76	1
VACCDSCAFF1	406022	99	96	40	45	11
VACCDSCAFF1	420346	99	97	62	27	8
VACCDSCAFF1	421305	99	97	40	56	1
VACCDSCAFF1	422702	99	96	27	58	11
VACCDSCAFF1	422803	99	98	47	37	14
VACCDSCAFF1	422920	99	99	49	36	14
VACCDSCAFF1	431621	99	91	22	68	1
VACCDSCAFF1	431628	99	91	48	20	23
VACCDSCAFF1	447351	99	98	60	25	13
VACCDSCAFF1	447360	99	98	38	60	0
VACCDSCAFF1	447534	99	97	42	43	12
VACCDSCAFF1	447552	99	97	48	34	15
VACCDSCAFF1	447609	99	92	31	60	1
VACCDSCAFF1	447622	99	92	52	16	24
VACCDSCAFF1	447804	99	93	54	15	24
VACCDSCAFF1	448467	99	97	40	44	13
VACCDSCAFF1	448498	99	96	58	20	18
VACCDSCAFF1	448568	99	97	53	26	18
VACCDSCAFF1	454010	99	98	40	57	1
VACCDSCAFF1	454053	99	98	68	16	14
VACCDSCAFF1	454065	99	98	38	60	0
VACCDSCAFF1	454077	99	98	27	71	0
VACCDSCAFF1	454086	99	98	70	16	12
VACCDSCAFF1	454106	99	98	66	16	16
VACCDSCAFF1	460980	99	98	36	61	1
VACCDSCAFF1	461067	99	98	63	17	18
VACCDSCAFF1	461174	99	98	23	75	0
VACCDSCAFF1	461205	99	98	22	76	0
VACCDSCAFF1	469835	99	90	17	73	0
VACCDSCAFF1	470001	99	90	17	73	0
VACCDSCAFF1	473320	99	95	39	42	14
VACCDSCAFF1	474618	99	98	38	57	3
VACCDSCAFF1	474623	99	98	52	34	12
VACCDSCAFF1	474639	99	98	58	17	23
VACCDSCAFF1	474743	99	98	42	1	55
VACCDSCAFF1	507557	99	92	44	36	12
VACCDSCAFF1	507608	99	91	44	21	26
VACCDSCAFF1	514192	99	97	41	46	10
VACCDSCAFF1	514349	99	94	33	53	8
VACCDSCAFF1	528602	99	97	62	2	33
VACCDSCAFF1	528782	99	95	55	6	34
VACCDSCAFF1	528791	99	95	46	25	24
VACCDSCAFF1	543343	99	98	30	30	38
VACCDSCAFF1	547502	99	92	22	37	33
VACCDSCAFF1	547522	99	94	60	8	26
VACCDSCAFF1	547587	99	94	11	83	0
VACCDSCAFF1	555018	99	93	13	79	1
VACCDSCAFF1	557115	99	97	38	59	0
VACCDSCAFF1	557119	99	97	38	59	0
VACCDSCAFF1	557187	99	97	38	59	0
VACCDSCAFF1	568037	99	96	27	33	36
VACCDSCAFF1	571599	99	97	39	58	0
VACCDSCAFF1	571608	99	97	52	1	44
VACCDSCAFF1	579108	99	99	27	72	0
VACCDSCAFF1	579120	99	99	53	2	44
VACCDSCAFF1	579126	99	99	53	2	44
VACCDSCAFF1	579147	99	99	53	2	44
VACCDSCAFF1	579157	99	99	39	60	0
VACCDSCAFF1	579175	99	97	53	1	43
VACCDSCAFF1	579180	99	97	27	66	4
VACCDSCAFF1	579189	99	97	41	45	11
VACCDSCAFF1	579202	99	97	54	1	42
VACCDSCAFF1	579203	99	97	54	1	42
VACCDSCAFF1	579213	99	97	27	66	4
VACCDSCAFF1	579227	99	97	53	2	42
VACCDSCAFF1	579249	99	97	54	42	1
VACCDSCAFF1	579291	99	91	36	7	48
VACCDSCAFF1	579311	99	91	36	7	48
VACCDSCAFF1	582122	99	93	40	41	12
VACCDSCAFF1	582161	99	93	27	27	39
VACCDSCAFF1	582170	99	92	28	24	40
VACCDSCAFF1	582295	99	93	28	26	39
VACCDSCAFF1	586726	99	93	25	57	11
VACCDSCAFF1	586745	99	92	26	45	21
VACCDSCAFF1	587613	99	95	7	63	25
VACCDSCAFF1	587658	99	96	28	44	24
VACCDSCAFF1	588572	99	98	30	31	37
VACCDSCAFF1	589966	99	97	42	1	54
VACCDSCAFF1	590014	99	96	22	0	74
VACCDSCAFF1	621946	99	98	21	77	0
VACCDSCAFF1	645134	99	98	40	45	13
VACCDSCAFF1	645201	99	98	59	18	21
VACCDSCAFF1	645211	99	98	26	72	0
VACCDSCAFF1	645223	99	98	39	46	13
VACCDSCAFF1	645253	99	98	39	47	12
VACCDSCAFF1	652812	99	97	63	31	3
VACCDSCAFF1	652814	99	97	27	70	0
VACCDSCAFF1	652821	99	97	39	58	0
VACCDSCAFF1	652845	99	97	41	4	52
VACCDSCAFF1	652846	99	97	30	67	0
VACCDSCAFF1	652848	99	97	38	4	55
VACCDSCAFF1	652865	99	97	21	75	1
VACCDSCAFF1	652875	99	97	40	1	56
VACCDSCAFF1	652902	99	97	41	1	55
VACCDSCAFF1	652913	99	97	42	1	54
VACCDSCAFF1	659179	99	93	23	69	1
VACCDSCAFF1	659211	99	93	42	3	48
VACCDSCAFF1	665820	99	98	47	12	39
VACCDSCAFF1	665966	99	98	67	26	5
VACCDSCAFF1	672394	99	95	13	68	14
VACCDSCAFF1	672404	99	95	20	31	44
VACCDSCAFF1	675746	99	98	55	32	11
VACCDSCAFF1	675795	99	98	66	13	19
VACCDSCAFF1	675804	99	98	50	48	0
VACCDSCAFF1	762708	99	94	40	2	52
VACCDSCAFF1	764255	99	95	56	23	16
VACCDSCAFF1	768769	99	94	56	18	20
VACCDSCAFF1	768774	99	94	39	47	8
VACCDSCAFF1	768877	99	95	41	47	7
VACCDSCAFF1	768899	99	95	42	45	8
VACCDSCAFF1	768900	99	94	19	0	75
VACCDSCAFF1	776377	99	98	40	45	13
VACCDSCAFF1	776385	99	98	61	19	18
VACCDSCAFF1	776393	99	98	23	75	0
VACCDSCAFF1	801617	99	94	25	69	0
VACCDSCAFF1	801639	99	94	25	69	0
VACCDSCAFF1	801647	99	91	24	67	0
VACCDSCAFF1	813070	99	96	44	41	11
VACCDSCAFF1	813193	99	99	55	33	11
VACCDSCAFF1	813194	99	99	62	22	15
VACCDSCAFF1	879825	99	94	57	15	22
VACCDSCAFF1	879854	99	94	33	45	16
VACCDSCAFF1	879982	99	94	56	10	28
VACCDSCAFF1	879988	99	90	44	24	22
VACCDSCAFF1	904420	99	92	33	56	3
VACCDSCAFF1	904433	99	92	35	55	2
VACCDSCAFF1	904435	99	92	33	58	1
VACCDSCAFF1	904576	99	92	29	63	0
VACCDSCAFF1	912990	99	96	50	43	3
VACCDSCAFF1	913094	99	95	38	42	15
VACCDSCAFF1	913097	99	95	19	75	1
VACCDSCAFF1	939993	99	98	42	55	1
VACCDSCAFF1	940000	99	98	72	10	16
VACCDSCAFF1	940017	99	98	64	6	28
VACCDSCAFF1	940022	99	97	32	56	9
VACCDSCAFF1	940074	99	98	42	55	1
VACCDSCAFF1	940075	99	98	42	56	0
VACCDSCAFF1	1009282	99	95	17	75	3
VACCDSCAFF1	1036098	99	96	17	68	11
VACCDSCAFF1	1051218	99	97	26	71	0
VACCDSCAFF1	1051332	99	97	37	2	58
VACCDSCAFF1	1058191	99	96	33	0	63
VACCDSCAFF1	1085762	99	96	13	0	83
VACCDSCAFF1	1085771	99	96	31	65	0
VACCDSCAFF1	1085774	99	96	22	72	2
VACCDSCAFF1	1085784	99	96	22	72	2
VACCDSCAFF1	1085803	99	93	7	55	31
VACCDSCAFF1	1085836	99	92	28	44	20
VACCDSCAFF1	1085843	99	92	27	40	25
VACCDSCAFF1	1093493	99	95	36	58	1
VACCDSCAFF1	1116941	99	97	57	28	12
VACCDSCAFF1	1116955	99	97	37	58	2
VACCDSCAFF1	1116962	99	97	37	58	2
VACCDSCAFF1	1117042	99	97	43	51	3
VACCDSCAFF1	1117064	99	97	36	59	2
VACCDSCAFF1	1117065	99	97	43	52	2
VACCDSCAFF1	1131419	99	98	25	71	2
VACCDSCAFF1	1150339	99	98	24	74	0
VACCDSCAFF1	1150504	99	98	46	38	14
VACCDSCAFF1	1153516	99	97	37	49	11
VACCDSCAFF1	1153531	99	97	55	30	12
VACCDSCAFF1	1153537	99	97	37	48	12
VACCDSCAFF1	1154923	99	96	53	31	12
VACCDSCAFF1	1155036	99	95	39	47	9
VACCDSCAFF1	1168533	99	97	40	54	3
VACCDSCAFF1	1168541	99	97	40	54	3
VACCDSCAFF1	1168653	99	95	18	39	38
VACCDSCAFF1	1168745	99	97	19	52	26
VACCDSCAFF1	1168823	99	97	27	67	3
VACCDSCAFF1	1174039	99	98	39	58	1
VACCDSCAFF1	1174122	99	98	36	39	23
VACCDSCAFF1	1174152	99	98	35	40	23
VACCDSCAFF1	1180329	99	94	40	5	49
VACCDSCAFF1	1180351	99	96	27	66	3
VACCDSCAFF1	1180353	99	96	17	79	0
VACCDSCAFF1	1180363	99	96	37	56	3
VACCDSCAFF1	1180367	99	96	18	78	0
VACCDSCAFF1	1180370	99	96	45	2	49
VACCDSCAFF1	1180401	99	95	20	70	5
VACCDSCAFF1	1180471	99	90	24	55	11
VACCDSCAFF1	1180501	99	93	12	0	81
VACCDSCAFF1	1180506	99	93	26	53	14
VACCDSCAFF1	1180512	99	93	31	54	8
VACCDSCAFF1	1180520	99	93	12	0	81
VACCDSCAFF1	1187486	99	98	55	29	14
VACCDSCAFF1	1187526	99	98	57	26	15
VACCDSCAFF1	1212213	99	98	68	1	29
VACCDSCAFF1	1212880	99	99	12	87	0
VACCDSCAFF1	1212884	99	99	40	59	0
VACCDSCAFF1	1212929	99	99	49	37	13
VACCDSCAFF1	1240842	99	92	34	42	16
VACCDSCAFF1	1256985	99	95	12	72	11
VACCDSCAFF1	1257073	99	97	31	31	35
VACCDSCAFF1	1257080	99	97	41	12	44
VACCDSCAFF1	1282287	99	92	36	3	53
VACCDSCAFF1	1317918	99	97	26	36	35
VACCDSCAFF1	1317941	99	97	33	46	18
VACCDSCAFF1	1317944	99	97	30	50	17
VACCDSCAFF1	1318020	99	90	19	50	21
VACCDSCAFF1	1318624	99	96	32	50	14
VACCDSCAFF1	1318630	99	96	33	20	43
VACCDSCAFF1	1318631	99	96	33	20	43
VACCDSCAFF1	1341031	99	92	25	42	25
VACCDSCAFF1	1353527	99	98	58	40	0
VACCDSCAFF1	1356046	99	90	11	79	0
VACCDSCAFF1	1374089	99	97	47	1	49
VACCDSCAFF1	1374129	99	99	46	53	0
VACCDSCAFF1	1377224	99	95	43	3	49
VACCDSCAFF1	1377233	99	95	44	46	5
VACCDSCAFF1	1377242	99	95	43	49	3
VACCDSCAFF1	1377251	99	95	71	12	12
VACCDSCAFF1	1377252	99	95	13	82	0
VACCDSCAFF1	1377264	99	95	27	65	3
VACCDSCAFF1	1379564	99	97	23	74	0
VACCDSCAFF1	1379602	99	98	21	77	0
VACCDSCAFF1	1385969	99	97	54	28	15
VACCDSCAFF1	1385982	99	97	27	69	1
VACCDSCAFF1	1401093	99	94	32	17	45
VACCDSCAFF1	1419506	99	98	19	77	2
VACCDSCAFF1	1419533	99	98	17	0	81
VACCDSCAFF1	1419551	99	98	22	1	75
VACCDSCAFF1	1419566	99	98	22	1	75
VACCDSCAFF1	1435223	99	96	15	78	3
VACCDSCAFF1	1435298	99	93	15	6	72
VACCDSCAFF1	1444687	99	96	18	78	0
VACCDSCAFF1	1444695	99	96	14	82	0
VACCDSCAFF1	1444703	99	97	55	15	27
VACCDSCAFF1	1444705	99	96	25	71	0
VACCDSCAFF1	1444707	99	96	36	56	4
VACCDSCAFF1	1444757	99	96	40	56	0
VACCDSCAFF1	1444766	99	96	60	23	13
VACCDSCAFF1	1444772	99	96	76	19	1
VACCDSCAFF1	1444783	99	96	64	32	0
VACCDSCAFF1	1444786	99	96	84	9	3
VACCDSCAFF1	1444802	99	96	34	62	0
VACCDSCAFF1	1444814	99	96	27	69	0
VACCDSCAFF1	1444817	99	96	55	40	1
VACCDSCAFF1	1444818	99	96	72	22	2
VACCDSCAFF1	1480724	99	97	43	54	0
VACCDSCAFF1	1480742	99	97	14	83	0
VACCDSCAFF1	1480743	99	97	78	15	4
VACCDSCAFF1	1480745	99	97	55	42	0
VACCDSCAFF1	1480764	99	97	77	16	4
VACCDSCAFF1	1480768	99	97	77	16	4
VACCDSCAFF1	1480770	99	97	49	46	2
VACCDSCAFF1	1480777	99	97	37	60	0
VACCDSCAFF1	1497400	99	98	34	64	0
VACCDSCAFF1	1497416	99	98	59	39	0
VACCDSCAFF1	1497418	99	98	35	63	0
VACCDSCAFF1	1497427	99	98	39	59	0
VACCDSCAFF1	1497439	99	91	33	50	8
VACCDSCAFF1	1497440	99	91	53	9	29
VACCDSCAFF1	1497473	99	95	59	34	2
VACCDSCAFF1	1497485	99	98	37	61	0
VACCDSCAFF1	1497493	99	97	73	24	0
VACCDSCAFF1	1497505	99	97	77	20	0
VACCDSCAFF1	1497506	99	98	88	6	4
VACCDSCAFF1	1497511	99	97	47	50	0
VACCDSCAFF1	1497514	99	98	36	62	0
VACCDSCAFF1	1497520	99	97	69	26	2
VACCDSCAFF1	1497521	99	97	92	1	4
VACCDSCAFF1	1497522	99	98	93	3	2
VACCDSCAFF1	1497553	99	98	26	1	71
VACCDSCAFF1	1497555	99	98	33	65	0
VACCDSCAFF1	1497570	99	98	24	74	0
VACCDSCAFF1	1497576	99	98	63	1	34
VACCDSCAFF1	1497578	99	98	37	61	0
VACCDSCAFF1	1497583	99	98	88	1	9
VACCDSCAFF1	1497584	99	98	82	14	2
VACCDSCAFF1	1497590	99	98	90	7	1
VACCDSCAFF1	1497596	99	98	36	62	0
VACCDSCAFF1	1497597	99	98	35	63	0
VACCDSCAFF1	1497598	99	98	58	31	9
VACCDSCAFF1	1497604	99	98	20	78	0
VACCDSCAFF1	1522721	99	97	65	32	0
VACCDSCAFF1	1522725	99	97	13	84	0
VACCDSCAFF1	1522726	99	98	12	86	0
VACCDSCAFF1	1522732	99	97	24	73	0
VACCDSCAFF1	1522736	99	98	87	3	8
VACCDSCAFF1	1522766	99	97	69	26	2
VACCDSCAFF1	1522769	99	97	21	76	0
VACCDSCAFF1	1522782	99	98	20	78	0
VACCDSCAFF1	1522811	99	98	12	86	0
VACCDSCAFF1	1522813	99	98	38	60	0
VACCDSCAFF1	1522819	99	98	22	76	0
VACCDSCAFF1	1522828	99	97	16	81	0
VACCDSCAFF1	1522837	99	97	46	51	0
VACCDSCAFF1	1522851	99	97	39	58	0
VACCDSCAFF1	1522856	99	97	64	33	0
VACCDSCAFF1	1522885	99	97	74	0	23
VACCDSCAFF1	1522891	99	97	21	0	76
VACCDSCAFF1	1523177	99	90	57	22	11
VACCDSCAFF1	1528910	99	90	40	18	32
VACCDSCAFF1	1535334	99	97	52	43	2
VACCDSCAFF1	1535364	99	97	52	43	2
VACCDSCAFF1	1535496	99	97	52	43	2
VACCDSCAFF1	1535505	99	95	44	49	2
VACCDSCAFF1	1542108	99	91	35	49	7
VACCDSCAFF1	1567678	99	95	14	74	7
VACCDSCAFF1	1567718	99	94	27	59	8
VACCDSCAFF1	1577080	99	93	28	53	12
VACCDSCAFF1	1629579	99	93	34	4	55
VACCDSCAFF1	1629674	99	91	25	2	64
VACCDSCAFF1	1632127	99	98	48	49	1
VACCDSCAFF1	1632171	99	98	43	55	0
VACCDSCAFF1	1632305	99	98	62	14	22
VACCDSCAFF1	1632350	99	97	41	54	2
VACCDSCAFF1	1633150	99	98	70	28	0
VACCDSCAFF1	1633164	99	98	46	52	0
VACCDSCAFF1	1633210	99	98	73	24	1
VACCDSCAFF1	1633220	99	98	48	9	41
VACCDSCAFF1	1633221	99	98	44	54	0
VACCDSCAFF1	1633234	99	98	46	52	0
VACCDSCAFF1	1633322	99	98	23	75	0
VACCDSCAFF1	1649769	99	98	11	44	43
VACCDSCAFF1	1649870	99	96	38	57	1
VACCDSCAFF1	1649980	99	95	21	74	0
VACCDSCAFF1	1650018	99	96	22	71	3
VACCDSCAFF1	1650020	99	96	51	29	16
VACCDSCAFF1	1650044	99	97	22	36	39
VACCDSCAFF1	1650083	99	97	28	67	2
VACCDSCAFF1	1650087	99	97	16	0	81
VACCDSCAFF1	1650092	99	97	39	45	13
VACCDSCAFF1	1650095	99	97	52	32	13
VACCDSCAFF1	1650104	99	97	39	45	13
VACCDSCAFF1	1663279	99	92	33	54	5
VACCDSCAFF1	1663479	99	97	21	76	0
VACCDSCAFF1	1663485	99	97	11	0	86
VACCDSCAFF1	1663581	99	97	21	76	0
VACCDSCAFF1	1663587	99	96	38	56	2
VACCDSCAFF1	1679882	99	97	31	66	0
VACCDSCAFF1	1679966	99	98	45	41	12
VACCDSCAFF1	1679976	99	98	29	69	0
VACCDSCAFF1	1680009	99	98	40	58	0
VACCDSCAFF1	1707045	99	98	32	38	28
VACCDSCAFF1	1707051	99	98	23	8	67
VACCDSCAFF1	1707222	99	97	53	33	11
VACCDSCAFF1	1709343	99	96	33	54	9
VACCDSCAFF1	1709359	99	97	19	69	9
VACCDSCAFF1	1709361	99	97	44	2	51
VACCDSCAFF1	1709370	99	97	20	68	9
VACCDSCAFF1	1736813	99	97	23	74	0
VACCDSCAFF1	1736823	99	97	23	74	0
VACCDSCAFF1	1736835	99	97	23	74	0
VACCDSCAFF1	1736878	99	97	23	74	0
VACCDSCAFF1	1736903	99	97	44	28	25
VACCDSCAFF1	1806071	99	98	48	49	1
VACCDSCAFF1	1806088	99	98	41	57	0
VACCDSCAFF1	1806102	99	98	31	67	0
VACCDSCAFF1	1806126	99	98	51	46	1
VACCDSCAFF1	1806146	99	97	10	75	12
VACCDSCAFF1	1806154	99	97	30	66	1
VACCDSCAFF1	1812028	99	96	53	14	29
VACCDSCAFF1	1812053	99	96	34	58	4
VACCDSCAFF1	1812074	99	96	21	75	0
VACCDSCAFF1	1812081	99	96	22	0	74
VACCDSCAFF1	1812093	99	98	49	48	1
VACCDSCAFF1	1812100	99	98	51	46	1
VACCDSCAFF1	1812127	99	98	54	44	0
VACCDSCAFF1	1830300	99	98	33	62	3
VACCDSCAFF1	1831368	99	99	25	3	71
VACCDSCAFF1	1832321	99	95	19	74	2
VACCDSCAFF1	1832518	99	97	33	63	1
VACCDSCAFF1	1836063	99	98	47	49	2
VACCDSCAFF1	1836088	99	98	47	49	2
VACCDSCAFF1	1836208	99	95	37	52	6
VACCDSCAFF1	1847041	99	97	17	80	0
VACCDSCAFF1	1852788	99	96	28	54	14
VACCDSCAFF1	1869397	99	95	41	42	12
VACCDSCAFF1	1869445	99	96	17	77	2
VACCDSCAFF1	1869454	99	96	22	74	0
VACCDSCAFF1	1882152	99	90	13	0	77
VACCDSCAFF1	1884408	99	98	41	48	9
VACCDSCAFF1	1884573	99	98	34	62	2
VACCDSCAFF1	1885957	99	91	32	43	16
VACCDSCAFF1	1886125	99	92	10	0	82
VACCDSCAFF1	1886134	99	93	43	41	9
VACCDSCAFF1	1886145	99	93	33	46	14
VACCDSCAFF1	1890033	99	97	35	54	8
VACCDSCAFF1	1890125	99	97	48	47	2
VACCDSCAFF1	1893317	99	97	38	45	14
VACCDSCAFF1	1901620	99	98	48	50	0
VACCDSCAFF1	1901642	99	98	49	49	0
VACCDSCAFF1	1901663	99	98	71	15	12
VACCDSCAFF1	1901672	99	98	49	49	0
VACCDSCAFF1	1901685	99	98	48	50	0
VACCDSCAFF1	1901690	99	98	83	3	12
VACCDSCAFF1	1901742	99	97	40	35	22
VACCDSCAFF1	1901775	99	97	32	54	11
VACCDSCAFF1	1901776	99	97	13	65	19
VACCDSCAFF1	1906356	99	95	55	22	18
VACCDSCAFF1	1906370	99	95	52	29	14
VACCDSCAFF1	1906374	99	95	39	51	5
VACCDSCAFF1	1906391	99	95	39	51	5
VACCDSCAFF1	1906399	99	95	42	48	5
VACCDSCAFF1	1911769	99	98	26	63	9
VACCDSCAFF1	1911843	99	98	40	58	0
VACCDSCAFF1	1917656	99	92	15	0	77
VACCDSCAFF1	1925062	99	97	58	25	14
VACCDSCAFF1	1925094	99	97	39	56	2
VACCDSCAFF1	1955214	99	91	39	39	13
VACCDSCAFF1	1955269	99	97	35	0	62
VACCDSCAFF1	1955271	99	97	34	0	63
VACCDSCAFF1	1955277	99	97	49	45	3
VACCDSCAFF1	1963652	99	96	21	75	0
VACCDSCAFF1	1963692	99	98	64	16	18
VACCDSCAFF1	1963796	99	97	45	36	16
VACCDSCAFF1	1963913	99	95	47	31	17
VACCDSCAFF1	1963964	99	95	42	37	16
VACCDSCAFF1	1963982	99	95	42	37	16
VACCDSCAFF1	1964002	99	95	43	36	16
VACCDSCAFF1	1965551	99	97	38	45	14
VACCDSCAFF1	1965662	99	97	42	41	14
VACCDSCAFF1	1990396	99	97	50	34	13
VACCDSCAFF1	1990429	99	98	65	17	16
VACCDSCAFF1	1990435	99	99	66	19	14
VACCDSCAFF1	1990498	99	97	42	14	41
VACCDSCAFF1	1994555	99	99	25	74	0
VACCDSCAFF1	1994584	99	98	36	49	13
VACCDSCAFF1	2010632	99	97	24	73	0
VACCDSCAFF1	2054492	99	98	23	75	0
VACCDSCAFF1	2061898	99	95	32	51	12
VACCDSCAFF1	2061918	99	95	48	23	24
VACCDSCAFF1	2061934	99	95	31	60	4
VACCDSCAFF1	2061935	99	95	46	37	12
VACCDSCAFF1	2061994	99	95	52	36	7
VACCDSCAFF1	2062015	99	95	42	51	2
VACCDSCAFF1	2062042	99	92	16	76	0
VACCDSCAFF1	2062043	99	92	32	57	3
VACCDSCAFF1	2062044	99	94	32	59	3
VACCDSCAFF1	2062052	99	94	34	57	3
VACCDSCAFF1	2062053	99	93	34	56	3
VACCDSCAFF1	2062072	99	96	55	34	7
VACCDSCAFF1	2062203	99	96	21	4	71
VACCDSCAFF1	2063938	99	97	64	15	18
VACCDSCAFF1	2067632	99	98	27	71	0
VACCDSCAFF1	2067658	99	95	27	67	1
VACCDSCAFF1	2143865	99	96	42	53	1
VACCDSCAFF1	2143881	99	96	42	39	15
VACCDSCAFF1	2143883	99	96	45	36	15
VACCDSCAFF1	2143899	99	96	45	36	15
VACCDSCAFF1	2144517	99	97	21	74	2
VACCDSCAFF1	2144536	99	97	42	54	1
VACCDSCAFF1	2144694	99	96	19	13	64
VACCDSCAFF1	2144697	99	96	16	13	67
VACCDSCAFF1	2144718	99	97	42	17	38
VACCDSCAFF1	2145179	99	97	31	66	0
VACCDSCAFF1	2145453	99	97	36	61	0
VACCDSCAFF1	2147062	99	98	25	1	72
VACCDSCAFF1	2147124	99	98	46	15	37
VACCDSCAFF1	2220103	99	91	34	46	11
VACCDSCAFF1	2228184	99	91	39	38	14
VACCDSCAFF1	2228193	99	91	44	20	27
VACCDSCAFF1	2228214	99	91	24	66	1
VACCDSCAFF1	2233161	99	97	41	56	0
VACCDSCAFF1	2274765	99	94	81	8	5
VACCDSCAFF1	2274774	99	94	78	8	8
VACCDSCAFF1	2274790	99	94	30	64	0
VACCDSCAFF1	2274887	99	93	31	57	5
VACCDSCAFF1	2274889	99	94	24	70	0
VACCDSCAFF1	2274893	99	94	55	8	31
VACCDSCAFF1	2274897	99	94	33	60	1
VACCDSCAFF1	2274898	99	94	34	60	0
VACCDSCAFF1	2274907	99	94	36	58	0
VACCDSCAFF1	2274910	99	94	63	0	31
VACCDSCAFF1	2274913	99	94	22	72	0
VACCDSCAFF1	2274926	99	91	37	54	0
VACCDSCAFF1	2276726	99	93	22	71	0
VACCDSCAFF1	2276740	99	98	85	1	12
VACCDSCAFF1	2276746	99	99	72	0	27
VACCDSCAFF1	2276748	99	98	86	1	11
VACCDSCAFF1	2276756	99	99	21	78	0
VACCDSCAFF1	2276769	99	99	14	85	0
VACCDSCAFF1	2276776	99	99	90	1	8
VACCDSCAFF1	2276779	99	99	25	74	0
VACCDSCAFF1	2276785	99	99	90	1	8
VACCDSCAFF1	2276824	99	99	84	7	8
VACCDSCAFF1	2276827	99	98	81	6	11
VACCDSCAFF1	2278309	99	93	5	82	6
VACCDSCAFF1	2278314	99	93	21	58	14
VACCDSCAFF1	2278368	99	97	24	71	2
VACCDSCAFF1	2316480	99	98	65	31	2
VACCDSCAFF1	2316516	99	97	11	86	0
VACCDSCAFF1	2321019	99	98	55	29	14
VACCDSCAFF1	2321071	99	98	45	11	42
VACCDSCAFF1	2321083	99	98	45	11	42
VACCDSCAFF1	2321113	99	98	43	13	42
VACCDSCAFF1	2321134	99	90	17	25	48
VACCDSCAFF1	2321140	99	90	38	36	16
VACCDSCAFF1	2321166	99	90	17	15	58
VACCDSCAFF1	2321359	99	90	27	54	9
VACCDSCAFF1	2324095	99	91	30	31	30
VACCDSCAFF1	2324096	99	91	17	74	0
VACCDSCAFF1	2324194	99	93	19	74	0
VACCDSCAFF1	2324212	99	92	28	63	1
VACCDSCAFF1	2324217	99	93	27	65	1
VACCDSCAFF1	2324223	99	93	43	31	19
VACCDSCAFF1	2324228	99	93	40	33	20
VACCDSCAFF1	2327880	99	99	23	34	42
VACCDSCAFF1	2334908	99	97	21	76	0
VACCDSCAFF1	2334971	99	97	28	69	0
VACCDSCAFF1	2334986	99	97	45	2	50
VACCDSCAFF1	2335000	99	97	33	42	22
VACCDSCAFF1	2361146	99	98	27	71	0
VACCDSCAFF1	2361148	99	98	37	61	0
VACCDSCAFF1	2361150	99	98	19	79	0
VACCDSCAFF1	2361163	99	98	36	62	0
VACCDSCAFF1	2361186	99	98	81	2	15
VACCDSCAFF1	2361197	99	98	62	36	0
VACCDSCAFF1	2361201	99	98	83	15	0
VACCDSCAFF1	2361225	99	98	41	57	0
VACCDSCAFF1	2361232	99	98	16	82	0
VACCDSCAFF1	2367900	99	98	54	44	0
VACCDSCAFF1	2367931	99	98	68	24	6
VACCDSCAFF1	2367936	99	98	49	49	0
VACCDSCAFF1	2367946	99	98	75	8	15
VACCDSCAFF1	2367960	99	98	41	57	0
VACCDSCAFF1	2367962	99	98	22	76	0
VACCDSCAFF1	2367965	99	97	54	39	4
VACCDSCAFF1	2367967	99	97	85	5	7
VACCDSCAFF1	2367981	99	98	80	17	1
VACCDSCAFF1	2367992	99	98	62	36	0
VACCDSCAFF1	2367999	99	98	61	37	0
VACCDSCAFF1	2368009	99	98	57	41	0
VACCDSCAFF1	2368103	99	98	11	0	87
VACCDSCAFF1	2368121	99	98	39	59	0
VACCDSCAFF1	2368153	99	98	43	50	5
VACCDSCAFF1	2397209	99	98	61	37	0
VACCDSCAFF1	2397239	99	97	46	6	45
VACCDSCAFF1	2397263	99	95	21	74	0
VACCDSCAFF1	2411488	99	97	41	54	2
VACCDSCAFF1	2411761	99	97	26	0	71
VACCDSCAFF1	2411771	99	97	23	74	0
VACCDSCAFF1	2412281	99	96	30	66	0
VACCDSCAFF1	2412329	99	97	37	60	0
VACCDSCAFF1	2412334	99	97	39	58	0
VACCDSCAFF1	2412335	99	97	38	59	0
VACCDSCAFF1	2412336	99	97	39	58	0
VACCDSCAFF1	2412540	99	97	24	73	0
VACCDSCAFF1	2412543	99	97	56	0	41
VACCDSCAFF1	2412547	99	96	55	30	11
VACCDSCAFF1	2412549	99	96	47	48	1
VACCDSCAFF1	2412576	99	97	38	57	2
VACCDSCAFF1	2414390	99	92	41	45	6
VACCDSCAFF1	2419880	99	98	39	59	0
VACCDSCAFF1	2419900	99	98	38	60	0
VACCDSCAFF1	2429794	99	94	25	66	3
VACCDSCAFF1	2429810	99	98	33	65	0
VACCDSCAFF1	2429904	99	98	25	73	0
VACCDSCAFF1	2440785	99	99	41	58	0
VACCDSCAFF1	2440799	99	99	74	2	23
VACCDSCAFF1	2440801	99	99	43	56	0
VACCDSCAFF1	2440806	99	99	41	58	0
VACCDSCAFF1	2440813	99	99	73	2	24
VACCDSCAFF1	2440822	99	99	83	2	14
VACCDSCAFF1	2440831	99	99	74	2	23
VACCDSCAFF1	2440873	99	98	69	7	22
VACCDSCAFF1	2455617	99	94	22	71	1
VACCDSCAFF1	2455632	99	95	32	46	17
VACCDSCAFF1	2455645	99	95	32	46	17
VACCDSCAFF1	2456530	99	91	20	1	70
VACCDSCAFF1	2456723	99	92	27	2	63
VACCDSCAFF1	2456726	99	92	22	70	0
VACCDSCAFF1	2475884	99	94	62	30	2
VACCDSCAFF1	2475900	99	95	61	8	26
VACCDSCAFF1	2478082	99	98	47	51	0
VACCDSCAFF1	2478090	99	98	76	14	8
VACCDSCAFF1	2478113	99	98	48	49	1
VACCDSCAFF1	2478127	99	98	74	24	0
VACCDSCAFF1	2478130	99	98	72	24	2
VACCDSCAFF1	2478135	99	98	69	24	5
VACCDSCAFF1	2478268	99	98	53	45	0
VACCDSCAFF1	2478283	99	98	28	70	0
VACCDSCAFF1	2478296	99	98	33	65	0
VACCDSCAFF1	2479347	99	98	13	0	85
VACCDSCAFF1	2479352	99	99	92	4	3
VACCDSCAFF1	2479381	99	97	31	66	0
VACCDSCAFF1	2479493	99	98	31	67	0
VACCDSCAFF1	2479500	99	98	70	28	0
VACCDSCAFF1	2479505	99	98	21	77	0
VACCDSCAFF1	2479514	99	98	89	4	5
VACCDSCAFF1	2479530	99	99	31	68	0
VACCDSCAFF1	2479554	99	98	13	0	85
VACCDSCAFF1	2479576	99	97	10	87	0
VACCDSCAFF1	2479587	99	97	96	0	1
VACCDSCAFF1	2479590	99	97	19	78	0
VACCDSCAFF1	2479598	99	97	96	0	1
VACCDSCAFF1	2479601	99	97	96	0	1
VACCDSCAFF1	2479609	99	97	94	2	1
VACCDSCAFF1	2479614	99	97	12	0	85
VACCDSCAFF1	2539171	99	97	60	17	20
VACCDSCAFF1	2541549	99	97	44	53	0
VACCDSCAFF1	2541608	99	97	63	16	18
VACCDSCAFF1	2543521	99	98	40	44	14
VACCDSCAFF1	2543539	99	98	49	33	16
VACCDSCAFF1	2583272	99	97	35	48	14
VACCDSCAFF1	2592832	99	98	66	32	0
VACCDSCAFF1	2592848	99	98	45	52	1
VACCDSCAFF1	2592862	99	98	76	22	0
VACCDSCAFF1	2592877	99	98	50	48	0
VACCDSCAFF1	2592920	99	90	52	36	2
VACCDSCAFF1	2592928	99	96	56	40	0
VACCDSCAFF1	2592931	99	95	66	29	0
VACCDSCAFF1	2592948	99	96	71	24	1
VACCDSCAFF1	2592957	99	96	66	30	0
VACCDSCAFF1	2592958	99	96	65	31	0
VACCDSCAFF1	2592988	99	96	41	55	0
VACCDSCAFF1	2613535	99	92	37	55	0
VACCDSCAFF1	2613743	99	95	50	17	28
VACCDSCAFF1	2631574	99	96	49	42	5
VACCDSCAFF1	2631600	99	97	49	42	6
VACCDSCAFF1	2795782	99	97	26	70	1
VACCDSCAFF1	2795786	99	97	40	42	15
VACCDSCAFF1	2795796	99	97	21	75	1
VACCDSCAFF1	2795839	99	97	21	75	1
VACCDSCAFF1	2795840	99	97	21	75	1
VACCDSCAFF1	2795845	99	97	12	85	0
VACCDSCAFF1	2795847	99	97	13	84	0
VACCDSCAFF1	2795872	99	97	23	73	1
VACCDSCAFF1	2795874	99	97	40	16	41
VACCDSCAFF1	2795876	99	97	22	75	0
VACCDSCAFF1	2795882	99	97	39	43	15
VACCDSCAFF1	2803496	99	94	25	68	1
VACCDSCAFF1	2803724	99	94	43	48	3
VACCDSCAFF1	2841530	99	90	16	74	0
VACCDSCAFF1	2863298	99	98	40	42	16
VACCDSCAFF1	2863358	99	98	41	41	16
VACCDSCAFF1	2878593	99	97	36	44	17
VACCDSCAFF1	2878600	99	97	52	22	23
VACCDSCAFF1	2878738	99	98	50	27	21
VACCDSCAFF1	2878747	99	98	55	22	21
VACCDSCAFF1	2878750	99	98	55	24	19
VACCDSCAFF1	2878795	99	98	55	22	21
VACCDSCAFF1	2878808	99	97	52	25	20
VACCDSCAFF1	2880089	99	94	23	68	3
VACCDSCAFF1	2880325	99	98	20	75	3
VACCDSCAFF1	2880332	99	97	16	81	0
VACCDSCAFF1	2945453	99	94	31	44	19
VACCDSCAFF1	2945469	99	94	37	10	47
VACCDSCAFF1	2945470	99	94	37	10	47
VACCDSCAFF1	2945489	99	94	38	54	2
VACCDSCAFF1	2965218	99	96	39	13	44
VACCDSCAFF1	2986875	99	92	21	70	1
VACCDSCAFF1	2988714	99	96	17	79	0
VACCDSCAFF1	2988732	99	96	33	62	1
VACCDSCAFF1	2989012	99	96	37	56	3
VACCDSCAFF1	3000820	99	97	79	5	13
VACCDSCAFF1	3000836	99	97	42	55	0
VACCDSCAFF1	3000844	99	97	49	8	40
VACCDSCAFF1	3000861	99	97	42	55	0
VACCDSCAFF1	3000984	99	97	52	42	3
VACCDSCAFF1	3001230	99	91	37	47	7
VACCDSCAFF1	3001261	99	90	58	4	28
VACCDSCAFF1	3021166	99	98	60	38	0
VACCDSCAFF1	3021169	99	98	60	38	0
VACCDSCAFF1	3021292	99	97	46	37	14
VACCDSCAFF1	3021303	99	97	50	32	15
VACCDSCAFF1	3026413	99	99	38	60	1
VACCDSCAFF1	3026524	99	99	37	62	0
VACCDSCAFF1	3028664	99	93	14	78	1
VACCDSCAFF1	3028680	99	94	28	65	1
VACCDSCAFF1	3028689	99	94	38	46	10
VACCDSCAFF1	3028690	99	94	38	46	10
VACCDSCAFF1	3090103	99	97	27	0	70
VACCDSCAFF1	3110687	99	98	25	73	0
VACCDSCAFF1	3110713	99	98	39	59	0
VACCDSCAFF1	3126864	99	98	39	44	15
VACCDSCAFF1	3133647	99	98	23	75	0
VACCDSCAFF1	3133670	99	98	23	75	0
VACCDSCAFF1	3133679	99	96	27	69	0
VACCDSCAFF1	3133680	99	96	41	53	2
VACCDSCAFF1	3133868	99	97	50	46	1
VACCDSCAFF1	3135229	99	95	35	60	0
VACCDSCAFF1	3135378	99	94	18	75	1
VACCDSCAFF1	3135978	99	98	35	63	0
VACCDSCAFF1	3136005	99	98	86	12	0
VACCDSCAFF1	3136006	99	98	89	9	0
VACCDSCAFF1	3136015	99	98	86	12	0
VACCDSCAFF1	3136133	99	97	26	71	0
VACCDSCAFF1	3136152	99	98	85	12	1
VACCDSCAFF1	3136157	99	98	65	31	2
VACCDSCAFF1	3136165	99	98	86	12	0
VACCDSCAFF1	3136182	99	98	72	0	26
VACCDSCAFF1	3136185	99	98	86	12	0
VACCDSCAFF1	3136186	99	98	86	12	0
VACCDSCAFF1	3136197	99	98	51	46	1
VACCDSCAFF1	3137025	99	96	30	30	36
VACCDSCAFF1	3137028	99	95	20	75	0
VACCDSCAFF1	3137047	99	96	41	20	35
VACCDSCAFF1	3137052	99	96	37	20	39
VACCDSCAFF1	3137080	99	96	28	64	4
VACCDSCAFF1	3137205	99	94	34	35	25
VACCDSCAFF1	3137209	99	94	22	72	0
VACCDSCAFF1	3137227	99	95	32	42	21
VACCDSCAFF1	3137239	99	95	36	36	23
VACCDSCAFF1	3198617	99	98	11	87	0
VACCDSCAFF1	3210219	99	97	83	7	7
VACCDSCAFF1	3210228	99	97	82	8	7
VACCDSCAFF1	3210322	99	97	11	0	86
VACCDSCAFF1	3210324	99	97	76	16	5
VACCDSCAFF1	3210372	99	98	51	47	0
VACCDSCAFF1	3210373	99	98	95	1	2
VACCDSCAFF1	3210385	99	97	23	0	74
VACCDSCAFF1	3210390	99	97	10	0	87
VACCDSCAFF1	3210393	99	97	10	87	0
VACCDSCAFF1	3210399	99	97	87	6	4
VACCDSCAFF1	3210418	99	97	84	10	3
VACCDSCAFF1	3211153	99	99	20	79	0
VACCDSCAFF1	3211165	99	99	34	64	1
VACCDSCAFF1	3211222	99	99	13	86	0
VACCDSCAFF1	3226290	99	98	49	49	0
VACCDSCAFF1	3226589	99	96	8	1	87
VACCDSCAFF1	3227417	99	97	35	30	32
VACCDSCAFF1	3276205	99	96	54	27	15
VACCDSCAFF1	3282842	99	99	61	17	21
VACCDSCAFF1	3282889	99	98	58	21	19
VACCDSCAFF1	3318270	99	97	35	50	12
VACCDSCAFF1	3318447	99	96	37	47	12
VACCDSCAFF1	3318463	99	97	51	13	33
VACCDSCAFF1	3318470	99	97	47	17	33
VACCDSCAFF1	3318474	99	96	31	51	14
VACCDSCAFF1	3323539	99	97	54	42	1
VACCDSCAFF1	3335659	99	94	60	26	8
VACCDSCAFF1	3337191	99	99	47	25	27
VACCDSCAFF1	3337205	99	99	48	24	27
VACCDSCAFF1	3340787	99	99	41	58	0
VACCDSCAFF1	3340855	99	98	61	35	2
VACCDSCAFF1	3343506	99	95	20	74	1
VACCDSCAFF1	3343536	99	91	34	34	23
VACCDSCAFF1	3344063	99	98	52	23	23
VACCDSCAFF1	3344065	99	98	57	40	1
VACCDSCAFF1	3344107	99	98	42	56	0
VACCDSCAFF1	3344108	99	98	49	23	26
VACCDSCAFF1	3344118	99	98	49	23	26
VACCDSCAFF1	3344147	99	97	10	87	0
VACCDSCAFF1	3373458	99	96	2	29	65
VACCDSCAFF1	3373459	99	96	2	29	65
VACCDSCAFF1	3486577	99	90	52	9	29
VACCDSCAFF1	3486605	99	90	48	42	0
VACCDSCAFF1	3540954	99	94	42	37	15
VACCDSCAFF1	3540988	99	94	41	39	14
VACCDSCAFF1	3540996	99	94	40	46	8
VACCDSCAFF1	3541002	99	94	42	38	14
VACCDSCAFF1	3541006	99	94	42	37	15
VACCDSCAFF1	3551705	99	96	38	57	1
VACCDSCAFF1	3551715	99	96	36	58	2
VACCDSCAFF1	3551753	99	96	38	56	2
VACCDSCAFF1	3551859	99	98	46	4	48
VACCDSCAFF1	3551873	99	98	32	64	2
VACCDSCAFF1	3551899	99	97	26	71	0
VACCDSCAFF1	3551900	99	98	14	84	0
VACCDSCAFF1	3551906	99	98	47	28	23
VACCDSCAFF1	3627617	99	98	34	47	17
VACCDSCAFF1	3628472	99	90	34	55	1
VACCDSCAFF1	3628614	99	91	32	58	1
VACCDSCAFF1	3633492	99	90	21	40	29
VACCDSCAFF1	3639869	99	99	64	1	34
VACCDSCAFF1	3639902	99	99	60	14	25
VACCDSCAFF1	3646131	99	97	41	54	2
VACCDSCAFF1	3646158	99	97	21	59	17
VACCDSCAFF1	3646179	99	97	15	82	0
VACCDSCAFF1	3646180	99	97	21	59	17
VACCDSCAFF1	3646181	99	97	35	22	40
VACCDSCAFF1	3646191	99	97	31	64	2
VACCDSCAFF1	3646206	99	97	35	22	40
VACCDSCAFF1	3646213	99	97	34	24	39
VACCDSCAFF1	3646250	99	97	55	0	42
VACCDSCAFF1	3646268	99	97	38	58	1
VACCDSCAFF1	3647682	99	98	61	37	0
VACCDSCAFF1	3647697	99	98	17	81	0
VACCDSCAFF1	3647725	99	98	37	61	0
VACCDSCAFF1	3647737	99	98	17	81	0
VACCDSCAFF1	3647741	99	98	41	57	0
VACCDSCAFF1	3647742	99	98	39	59	0
VACCDSCAFF1	3647748	99	98	41	57	0
VACCDSCAFF1	3654027	99	95	31	61	3
VACCDSCAFF1	3654045	99	95	22	71	2
VACCDSCAFF1	3654270	99	96	29	67	0
VACCDSCAFF1	3654324	99	98	54	41	3
VACCDSCAFF1	3654333	99	98	54	40	4
VACCDSCAFF1	3667535	99	96	55	14	27
VACCDSCAFF1	3667544	99	96	45	46	5
VACCDSCAFF1	3667605	99	92	37	16	39
VACCDSCAFF1	3667709	99	95	47	44	4
VACCDSCAFF1	3667710	99	94	20	74	0
VACCDSCAFF1	3667856	99	95	56	11	28
VACCDSCAFF1	3667886	99	99	41	58	0
VACCDSCAFF1	3667918	99	99	64	9	26
VACCDSCAFF1	3667948	99	99	64	33	2
VACCDSCAFF1	3667975	99	98	46	52	0
VACCDSCAFF1	3668049	99	98	70	2	26
VACCDSCAFF1	3668061	99	98	41	57	0
VACCDSCAFF1	3668088	99	99	23	75	1
VACCDSCAFF1	3672709	99	97	41	56	0
VACCDSCAFF1	3674878	99	97	27	69	1
VACCDSCAFF1	3674884	99	98	49	46	3
VACCDSCAFF1	3711254	99	91	30	57	4
VACCDSCAFF1	3711256	99	93	35	49	9
VACCDSCAFF1	3711323	99	96	48	21	27
VACCDSCAFF1	3739518	99	99	32	66	1
VACCDSCAFF1	3741540	99	95	55	20	20
VACCDSCAFF1	3742804	99	97	54	20	23
VACCDSCAFF1	3742962	99	94	19	38	37
VACCDSCAFF1	3742997	99	96	71	3	22
VACCDSCAFF1	3743104	99	96	24	70	2
VACCDSCAFF1	3750362	99	94	57	23	14
VACCDSCAFF1	3757556	99	97	13	78	6
VACCDSCAFF1	3777118	99	92	31	46	15
VACCDSCAFF1	3777119	99	93	30	48	15
VACCDSCAFF1	3778504	99	97	24	73	0
VACCDSCAFF1	3778654	99	97	39	58	0
VACCDSCAFF1	3778666	99	97	21	76	0
VACCDSCAFF1	3816478	99	97	40	55	2
VACCDSCAFF1	3825366	99	98	47	50	1
VACCDSCAFF1	3825370	99	98	22	76	0
VACCDSCAFF1	3825413	99	97	35	5	57
VACCDSCAFF1	3825523	99	92	19	73	0
VACCDSCAFF1	3825751	99	94	45	49	0
VACCDSCAFF1	3842979	99	98	41	57	0
VACCDSCAFF1	3842983	99	98	35	63	0
VACCDSCAFF1	3842985	99	98	81	2	15
VACCDSCAFF1	3842995	99	98	96	2	0
VACCDSCAFF1	3842996	99	98	73	25	0
VACCDSCAFF1	3843001	99	98	83	2	13
VACCDSCAFF1	3843006	99	98	41	57	0
VACCDSCAFF1	3843020	99	98	87	1	10
VACCDSCAFF1	3843034	99	98	86	2	10
VACCDSCAFF1	3843115	99	98	47	51	0
VACCDSCAFF1	3843156	99	97	31	66	0
VACCDSCAFF1	3843184	99	98	33	0	65
VACCDSCAFF1	3843190	99	98	15	83	0
VACCDSCAFF1	3858097	99	97	18	0	79
VACCDSCAFF1	3858118	99	97	49	7	41
VACCDSCAFF1	3858226	99	97	45	52	0
VACCDSCAFF1	3863150	99	97	42	55	0
VACCDSCAFF1	3863156	99	98	50	8	40
VACCDSCAFF1	3863160	99	98	50	8	40
VACCDSCAFF1	3863166	99	98	20	78	0
VACCDSCAFF1	3863193	99	98	43	39	16
VACCDSCAFF1	3863195	99	97	44	16	37
VACCDSCAFF1	3863282	99	98	46	51	1
VACCDSCAFF1	3863289	99	98	46	51	1
VACCDSCAFF1	3908080	99	96	19	1	76
VACCDSCAFF1	3908086	99	96	40	42	14
VACCDSCAFF1	3914322	99	98	13	17	68
VACCDSCAFF1	3914503	99	98	15	15	68
VACCDSCAFF1	3914543	99	97	18	12	67
VACCDSCAFF1	3922503	99	94	24	68	2
VACCDSCAFF1	3922529	99	94	34	26	34
VACCDSCAFF1	3936671	99	96	16	80	0
VACCDSCAFF1	3936672	99	96	15	81	0
VACCDSCAFF1	3936678	99	96	22	74	0
VACCDSCAFF1	3936697	99	96	23	0	73
VACCDSCAFF1	3936708	99	96	57	35	4
VACCDSCAFF1	3936766	99	96	21	75	0
VACCDSCAFF1	3936768	99	96	20	76	0
VACCDSCAFF1	3936811	99	96	19	77	0
VACCDSCAFF1	3936821	99	97	14	83	0
VACCDSCAFF1	3936860	99	97	23	74	0
VACCDSCAFF1	3936882	99	97	18	79	0
VACCDSCAFF1	3937085	99	97	19	78	0
VACCDSCAFF1	3944753	99	97	17	0	80
VACCDSCAFF1	3944755	99	97	17	0	80
VACCDSCAFF1	3944759	99	97	17	0	80
VACCDSCAFF1	3944816	99	97	34	25	38
VACCDSCAFF1	3944828	99	97	12	71	14
VACCDSCAFF1	3993844	99	94	23	1	70
VACCDSCAFF1	3993872	99	96	18	78	0
VACCDSCAFF1	3993908	99	96	29	67	0
VACCDSCAFF1	4022872	99	93	18	30	45
VACCDSCAFF1	4022918	99	97	20	77	0
VACCDSCAFF1	4022927	99	97	25	68	4
VACCDSCAFF1	4022941	99	97	37	34	26
VACCDSCAFF1	4063548	99	97	40	16	41
VACCDSCAFF1	4157819	99	97	17	75	5
VACCDSCAFF1	4157822	99	97	44	51	2
VACCDSCAFF1	4157846	99	97	38	59	0
VACCDSCAFF1	4157888	99	94	47	36	11
VACCDSCAFF1	4157890	99	94	47	36	11
VACCDSCAFF1	4157894	99	94	40	54	0
VACCDSCAFF1	4157914	99	94	10	84	0
VACCDSCAFF1	4157937	99	92	23	68	1
VACCDSCAFF1	4157967	99	94	40	54	0
VACCDSCAFF1	4157992	99	94	54	40	0
VACCDSCAFF1	4157993	99	94	48	37	9
VACCDSCAFF1	4157999	99	94	21	73	0
VACCDSCAFF1	4158023	99	93	29	64	0
VACCDSCAFF1	4190904	99	92	10	82	0
VACCDSCAFF1	4190908	99	92	10	82	0
VACCDSCAFF1	4203375	99	96	30	65	1
VACCDSCAFF1	4203394	99	96	41	55	0
VACCDSCAFF1	4203397	99	96	13	83	0
VACCDSCAFF1	4203400	99	96	58	37	1
VACCDSCAFF1	4203402	99	96	13	83	0
VACCDSCAFF1	4203412	99	96	27	69	0
VACCDSCAFF1	4203422	99	96	12	84	0
VACCDSCAFF1	4203465	99	94	49	42	3
VACCDSCAFF1	4203466	99	95	9	85	1
VACCDSCAFF1	4203473	99	96	24	72	0
VACCDSCAFF1	4203477	99	96	8	87	1
VACCDSCAFF1	4203481	99	96	27	69	0
VACCDSCAFF1	4203484	99	96	46	49	1
VACCDSCAFF1	4203489	99	96	18	78	0
VACCDSCAFF1	4203491	99	96	22	73	1
VACCDSCAFF1	4203494	99	95	12	82	1
VACCDSCAFF1	4203500	99	96	14	82	0
VACCDSCAFF1	4203504	99	94	17	77	0
VACCDSCAFF1	4203512	99	93	17	75	1
VACCDSCAFF1	4203514	99	95	24	71	0
VACCDSCAFF1	4203519	99	95	10	85	0
VACCDSCAFF1	4203522	99	94	22	71	1
VACCDSCAFF1	4281850	99	91	30	5	56
VACCDSCAFF1	4281919	99	91	30	5	56
VACCDSCAFF1	4281920	99	91	27	61	3
VACCDSCAFF1	4281946	99	91	29	5	57
VACCDSCAFF1	4288158	99	97	41	56	0
VACCDSCAFF1	4288185	99	98	34	62	2
VACCDSCAFF1	4288189	99	98	34	62	2
VACCDSCAFF1	4288215	99	98	50	23	25
VACCDSCAFF1	4297220	99	96	23	72	1
VACCDSCAFF1	4307701	99	97	44	9	44
VACCDSCAFF1	4307702	99	97	23	2	72
VACCDSCAFF1	4307749	99	97	32	65	0
VACCDSCAFF1	4307848	99	97	22	3	72
VACCDSCAFF1	4307864	99	97	63	31	3
VACCDSCAFF1	4307956	99	98	22	1	75
VACCDSCAFF1	4307968	99	98	36	62	0
VACCDSCAFF1	4307970	99	99	15	83	1
VACCDSCAFF1	4307989	99	99	15	83	1
VACCDSCAFF1	4308004	99	99	27	72	0
VACCDSCAFF1	4308022	99	99	28	2	69
VACCDSCAFF1	4325894	99	98	14	0	84
VACCDSCAFF1	4328484	99	97	29	68	0
VACCDSCAFF1	4328527	99	98	28	0	70
VACCDSCAFF1	4328861	99	95	64	1	30
VACCDSCAFF1	4328866	99	95	23	72	0
VACCDSCAFF1	4328881	99	95	63	1	31
VACCDSCAFF1	4328882	99	95	42	27	26
VACCDSCAFF1	4328896	99	95	23	72	0
VACCDSCAFF1	4328899	99	95	36	43	16
VACCDSCAFF1	4328907	99	95	19	76	0
VACCDSCAFF1	4328947	99	95	36	43	16
VACCDSCAFF1	4357435	99	99	23	76	0
VACCDSCAFF1	4357445	99	99	47	52	0
VACCDSCAFF1	4357467	99	99	13	86	0
VACCDSCAFF1	4357478	99	99	11	1	87
VACCDSCAFF1	4357484	99	99	52	46	1
VACCDSCAFF1	4357486	99	99	10	1	88
VACCDSCAFF1	4384877	99	97	26	55	16
VACCDSCAFF1	4386755	99	98	36	43	19
VACCDSCAFF1	4388405	99	93	44	24	25
VACCDSCAFF1	4388505	99	93	31	60	2
VACCDSCAFF1	4428526	99	96	19	77	0
VACCDSCAFF1	4428823	99	96	25	71	0
VACCDSCAFF1	4428825	99	96	36	60	0
VACCDSCAFF1	4428882	99	98	14	68	16
VACCDSCAFF1	4433813	99	98	17	81	0
VACCDSCAFF1	4433822	99	98	41	17	40
VACCDSCAFF1	4433832	99	98	40	58	0
VACCDSCAFF1	4433849	99	98	41	17	40
VACCDSCAFF1	4434110	99	90	35	17	38
VACCDSCAFF1	4434111	99	90	31	59	0
VACCDSCAFF1	4434162	99	94	16	76	2
VACCDSCAFF1	4434415	99	95	30	17	48
VACCDSCAFF1	4454861	99	94	49	37	8
VACCDSCAFF1	4454863	99	94	21	72	1
VACCDSCAFF1	4455006	99	93	24	68	1
VACCDSCAFF1	4455020	99	94	25	69	0
VACCDSCAFF1	4465107	99	94	21	67	6
VACCDSCAFF1	4465134	99	94	22	67	5
VACCDSCAFF1	4465135	99	94	35	57	2
VACCDSCAFF1	4465155	99	93	38	53	2
VACCDSCAFF1	4465196	99	93	30	50	13
VACCDSCAFF1	4465251	99	96	41	55	0
VACCDSCAFF1	4465252	99	96	49	47	0
VACCDSCAFF1	4465274	99	95	48	33	14
VACCDSCAFF1	4485195	99	98	63	35	0
VACCDSCAFF1	4485253	99	98	90	1	7
VACCDSCAFF1	4485263	99	98	23	75	0
VACCDSCAFF1	4492097	99	98	33	24	41
VACCDSCAFF1	4492186	99	98	25	73	0
VACCDSCAFF1	4492212	99	98	71	3	24
VACCDSCAFF1	4492267	99	96	27	68	1
VACCDSCAFF1	4492381	99	96	61	34	1
VACCDSCAFF1	4494533	99	98	48	1	49
VACCDSCAFF1	4494593	99	98	42	55	1
VACCDSCAFF1	4494680	99	97	32	64	1
VACCDSCAFF1	4530693	99	97	29	67	1
VACCDSCAFF1	4530781	99	96	32	63	1
VACCDSCAFF1	4530799	99	97	40	57	0
VACCDSCAFF1	4530825	99	97	44	17	36
VACCDSCAFF1	4530936	99	97	48	49	0
VACCDSCAFF1	4530989	99	95	29	64	2
VACCDSCAFF1	4531010	99	98	46	52	0
VACCDSCAFF1	4531016	99	97	28	68	1
VACCDSCAFF1	4531041	99	98	47	17	34
VACCDSCAFF1	4536918	99	94	34	45	15
VACCDSCAFF1	4536938	99	94	42	22	30
VACCDSCAFF1	4537092	99	94	53	19	22
VACCDSCAFF1	4537660	99	98	39	42	17
VACCDSCAFF1	4537690	99	98	57	22	19
VACCDSCAFF1	4540389	99	97	54	31	12
VACCDSCAFF1	4540391	99	97	41	55	1
VACCDSCAFF1	4540402	99	97	44	53	0
VACCDSCAFF1	4540409	99	97	31	0	66
VACCDSCAFF1	4540410	99	97	30	0	67
VACCDSCAFF1	4540429	99	97	42	55	0
VACCDSCAFF1	4540450	99	97	77	14	6
VACCDSCAFF1	4540457	99	97	36	61	0
VACCDSCAFF1	4540482	99	97	58	28	11
VACCDSCAFF1	4569664	99	99	37	46	16
VACCDSCAFF1	4569670	99	99	13	86	0
VACCDSCAFF1	4569680	99	99	41	42	16
VACCDSCAFF1	4569694	99	99	23	75	1
VACCDSCAFF1	4569702	99	99	25	72	2
VACCDSCAFF1	4569745	99	99	47	52	0
VACCDSCAFF1	4569778	99	99	23	74	2
VACCDSCAFF1	4632527	99	98	41	56	1
VACCDSCAFF1	4632530	99	98	41	56	1
VACCDSCAFF1	4643305	99	97	24	72	1
VACCDSCAFF1	4643309	99	97	24	72	1
VACCDSCAFF1	4661575	99	97	20	66	11
VACCDSCAFF1	4661597	99	97	56	23	18
VACCDSCAFF1	4661619	99	97	53	4	40
VACCDSCAFF1	4661671	99	94	25	52	17
VACCDSCAFF1	4661678	99	95	27	65	3
VACCDSCAFF1	4662555	99	99	59	10	30
VACCDSCAFF1	4662571	99	99	41	57	1
VACCDSCAFF1	4662573	99	98	40	56	2
VACCDSCAFF1	4662585	99	99	41	57	1
VACCDSCAFF1	4663091	99	97	50	47	0
VACCDSCAFF1	4688610	99	98	43	55	0
VACCDSCAFF1	4688625	99	98	39	59	0
VACCDSCAFF1	4692416	99	97	26	71	0
VACCDSCAFF1	4692427	99	97	59	31	7
VACCDSCAFF1	4692428	99	97	26	70	1
VACCDSCAFF1	4692598	99	97	26	66	5
VACCDSCAFF1	4692600	99	97	41	55	1
VACCDSCAFF1	4692602	99	97	45	5	47
VACCDSCAFF1	4692635	99	97	77	5	15
VACCDSCAFF1	4692646	99	97	38	57	2
VACCDSCAFF1	4709848	99	91	37	52	2
VACCDSCAFF1	4712148	99	95	23	50	22
VACCDSCAFF1	4712801	99	98	37	60	1
VACCDSCAFF1	4712813	99	98	45	6	47
VACCDSCAFF1	4712840	99	98	47	49	2
VACCDSCAFF1	4712846	99	98	51	45	2
VACCDSCAFF1	4714757	99	97	17	71	9
VACCDSCAFF1	4714768	99	96	13	65	18
VACCDSCAFF1	4714814	99	97	11	68	18
VACCDSCAFF1	4714849	99	96	32	42	22
VACCDSCAFF1	4727094	99	94	18	76	0
VACCDSCAFF1	4727102	99	95	43	51	1
VACCDSCAFF1	4727143	99	95	34	60	1
VACCDSCAFF1	4741056	99	98	41	57	0
VACCDSCAFF1	4744230	99	98	38	60	0
VACCDSCAFF1	4750127	99	98	60	22	16
VACCDSCAFF1	4817586	99	97	15	60	22
VACCDSCAFF1	4817601	99	97	34	18	45
VACCDSCAFF1	4818296	99	97	36	60	1
VACCDSCAFF1	4818355	99	97	16	0	81
VACCDSCAFF1	4825803	99	99	51	5	43
VACCDSCAFF1	4839097	99	97	37	0	60
VACCDSCAFF1	4839098	99	97	44	51	2
VACCDSCAFF1	4839105	99	97	33	0	64
VACCDSCAFF1	4839126	99	97	75	1	21
VACCDSCAFF1	4839395	99	99	98	1	0
VACCDSCAFF1	4839407	99	99	53	46	0
VACCDSCAFF1	4839411	99	99	42	57	0
VACCDSCAFF1	4839414	99	99	53	46	0
VACCDSCAFF1	4839432	99	99	49	50	0
VACCDSCAFF1	4839436	99	99	53	46	0
VACCDSCAFF1	4902784	99	97	41	8	48
VACCDSCAFF1	4902786	99	97	42	6	49
VACCDSCAFF1	4902809	99	96	42	6	48
VACCDSCAFF1	4902828	99	96	40	6	50
VACCDSCAFF1	4902836	99	97	39	56	2
VACCDSCAFF1	4908957	99	95	23	71	1
VACCDSCAFF1	4909144	99	96	11	82	3
VACCDSCAFF1	4909179	99	95	10	84	1
VACCDSCAFF1	4948613	99	96	51	27	18
VACCDSCAFF1	4948634	99	96	48	32	16
VACCDSCAFF1	4948697	99	96	57	16	23
VACCDSCAFF1	4948723	99	96	52	27	17
VACCDSCAFF1	4948830	99	98	50	31	17
VACCDSCAFF1	4948867	99	98	43	1	54
VACCDSCAFF1	4955740	99	98	46	37	15
VACCDSCAFF1	4955743	99	98	51	31	16
VACCDSCAFF1	4955794	99	98	43	53	2
VACCDSCAFF1	4955809	99	98	36	61	1
VACCDSCAFF1	4955827	99	98	66	29	3
VACCDSCAFF1	4955898	99	96	65	26	5
VACCDSCAFF1	4955899	99	96	27	66	3
VACCDSCAFF1	4955937	99	95	16	79	0
VACCDSCAFF1	4956015	99	96	62	14	20
VACCDSCAFF1	4956016	99	96	52	41	3
VACCDSCAFF1	4956025	99	96	16	80	0
VACCDSCAFF1	4956203	99	97	47	34	16
VACCDSCAFF1	4956239	99	97	31	65	1
VACCDSCAFF1	4956246	99	97	47	34	16
VACCDSCAFF1	4974832	99	97	29	66	2
VACCDSCAFF1	4974851	99	97	32	24	41
VACCDSCAFF1	4978869	99	95	35	43	17
VACCDSCAFF1	4978915	99	97	16	80	1
VACCDSCAFF1	4979066	99	97	29	67	1
VACCDSCAFF1	4979134	99	97	29	67	1
VACCDSCAFF1	4979238	99	95	24	2	69
VACCDSCAFF1	4979239	99	95	35	24	36
VACCDSCAFF1	4979258	99	96	20	0	76
VACCDSCAFF1	4979273	99	96	24	33	39
VACCDSCAFF1	4979337	99	96	34	22	40
VACCDSCAFF1	4979368	99	96	30	65	1
VACCDSCAFF1	5004746	99	99	77	22	0
VACCDSCAFF1	5004753	99	99	79	0	20
VACCDSCAFF1	5004757	99	99	47	52	0
VACCDSCAFF1	5004759	99	99	82	17	0
VACCDSCAFF1	5004761	99	98	32	0	66
VACCDSCAFF1	5004777	99	99	66	33	0
VACCDSCAFF1	5004778	99	99	67	32	0
VACCDSCAFF1	5004787	99	99	58	41	0
VACCDSCAFF1	5004788	99	99	32	67	0
VACCDSCAFF1	5004806	99	99	70	29	0
VACCDSCAFF1	5004810	99	99	81	18	0
VACCDSCAFF1	5004839	99	98	29	5	64
VACCDSCAFF1	5008254	99	98	49	35	14
VACCDSCAFF1	5008271	99	98	8	89	1
VACCDSCAFF1	5008272	99	98	41	53	4
VACCDSCAFF1	5008274	99	98	15	83	0
VACCDSCAFF1	5008278	99	98	21	1	76
VACCDSCAFF1	5008303	99	98	34	47	17
VACCDSCAFF1	5031074	99	90	38	50	2
VACCDSCAFF1	5031094	99	90	9	81	0
VACCDSCAFF1	5091842	99	96	41	55	0
VACCDSCAFF1	5092043	99	96	50	31	15
VACCDSCAFF1	5092137	99	99	48	51	0
VACCDSCAFF1	5099239	99	91	31	59	1
VACCDSCAFF1	5103684	99	98	33	65	0
VACCDSCAFF1	5108062	99	92	28	63	1
VACCDSCAFF1	5127025	99	94	32	53	9
VACCDSCAFF1	5127081	99	93	12	78	3
VACCDSCAFF1	5127105	99	94	32	52	10
VACCDSCAFF1	5127111	99	94	28	55	11
VACCDSCAFF1	5127156	99	96	31	65	0
VACCDSCAFF1	5127160	99	96	31	65	0
VACCDSCAFF1	5127172	99	96	29	46	21
VACCDSCAFF1	5127187	99	96	31	65	0
VACCDSCAFF1	5127211	99	97	27	48	22
VACCDSCAFF1	5127255	99	98	24	73	1
VACCDSCAFF1	5127283	99	98	23	75	0
VACCDSCAFF1	5127348	99	98	47	51	0
VACCDSCAFF1	5127353	99	98	49	24	25
VACCDSCAFF1	5127372	99	97	43	54	0
VACCDSCAFF1	5135165	99	97	30	65	2
VACCDSCAFF1	5135252	99	98	23	74	1
VACCDSCAFF1	5135279	99	98	33	65	0
VACCDSCAFF1	5135314	99	91	29	8	54
VACCDSCAFF1	5135358	99	98	62	33	3
VACCDSCAFF1	5135364	99	98	62	33	3
VACCDSCAFF1	5135376	99	98	37	61	0
VACCDSCAFF1	5135388	99	98	88	7	3
VACCDSCAFF1	5135391	99	97	19	78	0
VACCDSCAFF1	5138770	99	98	33	64	1
VACCDSCAFF1	5138781	99	98	15	83	0
VACCDSCAFF1	5138791	99	98	43	38	17
VACCDSCAFF1	5138853	99	97	47	48	2
VACCDSCAFF1	5148506	99	94	48	46	0
VACCDSCAFF1	5148513	99	94	52	42	0
VACCDSCAFF1	5148514	99	94	36	58	0
VACCDSCAFF1	5148537	99	95	29	66	0
VACCDSCAFF1	5148541	99	95	13	1	81
VACCDSCAFF1	5148546	99	94	23	71	0
VACCDSCAFF1	5148566	99	94	49	42	3
VACCDSCAFF1	5148708	99	94	53	3	38
VACCDSCAFF1	5148720	99	94	34	59	1
VACCDSCAFF1	5148736	99	93	29	52	12
VACCDSCAFF1	5148744	99	93	34	58	1
VACCDSCAFF1	5150104	99	98	13	20	65
VACCDSCAFF1	5150114	99	98	20	13	65
VACCDSCAFF1	5150117	99	98	11	0	87
VACCDSCAFF1	5150153	99	98	23	9	66
VACCDSCAFF1	5150213	99	98	50	21	27
VACCDSCAFF1	5150224	99	98	14	19	65
VACCDSCAFF1	5150238	99	97	14	20	63
VACCDSCAFF1	5150259	99	98	14	19	65
VACCDSCAFF1	5150300	99	98	19	12	67
VACCDSCAFF1	5150317	99	97	21	74	2
VACCDSCAFF1	5150324	99	98	30	67	1
VACCDSCAFF1	5150348	99	98	20	78	0
VACCDSCAFF1	5150354	99	98	33	64	1
VACCDSCAFF1	5150439	99	97	30	50	17
VACCDSCAFF1	5150441	99	97	15	74	8
VACCDSCAFF1	5150453	99	97	13	20	64
VACCDSCAFF1	5150454	99	97	35	53	9
VACCDSCAFF1	5150456	99	97	14	19	64
VACCDSCAFF1	5150474	99	97	25	68	4
VACCDSCAFF1	5150489	99	94	22	1	71
VACCDSCAFF1	5234148	99	91	25	63	3
VACCDSCAFF1	5234364	99	91	17	0	74
VACCDSCAFF1	5256815	99	98	76	0	22
VACCDSCAFF1	5256825	99	98	10	88	0
VACCDSCAFF1	5260337	99	98	28	69	1
VACCDSCAFF1	5260343	99	98	14	0	84
VACCDSCAFF1	5260350	99	98	40	25	33
VACCDSCAFF1	5260358	99	98	24	73	1
VACCDSCAFF1	5260362	99	98	11	74	13
VACCDSCAFF1	5260366	99	98	24	73	1
VACCDSCAFF1	5306014	99	92	24	68	0
VACCDSCAFF1	5326614	99	96	48	29	19
VACCDSCAFF1	5333532	99	93	26	66	1
VACCDSCAFF1	5333554	99	90	32	6	52
VACCDSCAFF1	5333683	99	93	16	73	4
VACCDSCAFF1	5333831	99	99	51	14	34
VACCDSCAFF1	5333863	99	99	11	88	0
VACCDSCAFF1	5333908	99	99	25	74	0
VACCDSCAFF1	5333942	99	97	32	47	18
VACCDSCAFF1	5333946	99	97	55	28	14
VACCDSCAFF1	5333986	99	96	27	5	64
VACCDSCAFF1	5345254	99	97	29	66	2
VACCDSCAFF1	5345284	99	97	28	67	2
VACCDSCAFF1	5345380	99	97	29	66	2
VACCDSCAFF1	5345405	99	97	49	47	1
VACCDSCAFF1	5390687	99	93	18	39	36
VACCDSCAFF1	5464649	99	97	47	38	12
VACCDSCAFF1	5464677	99	90	42	23	25
VACCDSCAFF1	5464757	99	95	23	71	1
VACCDSCAFF1	5464781	99	95	51	41	3
VACCDSCAFF1	5465379	99	98	54	44	0
VACCDSCAFF1	5465394	99	98	24	73	1
VACCDSCAFF1	5465402	99	98	26	72	0
VACCDSCAFF1	5465408	99	98	38	43	17
VACCDSCAFF1	5477229	99	98	31	67	0
VACCDSCAFF1	5478098	99	91	30	59	2
VACCDSCAFF1	5478230	99	92	29	41	22
VACCDSCAFF1	5478234	99	91	22	17	52
VACCDSCAFF1	5565298	99	91	24	63	4
VACCDSCAFF1	5565320	99	92	26	65	1
VACCDSCAFF1	5604992	99	98	20	11	67
VACCDSCAFF1	5764136	99	91	52	9	30
VACCDSCAFF1	5764192	99	92	52	16	24
VACCDSCAFF1	5766405	99	96	51	44	1
VACCDSCAFF1	5766462	99	98	17	81	0
VACCDSCAFF1	5766465	99	98	15	83	0
VACCDSCAFF1	5768782	99	91	13	78	0
VACCDSCAFF1	5768793	99	91	14	77	0
VACCDSCAFF1	5768794	99	91	10	81	0
VACCDSCAFF1	5768870	99	94	14	80	0
VACCDSCAFF1	5768875	99	94	72	21	1
VACCDSCAFF1	5768878	99	94	45	49	0
VACCDSCAFF1	5768972	99	94	37	57	0
VACCDSCAFF1	5768977	99	94	44	50	0
VACCDSCAFF1	5768986	99	94	38	56	0
VACCDSCAFF1	6181656	99	93	30	63	0
VACCDSCAFF1	6181662	99	93	13	75	5
VACCDSCAFF1	6181667	99	93	26	67	0
VACCDSCAFF1	6181668	99	92	29	63	0
VACCDSCAFF1	6181678	99	92	25	67	0
VACCDSCAFF1	6181680	99	92	13	0	79
VACCDSCAFF1	6249152	99	94	25	69	0
VACCDSCAFF1	6249171	99	94	24	66	4
VACCDSCAFF1	6263075	99	91	24	54	13
VACCDSCAFF1	6263348	99	95	36	51	8
VACCDSCAFF1	6263362	99	94	26	67	1
VACCDSCAFF1	6263486	99	95	37	41	17
VACCDSCAFF1	6263487	99	94	26	67	1
VACCDSCAFF1	6263488	99	95	46	13	36
VACCDSCAFF1	6265846	99	93	36	3	54
VACCDSCAFF1	6265847	99	93	43	8	42
VACCDSCAFF1	6265861	99	93	36	54	3
VACCDSCAFF1	6265868	99	93	9	83	1
VACCDSCAFF1	6307039	99	98	52	43	3
VACCDSCAFF1	6307044	99	98	45	51	2
VACCDSCAFF1	6307057	99	98	52	43	3
VACCDSCAFF1	6307062	99	98	52	43	3
VACCDSCAFF1	6307072	99	98	39	59	0
VACCDSCAFF1	6307074	99	98	52	43	3
VACCDSCAFF1	6312320	99	90	14	60	16
VACCDSCAFF1	6332469	99	98	62	21	15
VACCDSCAFF1	6338574	99	94	47	24	23
VACCDSCAFF1	6398990	99	97	45	50	2
VACCDSCAFF1	6399009	99	96	45	50	1
VACCDSCAFF1	6399024	99	98	24	73	1
VACCDSCAFF1	6399027	99	98	35	61	2
VACCDSCAFF1	6399036	99	98	39	58	1
VACCDSCAFF1	6399067	99	98	45	52	1
VACCDSCAFF1	6416167	99	99	53	43	3
VACCDSCAFF1	6416208	99	99	45	54	0
VACCDSCAFF1	6441514	99	97	18	79	0
VACCDSCAFF1	6441537	99	97	33	18	46
VACCDSCAFF1	6441551	99	95	30	18	47
VACCDSCAFF1	6441659	99	97	10	87	0
VACCDSCAFF1	6441676	99	97	37	39	21
VACCDSCAFF1	6441684	99	97	10	87	0
VACCDSCAFF1	6441731	99	92	39	43	10
VACCDSCAFF1	6441737	99	96	34	61	1
VACCDSCAFF1	6441747	99	97	11	86	0
VACCDSCAFF1	6441755	99	97	19	16	62
VACCDSCAFF1	6456363	99	98	15	83	0
VACCDSCAFF1	6456436	99	96	39	56	1
VACCDSCAFF1	6459488	99	97	59	35	3
VACCDSCAFF1	6459517	99	97	25	71	1
VACCDSCAFF1	6459523	99	97	60	34	3
VACCDSCAFF1	6459539	99	97	37	58	2
VACCDSCAFF1	6459587	99	97	59	35	3
VACCDSCAFF1	6459612	99	97	58	37	2
VACCDSCAFF1	6471599	99	93	15	68	10
VACCDSCAFF1	6471629	99	92	22	67	3
VACCDSCAFF1	6517316	99	98	59	17	22
VACCDSCAFF1	6517356	99	97	52	23	22
VACCDSCAFF1	6517419	99	98	41	18	39
VACCDSCAFF1	6517424	99	98	51	46	1
VACCDSCAFF1	6517425	99	98	25	73	0
VACCDSCAFF1	6517434	99	98	20	78	0
VACCDSCAFF1	6517458	99	98	30	68	0
VACCDSCAFF1	6517464	99	92	30	60	2
VACCDSCAFF1	6517485	99	90	42	42	6
VACCDSCAFF1	6517500	99	91	26	30	35
VACCDSCAFF1	6517648	99	90	38	44	8
VACCDSCAFF1	6517667	99	90	24	32	34
VACCDSCAFF1	6635831	99	93	25	67	1
VACCDSCAFF1	6635832	99	93	35	57	1
VACCDSCAFF1	6635837	99	93	36	56	1
VACCDSCAFF1	6635852	99	93	38	54	1
VACCDSCAFF1	6635865	99	93	43	1	49
VACCDSCAFF1	6635875	99	93	43	1	49
VACCDSCAFF1	6635900	99	93	64	20	9
VACCDSCAFF1	6635910	99	92	40	50	2
VACCDSCAFF1	6645323	99	93	25	14	54
VACCDSCAFF1	6719916	99	98	10	88	0
VACCDSCAFF1	6719952	99	98	19	69	10
VACCDSCAFF1	6719962	99	98	17	79	2
VACCDSCAFF1	6738514	99	95	38	57	0
VACCDSCAFF1	6738516	99	96	42	53	1
VACCDSCAFF1	6738519	99	97	10	87	0
VACCDSCAFF1	6738536	99	96	38	58	0
VACCDSCAFF1	6738542	99	96	65	14	17
VACCDSCAFF1	6738544	99	96	20	73	3
VACCDSCAFF1	6738545	99	96	63	0	33
VACCDSCAFF1	6738548	99	97	60	34	3
VACCDSCAFF1	6738549	99	96	28	68	0
VACCDSCAFF1	6738562	99	97	27	70	0
VACCDSCAFF1	6738579	99	94	37	57	0
VACCDSCAFF1	6738609	99	95	17	75	3
VACCDSCAFF1	6738610	99	95	66	24	5
VACCDSCAFF1	6776155	99	94	6	6	82
VACCDSCAFF1	6839122	99	98	57	26	15
VACCDSCAFF1	6839191	99	98	60	27	11
VACCDSCAFF1	6839209	99	98	62	1	35
VACCDSCAFF1	6901128	99	98	34	47	17
VACCDSCAFF1	6907398	99	90	35	43	12
VACCDSCAFF1	6907399	99	90	43	43	4
VACCDSCAFF1	6907428	99	92	26	66	0
VACCDSCAFF1	6907434	99	91	43	32	16
VACCDSCAFF1	6907442	99	92	23	68	1
VACCDSCAFF1	6921406	99	94	26	9	59
VACCDSCAFF1	6921407	99	95	25	9	61
VACCDSCAFF1	7036001	99	99	24	1	74
VACCDSCAFF1	7036004	99	99	23	1	75
VACCDSCAFF1	7039547	99	97	56	1	40
VACCDSCAFF1	7039578	99	97	17	79	1
VACCDSCAFF1	7039584	99	97	15	82	0
VACCDSCAFF1	7039743	99	97	35	48	14
VACCDSCAFF1	7056165	99	97	39	58	0
VACCDSCAFF1	7059870	99	98	56	21	21
VACCDSCAFF1	7061216	99	96	59	19	18
VACCDSCAFF1	7065376	99	98	11	87	0
VACCDSCAFF1	7065377	99	98	46	49	3
VACCDSCAFF1	7065386	99	98	43	46	9
VACCDSCAFF1	7065414	99	98	36	45	17
VACCDSCAFF1	7065588	99	98	36	45	17
VACCDSCAFF1	7067347	99	97	31	63	3
VACCDSCAFF1	7096874	99	97	35	61	1
VACCDSCAFF1	7096883	99	97	50	44	3
VACCDSCAFF1	7136655	99	90	3	84	3
VACCDSCAFF1	7136660	99	90	3	84	3
VACCDSCAFF1	7136679	99	90	17	24	49
VACCDSCAFF1	7136691	99	90	7	1	82
VACCDSCAFF1	7136790	99	98	58	40	0
VACCDSCAFF1	7209592	99	96	37	58	1
VACCDSCAFF1	7209594	99	96	39	57	0
VACCDSCAFF1	7209635	99	96	39	57	0
VACCDSCAFF1	7209700	99	95	39	55	1
VACCDSCAFF1	7218570	99	95	33	60	2
VACCDSCAFF1	7218587	99	95	27	67	1
VACCDSCAFF1	7218707	99	96	19	75	2
VACCDSCAFF1	7218774	99	98	43	30	25
VACCDSCAFF1	7218888	99	98	60	36	2
VACCDSCAFF1	7252667	99	99	40	43	16
VACCDSCAFF1	7280773	99	97	24	73	0
VACCDSCAFF1	7289470	99	98	25	72	1
VACCDSCAFF1	7289527	99	98	33	51	14
VACCDSCAFF1	7289546	99	98	33	51	14
VACCDSCAFF1	7289678	99	98	29	69	0
VACCDSCAFF1	7297200	99	98	26	72	0
VACCDSCAFF1	7297209	99	98	64	34	0
VACCDSCAFF1	7297216	99	98	39	57	2
VACCDSCAFF1	7299791	99	95	51	23	21
VACCDSCAFF1	7299879	99	95	26	66	3
VACCDSCAFF1	7299880	99	95	28	65	2
VACCDSCAFF1	7311725	99	97	54	17	26
VACCDSCAFF1	7311743	99	97	49	1	47
VACCDSCAFF1	7311765	99	97	56	17	24
VACCDSCAFF1	7311798	99	97	25	71	1
VACCDSCAFF1	7311818	99	97	39	58	0
VACCDSCAFF1	7357125	99	97	41	56	0
VACCDSCAFF1	7358446	99	93	23	68	2
VACCDSCAFF1	7370350	99	98	28	70	0
VACCDSCAFF1	7370417	99	98	51	2	45
VACCDSCAFF1	7370434	99	98	61	18	19
VACCDSCAFF1	7370435	99	98	31	66	1
VACCDSCAFF1	7371632	99	97	50	44	3
VACCDSCAFF1	7371641	99	97	48	44	5
VACCDSCAFF1	7371658	99	94	37	53	4
VACCDSCAFF1	7371701	99	97	42	51	4
VACCDSCAFF1	7371718	99	97	39	57	1
VACCDSCAFF1	7386786	99	97	18	77	2
VACCDSCAFF1	7386791	99	97	60	35	2
VACCDSCAFF1	7386890	99	97	25	71	1
VACCDSCAFF1	7386900	99	97	60	35	2
VACCDSCAFF1	7386919	99	97	49	3	45
VACCDSCAFF1	7393073	99	94	73	15	6
VACCDSCAFF1	7393099	99	95	24	70	1
VACCDSCAFF1	7393106	99	95	53	10	32
VACCDSCAFF1	7393116	99	95	40	52	3
VACCDSCAFF1	7556554	99	97	48	0	49
VACCDSCAFF1	7556601	99	97	21	76	0
VACCDSCAFF1	7556669	99	97	32	65	0
VACCDSCAFF1	7556682	99	97	34	63	0
VACCDSCAFF1	7570948	99	95	19	69	7
VACCDSCAFF1	7570950	99	95	25	54	16
VACCDSCAFF1	7575980	99	98	28	69	1
VACCDSCAFF1	7592949	99	97	68	27	2
VACCDSCAFF1	7592979	99	97	50	5	42
VACCDSCAFF1	7599989	99	97	56	28	13
VACCDSCAFF1	7599996	99	97	61	21	15
VACCDSCAFF1	7602435	99	97	25	72	0
VACCDSCAFF1	7602450	99	97	55	20	22
VACCDSCAFF1	7602491	99	97	55	20	22
VACCDSCAFF1	7602503	99	97	38	57	2
VACCDSCAFF1	7603453	99	98	32	66	0
VACCDSCAFF1	7603457	99	98	33	65	0
VACCDSCAFF1	7603472	99	98	10	88	0
VACCDSCAFF1	7603488	99	98	80	18	0
VACCDSCAFF1	7603496	99	98	66	30	2
VACCDSCAFF1	7603533	99	95	20	1	74
VACCDSCAFF1	7603548	99	97	23	74	0
VACCDSCAFF1	7603569	99	97	35	62	0
VACCDSCAFF1	7603584	99	97	61	15	21
VACCDSCAFF1	7603588	99	97	27	70	0
VACCDSCAFF1	7603621	99	97	88	5	4
VACCDSCAFF1	7603638	99	97	91	0	6
VACCDSCAFF1	7603643	99	97	35	62	0
VACCDSCAFF1	7603646	99	97	32	65	0
VACCDSCAFF1	7603659	99	97	39	58	0
VACCDSCAFF1	7603667	99	97	93	0	4
VACCDSCAFF1	7605723	99	96	40	29	27
VACCDSCAFF1	7605727	99	95	42	28	25
VACCDSCAFF1	7605740	99	96	15	1	80
VACCDSCAFF1	7605748	99	95	46	36	13
VACCDSCAFF1	7605766	99	92	33	39	20
VACCDSCAFF1	7660651	99	90	37	52	1
VACCDSCAFF1	7660873	99	97	23	74	0
VACCDSCAFF1	7660886	99	97	30	67	0
VACCDSCAFF1	7660892	99	98	24	74	0
VACCDSCAFF1	7660893	99	98	18	80	0
VACCDSCAFF1	7660896	99	98	28	70	0
VACCDSCAFF1	7660897	99	98	23	75	0
VACCDSCAFF1	7660917	99	96	53	41	2
VACCDSCAFF1	7660922	99	96	60	25	11
VACCDSCAFF1	7660932	99	90	28	60	2
VACCDSCAFF1	7661121	99	92	17	75	0
VACCDSCAFF1	7661131	99	93	46	47	0
VACCDSCAFF1	7661140	99	94	11	83	0
VACCDSCAFF1	7661146	99	93	14	79	0
VACCDSCAFF1	7661149	99	93	25	68	0
VACCDSCAFF1	7663967	99	98	43	55	0
VACCDSCAFF1	7663980	99	98	54	18	26
VACCDSCAFF1	7664003	99	98	45	1	52
VACCDSCAFF1	7664005	99	98	51	21	26
VACCDSCAFF1	7664018	99	96	48	27	21
VACCDSCAFF1	7665477	99	97	43	54	0
VACCDSCAFF1	7665479	99	97	51	46	0
VACCDSCAFF1	7670616	99	98	25	73	0
VACCDSCAFF1	7670619	99	98	42	55	1
VACCDSCAFF1	7670628	99	97	74	6	17
VACCDSCAFF1	7670646	99	98	43	55	0
VACCDSCAFF1	7670811	99	98	32	66	0
VACCDSCAFF1	7671789	99	99	40	57	2
VACCDSCAFF1	7671796	99	99	39	58	2
VACCDSCAFF1	7671802	99	99	40	57	2
VACCDSCAFF1	7671818	99	96	32	63	1
VACCDSCAFF1	7676117	99	97	39	57	1
VACCDSCAFF1	7676120	99	97	23	73	1
VACCDSCAFF1	7754552	99	97	19	78	0
VACCDSCAFF1	7754625	99	97	58	12	27
VACCDSCAFF1	7754660	99	97	26	70	1
VACCDSCAFF1	7775136	99	94	15	77	2
VACCDSCAFF1	7800676	99	97	59	20	18
VACCDSCAFF1	7827028	99	95	19	2	74
VACCDSCAFF1	7827206	99	92	19	71	2
VACCDSCAFF1	7827236	99	93	10	83	0
VACCDSCAFF1	7828734	99	97	49	47	1
VACCDSCAFF1	7828758	99	97	11	86	0
VACCDSCAFF1	7828848	99	97	37	59	1
VACCDSCAFF1	7828891	99	97	49	47	1
VACCDSCAFF1	7829675	99	92	17	70	5
VACCDSCAFF1	7829783	99	98	25	73	0
VACCDSCAFF1	7829807	99	98	25	72	1
VACCDSCAFF1	7848434	99	96	34	43	19
VACCDSCAFF1	7848449	99	97	55	32	10
VACCDSCAFF1	7848497	99	97	55	31	11
VACCDSCAFF1	7848562	99	96	60	24	12
VACCDSCAFF1	7848563	99	96	59	24	13
VACCDSCAFF1	7848671	99	97	41	40	16
VACCDSCAFF1	7848713	99	97	40	45	12
VACCDSCAFF1	7872453	99	98	24	9	65
VACCDSCAFF1	7872535	99	98	31	63	4
VACCDSCAFF1	7903926	99	97	44	25	28
VACCDSCAFF1	7946335	99	98	26	72	0
VACCDSCAFF1	7946336	99	98	48	12	38
VACCDSCAFF1	7946386	99	98	56	30	12
VACCDSCAFF1	7951593	99	92	52	33	7
VACCDSCAFF1	7951613	99	94	54	40	0
VACCDSCAFF1	7978410	99	97	20	7	70
VACCDSCAFF1	7978457	99	97	37	60	0
VACCDSCAFF1	7978480	99	95	37	57	1
VACCDSCAFF1	7978484	99	95	60	10	25
VACCDSCAFF1	7978509	99	95	37	57	1
VACCDSCAFF1	7978514	99	95	37	57	1
VACCDSCAFF1	7978615	99	97	12	0	85
VACCDSCAFF1	7978656	99	97	50	28	19
VACCDSCAFF1	7981047	99	97	22	74	1
VACCDSCAFF1	7981212	99	97	51	46	0
VACCDSCAFF1	7993714	99	99	43	56	0
VACCDSCAFF1	7993730	99	99	17	81	1
VACCDSCAFF1	7993751	99	99	88	9	2
VACCDSCAFF1	7993763	99	97	41	56	0
VACCDSCAFF1	7993807	99	98	24	2	72
VACCDSCAFF1	7993814	99	99	62	26	11
VACCDSCAFF1	7993825	99	98	24	74	0
VACCDSCAFF1	8010905	99	97	39	17	41
VACCDSCAFF1	8010941	99	95	23	54	18
VACCDSCAFF1	8011031	99	96	14	82	0
VACCDSCAFF1	8034022	99	98	42	56	0
VACCDSCAFF1	8034055	99	98	76	19	3
VACCDSCAFF1	8037628	99	95	45	40	10
VACCDSCAFF1	8037643	99	95	52	7	36
VACCDSCAFF1	8037698	99	95	27	68	0
VACCDSCAFF1	8037706	99	95	50	40	5
VACCDSCAFF1	8054481	99	98	47	46	5
VACCDSCAFF1	8054501	99	98	33	64	1
VACCDSCAFF1	8054504	99	98	34	63	1
VACCDSCAFF1	8054525	99	98	13	0	85
VACCDSCAFF1	8054544	99	95	25	69	1
VACCDSCAFF1	8054624	99	98	60	17	21
VACCDSCAFF1	8054626	99	98	38	58	2
VACCDSCAFF1	8054649	99	98	30	66	2
VACCDSCAFF1	8054650	99	98	27	71	0
VACCDSCAFF1	8056172	99	98	16	81	1
VACCDSCAFF1	8056180	99	98	31	66	1
VACCDSCAFF1	8056217	99	98	37	61	0
VACCDSCAFF1	8056315	99	98	33	65	0
VACCDSCAFF1	8056325	99	98	33	65	0
VACCDSCAFF1	8064188	99	97	26	70	1
VACCDSCAFF1	8064274	99	94	32	53	9
VACCDSCAFF1	8064304	99	94	30	63	1
VACCDSCAFF1	8064305	99	94	26	67	1
VACCDSCAFF1	8064311	99	94	25	69	0
VACCDSCAFF1	8064314	99	94	20	74	0
VACCDSCAFF1	8064317	99	94	19	75	0
VACCDSCAFF1	8064319	99	93	16	77	0
VACCDSCAFF1	8140433	99	99	28	3	68
VACCDSCAFF1	8140475	99	99	22	8	69
VACCDSCAFF1	8140518	99	99	38	43	18
VACCDSCAFF1	8142313	99	97	51	12	34
VACCDSCAFF1	8142328	99	97	46	20	31
VACCDSCAFF1	8142366	99	97	18	0	79
VACCDSCAFF1	8168104	99	97	61	23	13
VACCDSCAFF1	8170728	99	94	10	81	3
VACCDSCAFF1	8170738	99	94	12	5	77
VACCDSCAFF1	8192670	99	99	26	1	72
VACCDSCAFF1	8192718	99	99	62	23	14
VACCDSCAFF1	8216498	99	96	10	0	86
VACCDSCAFF1	8216541	99	97	40	56	1
VACCDSCAFF1	8216549	99	97	41	56	0
VACCDSCAFF1	8222559	99	99	59	10	30
VACCDSCAFF1	8222651	99	98	43	52	3
VACCDSCAFF1	8278881	99	97	51	14	32
VACCDSCAFF1	8278897	99	97	79	16	2
VACCDSCAFF1	8278928	99	97	27	70	0
VACCDSCAFF1	8278937	99	97	49	47	1
VACCDSCAFF1	8278947	99	97	30	67	0
VACCDSCAFF1	8279029	99	97	14	83	0
VACCDSCAFF1	8384626	99	99	36	62	1
VACCDSCAFF1	8384644	99	99	25	73	1
VACCDSCAFF1	8384698	99	96	42	50	4
VACCDSCAFF1	8384752	99	97	50	46	1
VACCDSCAFF1	8387980	99	92	16	76	0
VACCDSCAFF1	8388011	99	94	20	72	2
VACCDSCAFF1	8388028	99	92	40	52	0
VACCDSCAFF1	8388041	99	94	28	66	0
VACCDSCAFF1	8388053	99	94	41	51	2
VACCDSCAFF1	8388055	99	94	20	72	2
VACCDSCAFF1	8388065	99	94	39	52	3
VACCDSCAFF1	8388068	99	94	30	63	1
VACCDSCAFF1	8388071	99	94	23	69	2
VACCDSCAFF1	8388075	99	94	52	34	8
VACCDSCAFF1	8388088	99	93	28	64	1
VACCDSCAFF1	8417932	99	98	59	13	26
VACCDSCAFF1	8418006	99	97	31	48	18
VACCDSCAFF1	8418021	99	97	25	55	17
VACCDSCAFF1	8434842	99	92	38	52	2
VACCDSCAFF1	8434872	99	92	18	74	0
VACCDSCAFF1	8435055	99	92	25	66	1
VACCDSCAFF1	8435063	99	93	39	53	1
VACCDSCAFF1	8435087	99	91	21	70	0
VACCDSCAFF1	8445161	99	98	19	79	0
VACCDSCAFF1	8445163	99	98	65	21	12
VACCDSCAFF1	8445165	99	98	51	44	3
VACCDSCAFF1	8448735	99	97	56	1	40
VACCDSCAFF1	8448741	99	97	45	12	40
VACCDSCAFF1	8448765	99	97	15	70	12
VACCDSCAFF1	8490691	99	97	59	38	0
VACCDSCAFF1	8490738	99	97	37	60	0
VACCDSCAFF1	8490747	99	97	32	65	0
VACCDSCAFF1	8490767	99	97	67	30	0
VACCDSCAFF1	8490950	99	97	35	51	11
VACCDSCAFF1	8495403	99	94	22	72	0
VACCDSCAFF1	8495796	99	97	34	50	13
VACCDSCAFF1	8495817	99	97	55	13	29
VACCDSCAFF1	8497018	99	98	46	52	0
VACCDSCAFF1	8497053	99	98	45	53	0
VACCDSCAFF1	8515970	99	91	32	56	3
VACCDSCAFF1	8516018	99	92	32	57	3
VACCDSCAFF1	8516433	99	92	25	67	0
VACCDSCAFF1	8516466	99	91	28	62	1
VACCDSCAFF1	8517940	99	97	37	59	1
VACCDSCAFF1	8517990	99	97	44	53	0
VACCDSCAFF1	8525678	99	94	24	69	1
VACCDSCAFF1	8558804	99	98	22	0	76
VACCDSCAFF1	8558829	99	98	21	77	0
VACCDSCAFF1	8703000	99	91	22	69	0
VACCDSCAFF1	8703329	99	96	21	75	0
VACCDSCAFF1	8708414	99	98	44	40	14
VACCDSCAFF1	8708466	99	98	38	43	17
VACCDSCAFF1	8710652	99	97	64	19	14
VACCDSCAFF1	8710692	99	97	39	58	0
VACCDSCAFF1	8710709	99	97	39	41	17
VACCDSCAFF1	8719904	99	90	37	31	22
VACCDSCAFF1	8724678	99	96	36	59	1
VACCDSCAFF1	8724683	99	96	26	70	0
VACCDSCAFF1	8725129	99	98	60	0	38
VACCDSCAFF1	8725722	99	98	38	60	0
VACCDSCAFF1	8761632	99	95	26	67	2
VACCDSCAFF1	8761634	99	95	38	55	2
VACCDSCAFF1	8761709	99	95	29	66	0
VACCDSCAFF1	8761767	99	96	22	73	1
VACCDSCAFF1	8762545	99	97	55	24	18
VACCDSCAFF1	8762560	99	97	53	41	3
VACCDSCAFF1	8819641	99	90	46	25	19
VACCDSCAFF1	8819667	99	90	17	0	73
VACCDSCAFF1	8833436	99	98	34	57	7
VACCDSCAFF1	8833437	99	98	12	86	0
VACCDSCAFF1	8833453	99	98	64	32	2
VACCDSCAFF1	8833458	99	98	35	62	1
VACCDSCAFF1	8833467	99	98	63	34	1
VACCDSCAFF1	8833471	99	98	64	31	3
VACCDSCAFF1	8833478	99	98	63	34	1
VACCDSCAFF1	8833494	99	98	38	58	2
VACCDSCAFF1	8833505	99	98	62	32	4
VACCDSCAFF1	8833516	99	98	17	81	0
VACCDSCAFF1	8856253	99	96	39	56	1
VACCDSCAFF1	8856271	99	96	41	55	0
VACCDSCAFF1	8856276	99	95	32	63	0
VACCDSCAFF1	8856396	99	96	40	55	1
VACCDSCAFF1	8856399	99	95	13	82	0
VACCDSCAFF1	8856400	99	94	38	55	1
VACCDSCAFF1	8857331	99	98	58	17	23
VACCDSCAFF1	8857354	99	98	47	35	16
VACCDSCAFF1	8857358	99	98	58	20	20
VACCDSCAFF1	8857379	99	98	36	46	16
VACCDSCAFF1	8876523	99	93	32	60	1
VACCDSCAFF1	8876524	99	93	32	59	2
VACCDSCAFF1	8876531	99	94	28	66	0
VACCDSCAFF1	8876629	99	93	34	58	1
VACCDSCAFF1	8876632	99	93	51	24	18
VACCDSCAFF1	8876644	99	93	45	24	24
VACCDSCAFF1	8876656	99	94	47	23	24
VACCDSCAFF1	8877879	99	99	54	34	11
VACCDSCAFF1	8877889	99	99	57	41	1
VACCDSCAFF1	8877908	99	99	48	50	1
VACCDSCAFF1	8896814	99	98	66	32	0
VACCDSCAFF1	8896872	99	98	77	3	18
VACCDSCAFF1	8896873	99	98	41	55	2
VACCDSCAFF1	8896879	99	98	25	73	0
VACCDSCAFF1	8896937	99	98	66	32	0
VACCDSCAFF1	8896938	99	98	28	70	0
VACCDSCAFF1	8946116	99	90	11	40	39
VACCDSCAFF1	8946118	99	90	12	40	38
VACCDSCAFF1	8946126	99	90	16	2	72
VACCDSCAFF1	8946129	99	90	14	50	26
VACCDSCAFF1	8946135	99	90	13	50	27
VACCDSCAFF1	8946136	99	90	13	50	27
VACCDSCAFF1	8946147	99	90	12	40	38
VACCDSCAFF1	8946149	99	90	16	2	72
VACCDSCAFF1	8946150	99	90	12	40	38
VACCDSCAFF1	8946156	99	90	12	40	38
VACCDSCAFF1	8946311	99	97	41	21	35
VACCDSCAFF1	8946358	99	97	33	49	15
VACCDSCAFF1	8994165	99	97	35	53	9
VACCDSCAFF1	8994174	99	97	20	1	76
VACCDSCAFF1	8994175	99	96	48	1	47
VACCDSCAFF1	8994210	99	97	47	18	32
VACCDSCAFF1	8994217	99	97	48	17	32
VACCDSCAFF1	8994223	99	94	29	65	0
VACCDSCAFF1	8994224	99	95	37	51	7
VACCDSCAFF1	8994335	99	98	28	68	2
VACCDSCAFF1	9065847	99	96	46	48	2
VACCDSCAFF1	9065848	99	96	14	0	82
VACCDSCAFF1	9065885	99	96	25	70	1
VACCDSCAFF1	9065927	99	96	27	69	0
VACCDSCAFF1	9077347	99	97	36	60	1
VACCDSCAFF1	9077464	99	97	26	71	0
VACCDSCAFF1	9077535	99	97	29	68	0
VACCDSCAFF1	9126109	99	98	38	59	1
VACCDSCAFF1	9126110	99	98	72	23	3
VACCDSCAFF1	9127617	99	98	22	76	0
VACCDSCAFF1	9127656	99	99	45	54	0
VACCDSCAFF1	9127791	99	97	51	46	0
VACCDSCAFF1	9127799	99	97	47	50	0
VACCDSCAFF1	9128015	99	99	48	50	1
VACCDSCAFF1	9174688	99	93	45	2	46
VACCDSCAFF1	9174691	99	93	43	2	48
VACCDSCAFF1	9174693	99	93	43	2	48
VACCDSCAFF1	9192672	99	91	36	34	21
VACCDSCAFF1	9201209	99	95	31	63	1
VACCDSCAFF1	9201466	99	96	27	69	0
VACCDSCAFF1	9223508	99	94	19	0	75
VACCDSCAFF1	9223525	99	96	37	59	0
VACCDSCAFF1	9223608	99	96	18	0	78
VACCDSCAFF1	9223610	99	96	37	59	0
VACCDSCAFF1	9223622	99	96	27	69	0
VACCDSCAFF1	9223636	99	96	73	17	6
VACCDSCAFF1	9229495	99	94	25	59	10
VACCDSCAFF1	9229514	99	91	48	26	17
VACCDSCAFF1	9229551	99	94	18	68	8
VACCDSCAFF1	9229565	99	94	28	64	2
VACCDSCAFF1	9230808	99	91	29	36	26
VACCDSCAFF1	9230831	99	91	31	37	23
VACCDSCAFF1	9237238	99	97	54	43	0
VACCDSCAFF1	9275249	99	97	33	64	0
VACCDSCAFF1	9275260	99	97	44	47	6
VACCDSCAFF1	9275272	99	97	48	40	9
VACCDSCAFF1	9301661	99	91	20	5	66
VACCDSCAFF1	9301668	99	96	24	72	0
VACCDSCAFF1	9301812	99	95	31	53	11
VACCDSCAFF1	9301827	99	95	40	14	41
VACCDSCAFF1	9301834	99	95	32	16	47
VACCDSCAFF1	9301874	99	97	57	13	27
VACCDSCAFF1	9301876	99	97	57	15	25
VACCDSCAFF1	9301880	99	97	43	51	3
VACCDSCAFF1	9301894	99	97	17	80	0
VACCDSCAFF1	9301951	99	97	50	2	45
VACCDSCAFF1	9321036	99	97	18	1	78
VACCDSCAFF1	9321039	99	97	18	1	78
VACCDSCAFF1	9321064	99	97	43	15	39
VACCDSCAFF1	9337215	99	96	37	49	10
VACCDSCAFF1	9337219	99	96	12	84	0
VACCDSCAFF1	9337225	99	96	37	49	10
VACCDSCAFF1	9337246	99	96	55	29	12
VACCDSCAFF1	9337249	99	96	16	80	0
VACCDSCAFF1	9337391	99	96	11	85	0
VACCDSCAFF1	9337393	99	96	11	85	0
VACCDSCAFF1	9339406	99	98	19	65	14
VACCDSCAFF1	9339438	99	98	21	65	12
VACCDSCAFF1	9339444	99	98	22	65	11
VACCDSCAFF1	9339751	99	94	12	82	0
VACCDSCAFF1	9339855	99	95	34	46	15
VACCDSCAFF1	9349882	99	99	36	41	22
VACCDSCAFF1	9349951	99	99	41	36	22
VACCDSCAFF1	9350137	99	98	36	61	1
VACCDSCAFF1	9350164	99	97	27	69	1
VACCDSCAFF1	9350169	99	97	51	4	42
VACCDSCAFF1	9350201	99	97	28	68	1
VACCDSCAFF1	9350221	99	97	28	68	1
VACCDSCAFF1	9350225	99	97	28	68	1
VACCDSCAFF1	9350692	99	97	47	47	3
VACCDSCAFF1	9350710	99	97	39	19	39
VACCDSCAFF1	9350736	99	97	47	47	3
VACCDSCAFF1	9350737	99	97	23	73	1
VACCDSCAFF1	9350776	99	98	27	69	2
VACCDSCAFF1	9350806	99	98	31	40	27
VACCDSCAFF1	9350809	99	98	28	30	40
VACCDSCAFF1	9350832	99	98	30	28	40
VACCDSCAFF1	9364170	99	99	43	56	0
VACCDSCAFF1	9364181	99	99	96	1	2
VACCDSCAFF1	9364191	99	98	93	4	1
VACCDSCAFF1	9364197	99	98	93	4	1
VACCDSCAFF1	9364211	99	98	61	37	0
VACCDSCAFF1	9364213	99	98	66	32	0
VACCDSCAFF1	9364215	99	98	65	28	5
VACCDSCAFF1	9364220	99	98	57	41	0
VACCDSCAFF1	9364223	99	98	42	56	0
VACCDSCAFF1	9364255	99	99	55	44	0
VACCDSCAFF1	9364256	99	98	42	56	0
VACCDSCAFF1	9364267	99	99	44	55	0
VACCDSCAFF1	9364269	99	99	32	67	0
VACCDSCAFF1	9364273	99	98	94	1	3
VACCDSCAFF1	9364285	99	97	78	17	2
VACCDSCAFF1	9364286	99	97	80	15	2
VACCDSCAFF1	9364289	99	98	80	17	1
VACCDSCAFF1	9364292	99	98	15	83	0
VACCDSCAFF1	9364300	99	98	23	75	0
VACCDSCAFF1	9364301	99	98	73	24	1
VACCDSCAFF1	9364302	99	98	26	72	0
VACCDSCAFF1	9364328	99	98	34	63	1
VACCDSCAFF1	9364338	99	98	91	6	1
VACCDSCAFF1	9364343	99	98	26	72	0
VACCDSCAFF1	9364344	99	98	73	18	7
VACCDSCAFF1	9364381	99	95	31	26	38
VACCDSCAFF1	9364405	99	95	38	55	2
VACCDSCAFF1	9364417	99	95	38	39	18
VACCDSCAFF1	9364592	99	94	35	58	1
VACCDSCAFF1	9380057	99	97	35	61	1
VACCDSCAFF1	9380078	99	97	15	71	11
VACCDSCAFF1	9380082	99	97	38	58	1
VACCDSCAFF1	9380104	99	97	24	72	1
VACCDSCAFF1	9380118	99	97	40	56	1
VACCDSCAFF1	9380121	99	97	38	58	1
VACCDSCAFF1	9380122	99	97	83	4	10
VACCDSCAFF1	9380134	99	97	52	45	0
VACCDSCAFF1	9380136	99	97	88	4	5
VACCDSCAFF1	9402378	99	96	27	1	68
VACCDSCAFF1	9402381	99	96	25	0	71
VACCDSCAFF1	9402409	99	96	30	66	0
VACCDSCAFF1	9402411	99	96	48	45	3
VACCDSCAFF1	9402414	99	96	38	55	3
VACCDSCAFF1	9402421	99	96	25	0	71
VACCDSCAFF1	9411206	99	98	34	63	1
VACCDSCAFF1	9411207	99	98	60	0	38
VACCDSCAFF1	9411232	99	98	62	36	0
VACCDSCAFF1	9421734	99	97	15	73	9
VACCDSCAFF1	9421736	99	97	16	0	81
VACCDSCAFF1	9421779	99	97	17	0	80
VACCDSCAFF1	9421799	99	97	32	49	16
VACCDSCAFF1	9421803	99	97	10	0	87
VACCDSCAFF1	9421804	99	97	14	0	83
VACCDSCAFF1	9421829	99	96	12	2	82
VACCDSCAFF1	9421875	99	93	26	1	66
VACCDSCAFF1	9428167	99	90	24	65	1
VACCDSCAFF1	9465189	99	97	25	72	0
VACCDSCAFF1	9465193	99	97	15	82	0
VACCDSCAFF1	9465197	99	98	28	70	0
VACCDSCAFF1	9465200	99	98	61	37	0
VACCDSCAFF1	9465202	99	98	48	50	0
VACCDSCAFF1	9465206	99	98	46	52	0
VACCDSCAFF1	9465218	99	98	48	50	0
VACCDSCAFF1	9465220	99	98	46	52	0
VACCDSCAFF1	9465233	99	98	80	18	0
VACCDSCAFF1	9465246	99	98	79	0	19
VACCDSCAFF1	9465248	99	98	74	1	23
VACCDSCAFF1	9465249	99	98	49	37	12
VACCDSCAFF1	9465256	99	98	37	61	0
VACCDSCAFF1	9465257	99	98	29	69	0
VACCDSCAFF1	9465264	99	96	40	56	0
VACCDSCAFF1	9465271	99	94	46	47	1
VACCDSCAFF1	9485125	99	92	36	49	7
VACCDSCAFF1	9485130	99	93	36	52	5
VACCDSCAFF1	9485134	99	95	17	78	0
VACCDSCAFF1	9485136	99	95	18	77	0
VACCDSCAFF1	9485152	99	95	39	43	13
VACCDSCAFF1	9485156	99	95	31	1	63
VACCDSCAFF1	9485157	99	95	43	27	25
VACCDSCAFF1	9485162	99	95	40	47	8
VACCDSCAFF1	9485183	99	94	26	64	4
VACCDSCAFF1	9485236	99	90	17	72	1
VACCDSCAFF1	9485238	99	90	35	50	5
VACCDSCAFF1	9485250	99	92	45	40	7
VACCDSCAFF1	9485252	99	93	27	65	1
VACCDSCAFF1	9485253	99	95	13	81	1
VACCDSCAFF1	9485255	99	95	24	68	3
VACCDSCAFF1	9485258	99	95	52	36	7
VACCDSCAFF1	9485266	99	95	24	71	0
VACCDSCAFF1	9485267	99	95	25	66	4
VACCDSCAFF1	9485274	99	95	17	78	0
VACCDSCAFF1	9485284	99	95	26	68	1
VACCDSCAFF1	9485288	99	95	23	72	0
VACCDSCAFF1	9485290	99	95	26	5	64
VACCDSCAFF1	9498475	99	90	33	57	0
VACCDSCAFF1	9498488	99	95	52	13	30
VACCDSCAFF1	9498491	99	95	12	83	0
VACCDSCAFF1	9498496	99	96	12	84	0
VACCDSCAFF1	9498500	99	96	41	54	1
VACCDSCAFF1	9498514	99	96	64	26	6
VACCDSCAFF1	9498524	99	95	28	66	1
VACCDSCAFF1	9498592	99	95	43	49	3
VACCDSCAFF1	9498622	99	96	58	33	5
VACCDSCAFF1	9498638	99	96	59	31	6
VACCDSCAFF1	9500251	99	91	38	45	8
VACCDSCAFF1	9500257	99	92	31	33	28
VACCDSCAFF1	9500261	99	95	34	61	0
VACCDSCAFF1	9500266	99	95	40	50	5
VACCDSCAFF1	9500279	99	95	17	77	1
VACCDSCAFF1	9500285	99	95	29	65	1
VACCDSCAFF1	9500287	99	95	42	48	5
VACCDSCAFF1	9500296	99	95	18	76	1
VACCDSCAFF1	9500301	99	94	26	59	9
VACCDSCAFF1	9500319	99	92	27	60	5
[truncated: 90,050 more rows]

## Sheet: Table S3
Table S3. Eigenvalues for the first three principal components estimated for NHB, SHB, and 16-5 populations
Columns	EV = 9.24284	EV = 1.61531
BB-19	-0.108888	-0.132314
BB-20	-0.121958	-0.0876265
BB-21	-0.14241	-0.0402971
BB-23	-0.134199	-0.0656134
BB-30	-0.105701	-0.117899
BB-31	-0.132015	-0.0975889
BB-36	-0.128362	-0.0938693
BB-38	-0.147338	-0.0318261
BB-50	-0.106222	-0.0559601
BB-55	-0.12302	-0.0560121
NJ88-12-41	0.0705058	-0.292091
NJ88-14-3	0.0681715	-0.498737
BB-10	-0.146404	0.0419287
BB-11	-0.16475	0.0311505
BB-12	-0.0152759	0.00554483
BB-15	-0.163031	0.034011
BB-16	-0.163362	0.0393812
BB-3	-0.152461	0.0439194
BB-32	-0.157255	0.0270183
BB-33	-0.144647	0.0279343
BB-34	-0.162048	0.0440237
BB-35	-0.149174	0.0237863
BB-37	-0.15598	-0.019206
BB-39	-0.159255	-0.0155782
BB-4	-0.156628	0.0276209
BB-40	-0.0993218	-0.103687
BB-41	-0.131101	-0.093278
BB-42	-0.15502	0.051105
BB-48	-0.148986	-0.0711946
BB-5	-0.0429712	-0.00108286
BB-53	-0.166423	0.0365495
BB-54	-0.171178	0.0245811
BB-56	-0.155618	0.00205306
BB-6	-0.159821	-0.00697096
BB-7	-0.159582	0.046274
NJOPB-15	-0.0843358	0.229188
NJOPB-8	-0.0340373	0.383087
BNJ05-218-9	0.0709496	-0.157309
BNJ05-237-8	0.0710137	-0.157492
BNJ16-5-1	0.0750331	-0.0056957
BNJ16-5-10	0.0741836	-0.0293946
BNJ16-5-11	0.0572078	0.0843007
BNJ16-5-12	0.078679	-0.0119576
BNJ16-5-13	0.0699625	0.0293922
BNJ16-5-14	0.0650376	0.0601236
BNJ16-5-15	0.065558	-0.00503258
BNJ16-5-16	0.0736248	0.230837
BNJ16-5-17	0.0638824	0.0177301
BNJ16-5-18	0.0694715	0.0181124
BNJ16-5-19	0.0688765	0.0162486
BNJ16-5-2	0.0672246	0.0240677
BNJ16-5-20	0.0717945	-0.000743818
BNJ16-5-21	0.0727521	0.00302437
BNJ16-5-22	0.0685776	-0.00656372
BNJ16-5-23	0.0672558	0.0474209
BNJ16-5-24	0.0647478	0.0438853
BNJ16-5-25	0.0732322	0.00950999
BNJ16-5-26	0.0876372	-0.133434
BNJ16-5-27	0.0417106	0.0349988
BNJ16-5-28	0.0798403	-0.0683251
BNJ16-5-29	0.0635074	0.101529
BNJ16-5-3	0.0712337	0.0231644
BNJ16-5-30	0.0701554	0.0194393
BNJ16-5-31	0.0751389	-0.0199215
BNJ16-5-32	0.0658144	0.037262
BNJ16-5-33	0.0676967	0.0634967
BNJ16-5-34	0.0698984	0.0237358
BNJ16-5-35	0.0736159	-0.0154307
BNJ16-5-36	0.0762616	-0.0161353
BNJ16-5-37	0.0817752	-0.0156919
BNJ16-5-38	0.0658537	0.0164969
BNJ16-5-39	0.0766659	-0.00193492
BNJ16-5-4	0.069372	0.0329381
BNJ16-5-40	0.0823413	-0.0599574
BNJ16-5-41	0.0666318	0.0611707
BNJ16-5-42	0.0708276	0.0533264
BNJ16-5-43	0.0521118	0.0770646
BNJ16-5-44	0.0872397	-0.107802
BNJ16-5-45	0.0861104	-0.123051
BNJ16-5-46	0.0594864	0.0863222
BNJ16-5-47	0.0732869	0.00855832
BNJ16-5-48	0.0397	0.145658
BNJ16-5-49	0.0749005	0.00546265
BNJ16-5-5	0.0714382	0.0243305
BNJ16-5-50	0.0721845	-0.00333673
BNJ16-5-51	0.0552696	0.109562
BNJ16-5-52	0.0778844	-0.0817397
BNJ16-5-53	0.0799996	-0.105662
BNJ16-5-54	0.0621557	0.0757522
BNJ16-5-55	0.0702358	-0.0524242
BNJ16-5-56	0.0659809	0.0460898
BNJ16-5-57	0.0730152	0.00248412
BNJ16-5-58	0.0724625	-0.0319556
BNJ16-5-59	0.0642247	-0.00942019
BNJ16-5-6	0.0691387	0.044331
BNJ16-5-60	0.0806616	-0.0690889
BNJ16-5-7	0.0745457	0.000321634
BNJ16-5-8	0.06708	0.0404043
BNJ16-5-9	0.0827738	-0.0262379

## Sheet:  Table S4
Table S4. Pairwise FST values of NHB and SHB cultivars across all the scaffolds
Marker	Chromosome	Position	SHB_NHB
S1_40695376	VaccDscaff1	40695376	0.719007
S1_40695375	VaccDscaff1	40695375	0.676484
S7_6586958	VaccDscaff7	6586958	0.66782
S20_15103249	VaccDscaff20	15103249	0.643547
S22_505549	VaccDscaff22	505549	0.642459
S12_35232130	VaccDscaff12	35232130	0.640278
S1_21694667	VaccDscaff1	21694667	0.633914
S7_20665719	VaccDscaff7	20665719	0.630187
S1_24602454	VaccDscaff1	24602454	0.610218
S1_20431187	VaccDscaff1	20431187	0.600998
S2_24989765	VaccDscaff2	24989765	0.59864
S7_14568068	VaccDscaff7	14568068	0.591757
S7_14568121	VaccDscaff7	14568121	0.591757
S12_12383971	VaccDscaff12	12383971	0.584628
S20_37810973	VaccDscaff20	37810973	0.584628
S22_441978	VaccDscaff22	441978	0.583662
S12_12377419	VaccDscaff12	12377419	0.583456
S1_23738682	VaccDscaff1	23738682	0.577475
S1_29023330	VaccDscaff1	29023330	0.577475
S22_478381	VaccDscaff22	478381	0.577475
S7_32916035	VaccDscaff7	32916035	0.577241
S22_13601930	VaccDscaff22	13601930	0.575432
S4_2855557	VaccDscaff4	2855557	0.570869
S1_24860723	VaccDscaff1	24860723	0.569489
S12_11586905	VaccDscaff12	11586905	0.567481
S21_35851437	VaccDscaff21	35851437	0.565614
S21_35851438	VaccDscaff21	35851438	0.565614
S21_35851440	VaccDscaff21	35851440	0.565614
S1_23137318	VaccDscaff1	23137318	0.563714
S1_24602410	VaccDscaff1	24602410	0.558649
S1_24870823	VaccDscaff1	24870823	0.558649
S22_555393	VaccDscaff22	555393	0.558649
S13_27008713	VaccDscaff13	27008713	0.557773
S22_688012	VaccDscaff22	688012	0.557218
S11_20174152	VaccDscaff11	20174152	0.556119
S11_20174203	VaccDscaff11	20174203	0.556119
S20_14369063	VaccDscaff20	14369063	0.555192
S7_14434217	VaccDscaff7	14434217	0.555168
S13_4247528	VaccDscaff13	4247528	0.555168
S13_22967505	VaccDscaff13	22967505	0.555104
S21_35851567	VaccDscaff21	35851567	0.555104
S7_8616210	VaccDscaff7	8616210	0.554188
S22_1034634	VaccDscaff22	1034634	0.553063
S22_846853	VaccDscaff22	846853	0.552623
S2_11515294	VaccDscaff2	11515294	0.550761
S6_33398465	VaccDscaff6	33398465	0.5494
S7_14432796	VaccDscaff7	14432796	0.548023
S7_14586789	VaccDscaff7	14586789	0.548023
S7_14586792	VaccDscaff7	14586792	0.548023
S7_14586810	VaccDscaff7	14586810	0.548023
S7_16666630	VaccDscaff7	16666630	0.548023
S11_31862937	VaccDscaff11	31862937	0.548023
S1_14880053	VaccDscaff1	14880053	0.548023
S13_14347212	VaccDscaff13	14347212	0.548023
S7_24726358	VaccDscaff7	24726358	0.547621
S11_22064526	VaccDscaff11	22064526	0.545396
S12_35131793	VaccDscaff12	35131793	0.543418
S12_35131794	VaccDscaff12	35131794	0.543418
S6_18661507	VaccDscaff6	18661507	0.542519
S13_24941367	VaccDscaff13	24941367	0.541974
S22_749440	VaccDscaff22	749440	0.540727
S1_25330528	VaccDscaff1	25330528	0.540611
S7_14607396	VaccDscaff7	14607396	0.540611
S20_14978466	VaccDscaff20	14978466	0.540611
S20_26912470	VaccDscaff20	26912470	0.537282
S1_24576408	VaccDscaff1	24576408	0.536155
S6_29640794	VaccDscaff6	29640794	0.536155
S2_9052395	VaccDscaff2	9052395	0.536153
S2_9052399	VaccDscaff2	9052399	0.536153
S2_20359348	VaccDscaff2	20359348	0.53582
S4_8479888	VaccDscaff4	8479888	0.53582
S13_32023695	VaccDscaff13	32023695	0.533268
S1_21842172	VaccDscaff1	21842172	0.532068
S1_23738657	VaccDscaff1	23738657	0.532068
S1_26787079	VaccDscaff1	26787079	0.532068
S1_28450801	VaccDscaff1	28450801	0.532068
S7_6366952	VaccDscaff7	6366952	0.532068
S7_6418192	VaccDscaff7	6418192	0.532068
S20_17626365	VaccDscaff20	17626365	0.532068
S20_19971250	VaccDscaff20	19971250	0.532068
S22_7742458	VaccDscaff22	7742458	0.532068
S11_37718752	VaccDscaff11	37718752	0.531024
S13_39426004	VaccDscaff13	39426004	0.530821
S7_8859038	VaccDscaff7	8859038	0.52972
S7_8859061	VaccDscaff7	8859061	0.52972
S7_8859064	VaccDscaff7	8859064	0.52972
S2_28964218	VaccDscaff2	28964218	0.52928
S22_3345319	VaccDscaff22	3345319	0.52928
S2_9052433	VaccDscaff2	9052433	0.529166
S2_9052480	VaccDscaff2	9052480	0.529166
S22_8155	VaccDscaff22	8155	0.527995
S1_33243589	VaccDscaff1	33243589	0.527977
S6_650503	VaccDscaff6	650503	0.527977
S22_55684	VaccDscaff22	55684	0.527977
S2_29629010	VaccDscaff2	29629010	0.527953
S7_16349067	VaccDscaff7	16349067	0.527953
S6_12462798	VaccDscaff6	12462798	0.524562
S7_6354600	VaccDscaff7	6354600	0.524562
S7_8523428	VaccDscaff7	8523428	0.524562
S7_9197988	VaccDscaff7	9197988	0.524562
S13_21950616	VaccDscaff13	21950616	0.524562
S22_596792	VaccDscaff22	596792	0.524562
S22_608968	VaccDscaff22	608968	0.524562
S1_23745322	VaccDscaff1	23745322	0.523737
S6_26610914	VaccDscaff6	26610914	0.523737
S20_17910032	VaccDscaff20	17910032	0.523737
S20_23355648	VaccDscaff20	23355648	0.523737
S22_2141801	VaccDscaff22	2141801	0.523737
S2_18431501	VaccDscaff2	18431501	0.522959
S6_14942206	VaccDscaff6	14942206	0.519756
S6_19673841	VaccDscaff6	19673841	0.519756
S13_22967430	VaccDscaff13	22967430	0.519474
S13_22967459	VaccDscaff13	22967459	0.519474
S20_12515700	VaccDscaff20	12515700	0.519474
S20_13201875	VaccDscaff20	13201875	0.519474
S7_28683648	VaccDscaff7	28683648	0.519343
S20_9726339	VaccDscaff20	9726339	0.519343
S6_34140950	VaccDscaff6	34140950	0.51695
S6_34141074	VaccDscaff6	34141074	0.51695
S6_34141084	VaccDscaff6	34141084	0.51695
S1_17850614	VaccDscaff1	17850614	0.516364
S1_17850615	VaccDscaff1	17850615	0.516364
S1_17850620	VaccDscaff1	17850620	0.516364
S1_17850622	VaccDscaff1	17850622	0.516364
S1_20420628	VaccDscaff1	20420628	0.51548
S1_26754328	VaccDscaff1	26754328	0.51548
S1_31931772	VaccDscaff1	31931772	0.51548
S7_41062786	VaccDscaff7	41062786	0.51548
S13_27169609	VaccDscaff13	27169609	0.51548
S21_31742424	VaccDscaff21	31742424	0.51548
S21_31742432	VaccDscaff21	31742432	0.51548
S21_31742447	VaccDscaff21	31742447	0.51548
S6_8408007	VaccDscaff6	8408007	0.51514
S20_30507045	VaccDscaff20	30507045	0.515069
S1_29557005	VaccDscaff1	29557005	0.512316
S1_20007818	VaccDscaff1	20007818	0.51162
S7_41208664	VaccDscaff7	41208664	0.510622
S6_10169829	VaccDscaff6	10169829	0.509958
S11_28929377	VaccDscaff11	28929377	0.509958
S20_11663623	VaccDscaff20	11663623	0.509901
S2_23981514	VaccDscaff2	23981514	0.507767
S6_30870389	VaccDscaff6	30870389	0.507767
S7_33975054	VaccDscaff7	33975054	0.507767
S7_37479381	VaccDscaff7	37479381	0.507767
S22_9223579	VaccDscaff22	9223579	0.507767
S12_11545154	VaccDscaff12	11545154	0.507639
S12_26624573	VaccDscaff12	26624573	0.507639
S22_11970803	VaccDscaff22	11970803	0.507639
S13_22967446	VaccDscaff13	22967446	0.506355
S2_27246092	VaccDscaff2	27246092	0.502805
S6_8154592	VaccDscaff6	8154592	0.502591
S6_9299178	VaccDscaff6	9299178	0.502591
S6_23243693	VaccDscaff6	23243693	0.502591
S6_34625126	VaccDscaff6	34625126	0.502591
S7_6970906	VaccDscaff7	6970906	0.502591
S7_38397749	VaccDscaff7	38397749	0.502591
S20_18646315	VaccDscaff20	18646315	0.502591
S20_19175451	VaccDscaff20	19175451	0.502591
S22_12878575	VaccDscaff22	12878575	0.502591
S4_10253437	VaccDscaff4	10253437	0.501955
S13_22253172	VaccDscaff13	22253172	0.501865
S6_15448660	VaccDscaff6	15448660	0.500364
S6_15448661	VaccDscaff6	15448661	0.500364
S6_15448725	VaccDscaff6	15448725	0.500364
S21_36859603	VaccDscaff21	36859603	0.500364
S6_10283563	VaccDscaff6	10283563	0.499753
S1_17911327	VaccDscaff1	17911327	0.497918
S6_21284062	VaccDscaff6	21284062	0.497633
S6_21284087	VaccDscaff6	21284087	0.497633
S21_36395969	VaccDscaff21	36395969	0.497633
S2_11515253	VaccDscaff2	11515253	0.497408
S6_33586202	VaccDscaff6	33586202	0.497408
S2_22850454	VaccDscaff2	22850454	0.494988
S6_11639708	VaccDscaff6	11639708	0.494988
S7_14607544	VaccDscaff7	14607544	0.494988
S7_22039840	VaccDscaff7	22039840	0.494988
S7_22039844	VaccDscaff7	22039844	0.494988
S7_24710339	VaccDscaff7	24710339	0.494988
S11_22201819	VaccDscaff11	22201819	0.494988
S12_14097966	VaccDscaff12	14097966	0.494988
S17_38669786	VaccDscaff17	38669786	0.494988
S20_2229443	VaccDscaff20	2229443	0.494988
S20_18558830	VaccDscaff20	18558830	0.494988
S20_19930004	VaccDscaff20	19930004	0.494988
S20_19943557	VaccDscaff20	19943557	0.494988
S6_24585051	VaccDscaff6	24585051	0.494065
S1_16087926	VaccDscaff1	16087926	0.49327
S1_23744913	VaccDscaff1	23744913	0.49327
S4_16056056	VaccDscaff4	16056056	0.49327
S7_24525548	VaccDscaff7	24525548	0.49327
S7_30090146	VaccDscaff7	30090146	0.49327
S20_16645876	VaccDscaff20	16645876	0.49327
S21_27993440	VaccDscaff21	27993440	0.49327
S2_18769456	VaccDscaff2	18769456	0.492726
S7_13299155	VaccDscaff7	13299155	0.492726
S7_32915959	VaccDscaff7	32915959	0.492726
S7_41001403	VaccDscaff7	41001403	0.492726
S2_20359394	VaccDscaff2	20359394	0.489606
S1_42117195	VaccDscaff1	42117195	0.489537
S13_28169238	VaccDscaff13	28169238	0.489537
S20_25011491	VaccDscaff20	25011491	0.489537
S20_29053452	VaccDscaff20	29053452	0.489537
S1_28449203	VaccDscaff1	28449203	0.489537
S2_28326113	VaccDscaff2	28326113	0.489537
S2_35309079	VaccDscaff2	35309079	0.489537
S2_33264234	VaccDscaff2	33264234	0.489317
S7_7863240	VaccDscaff7	7863240	0.489317
S2_30016243	VaccDscaff2	30016243	0.488414
S1_39986789	VaccDscaff1	39986789	0.487137
S17_10946858	VaccDscaff17	10946858	0.487137
S22_166965	VaccDscaff22	166965	0.487137
S6_10778933	VaccDscaff6	10778933	0.485755
S12_9501899	VaccDscaff12	9501899	0.485755
S1_9644931	VaccDscaff1	9644931	0.485005
S1_23744779	VaccDscaff1	23744779	0.485005
S1_23744916	VaccDscaff1	23744916	0.485005
S1_33831222	VaccDscaff1	33831222	0.485005
S1_33831264	VaccDscaff1	33831264	0.485005
S2_26854230	VaccDscaff2	26854230	0.485005
S6_188398	VaccDscaff6	188398	0.485005
S6_650498	VaccDscaff6	650498	0.485005
S6_650524	VaccDscaff6	650524	0.485005
S6_11971882	VaccDscaff6	11971882	0.485005
S7_6970887	VaccDscaff7	6970887	0.485005
S7_21170103	VaccDscaff7	21170103	0.485005
S7_21170116	VaccDscaff7	21170116	0.485005
S7_21934075	VaccDscaff7	21934075	0.485005
S7_28068954	VaccDscaff7	28068954	0.485005
S7_29410394	VaccDscaff7	29410394	0.485005
S7_34934527	VaccDscaff7	34934527	0.485005
S11_24406971	VaccDscaff11	24406971	0.485005
S11_31862933	VaccDscaff11	31862933	0.485005
S13_39434761	VaccDscaff13	39434761	0.485005
S20_14226315	VaccDscaff20	14226315	0.485005
S20_16645879	VaccDscaff20	16645879	0.485005
S20_16645883	VaccDscaff20	16645883	0.485005
S20_19803520	VaccDscaff20	19803520	0.485005
S21_29235461	VaccDscaff21	29235461	0.485005
S22_31374027	VaccDscaff22	31374027	0.485005
S2_9052527	VaccDscaff2	9052527	0.484904
S13_15862897	VaccDscaff13	15862897	0.484904
S13_15862971	VaccDscaff13	15862971	0.484904
S21_37130345	VaccDscaff21	37130345	0.484904
S21_37130383	VaccDscaff21	37130383	0.484904
S21_37130421	VaccDscaff21	37130421	0.484904
S4_5754594	VaccDscaff4	5754594	0.48487
S13_24292038	VaccDscaff13	24292038	0.484599
S13_32023699	VaccDscaff13	32023699	0.484599
S13_23989557	VaccDscaff13	23989557	0.484028
S13_31979405	VaccDscaff13	31979405	0.482972
S20_2317460	VaccDscaff20	2317460	0.482131
S7_8859090	VaccDscaff7	8859090	0.481856
S20_9455433	VaccDscaff20	9455433	0.481542
S6_21201730	VaccDscaff6	21201730	0.481145
S7_14466286	VaccDscaff7	14466286	0.481145
S7_14466337	VaccDscaff7	14466337	0.481145
S7_38314816	VaccDscaff7	38314816	0.481145
S2_24959660	VaccDscaff2	24959660	0.480804
S17_37893068	VaccDscaff17	37893068	0.480804
S17_37893084	VaccDscaff17	37893084	0.480804
S6_24836924	VaccDscaff6	24836924	0.480468
S4_40633097	VaccDscaff4	40633097	0.476875
S7_29120888	VaccDscaff7	29120888	0.476875
S1_19573550	VaccDscaff1	19573550	0.476751
S1_19573552	VaccDscaff1	19573552	0.476751
S1_19573555	VaccDscaff1	19573555	0.476751
S1_25832065	VaccDscaff1	25832065	0.476751
S1_30444685	VaccDscaff1	30444685	0.476751
S2_2782232	VaccDscaff2	2782232	0.476751
S6_7863871	VaccDscaff6	7863871	0.476751
S6_10133184	VaccDscaff6	10133184	0.476751
S6_23240868	VaccDscaff6	23240868	0.476751
S6_25551658	VaccDscaff6	25551658	0.476751
S7_6358745	VaccDscaff7	6358745	0.476751
S20_14193439	VaccDscaff20	14193439	0.476751
S20_25145125	VaccDscaff20	25145125	0.476751
S21_28807049	VaccDscaff21	28807049	0.476751
S22_446285	VaccDscaff22	446285	0.476751
S1_25019606	VaccDscaff1	25019606	0.476431
S1_25019707	VaccDscaff1	25019707	0.476431
S1_26012507	VaccDscaff1	26012507	0.476431
S1_26012512	VaccDscaff1	26012512	0.476431
S1_26035475	VaccDscaff1	26035475	0.476431
S2_10567043	VaccDscaff2	10567043	0.476431
S2_31178264	VaccDscaff2	31178264	0.476431
S6_27099367	VaccDscaff6	27099367	0.476431
S6_33441874	VaccDscaff6	33441874	0.476431
S7_8455617	VaccDscaff7	8455617	0.476431
S7_21919142	VaccDscaff7	21919142	0.476431
S7_28697686	VaccDscaff7	28697686	0.476431
S7_29120842	VaccDscaff7	29120842	0.476431
S12_12619606	VaccDscaff12	12619606	0.476431
S12_16294405	VaccDscaff12	16294405	0.476431
S20_19806900	VaccDscaff20	19806900	0.476431
S20_25149262	VaccDscaff20	25149262	0.476431
S21_34046648	VaccDscaff21	34046648	0.476431
S22_441823	VaccDscaff22	441823	0.476431
S6_22121796	VaccDscaff6	22121796	0.475228
S13_20759327	VaccDscaff13	20759327	0.475228
S13_20759328	VaccDscaff13	20759328	0.475228
S1_23655728	VaccDscaff1	23655728	0.474978
S1_23655761	VaccDscaff1	23655761	0.474978
S1_23659656	VaccDscaff1	23659656	0.474978
S2_26391780	VaccDscaff2	26391780	0.474978
S6_23699161	VaccDscaff6	23699161	0.474978
S6_24223170	VaccDscaff6	24223170	0.474978
S6_25551647	VaccDscaff6	25551647	0.474978
S13_15972522	VaccDscaff13	15972522	0.474978
S13_15972569	VaccDscaff13	15972569	0.474978
S1_23744813	VaccDscaff1	23744813	0.474627
S22_284789	VaccDscaff22	284789	0.474046
S4_42253568	VaccDscaff4	42253568	0.473414
S6_28049249	VaccDscaff6	28049249	0.472695
S13_39483561	VaccDscaff13	39483561	0.472695
S7_39053999	VaccDscaff7	39053999	0.472434
S1_14824112	VaccDscaff1	14824112	0.471713
S6_14800957	VaccDscaff6	14800957	0.471713
S7_14678841	VaccDscaff7	14678841	0.471713
S20_15956673	VaccDscaff20	15956673	0.471713
S2_26422088	VaccDscaff2	26422088	0.471595
S2_27961322	VaccDscaff2	27961322	0.471595
S1_17850584	VaccDscaff1	17850584	0.471292
S1_19563311	VaccDscaff1	19563311	0.471292
S12_38236026	VaccDscaff12	38236026	0.470931
S6_966396	VaccDscaff6	966396	0.470584
S12_35925490	VaccDscaff12	35925490	0.469556
S1_25838512	VaccDscaff1	25838512	0.468466
S2_10522624	VaccDscaff2	10522624	0.468466
S7_14641621	VaccDscaff7	14641621	0.468466
S7_14641720	VaccDscaff7	14641720	0.468466
S17_35995973	VaccDscaff17	35995973	0.468466
S1_14152806	VaccDscaff1	14152806	0.467526
S12_37643109	VaccDscaff12	37643109	0.467526
S17_38497636	VaccDscaff17	38497636	0.467526
S1_18305093	VaccDscaff1	18305093	0.4674
S1_20375484	VaccDscaff1	20375484	0.467374
S1_24499486	VaccDscaff1	24499486	0.467374
S2_24328046	VaccDscaff2	24328046	0.467374
S2_24328079	VaccDscaff2	24328079	0.467374
S11_27623242	VaccDscaff11	27623242	0.467374
S13_23465961	VaccDscaff13	23465961	0.467374
S20_30364825	VaccDscaff20	30364825	0.467374
S20_30364834	VaccDscaff20	30364834	0.467374
S20_30364871	VaccDscaff20	30364871	0.467374
S1_20043805	VaccDscaff1	20043805	0.467374
S1_25295710	VaccDscaff1	25295710	0.467374
S1_25832089	VaccDscaff1	25832089	0.467374
S2_25035276	VaccDscaff2	25035276	0.467374
S6_19704369	VaccDscaff6	19704369	0.467374
S6_23479879	VaccDscaff6	23479879	0.467374
S6_26806069	VaccDscaff6	26806069	0.467374
S7_41213937	VaccDscaff7	41213937	0.467374
S11_27623225	VaccDscaff11	27623225	0.467374
S11_27623234	VaccDscaff11	27623234	0.467374
S12_12619577	VaccDscaff12	12619577	0.467374
S20_13124062	VaccDscaff20	13124062	0.467374
S22_2141836	VaccDscaff22	2141836	0.467374
S22_14380506	VaccDscaff22	14380506	0.467374
S13_28191335	VaccDscaff13	28191335	0.467154
S6_11986560	VaccDscaff6	11986560	0.46708
S7_18565229	VaccDscaff7	18565229	0.46708
S11_24446951	VaccDscaff11	24446951	0.46708
S22_9845038	VaccDscaff22	9845038	0.46708
S2_24623788	VaccDscaff2	24623788	0.46699
S4_11929450	VaccDscaff4	11929450	0.46699
S4_11929504	VaccDscaff4	11929504	0.46699
S21_27379125	VaccDscaff21	27379125	0.46699
S21_27379263	VaccDscaff21	27379263	0.46699
S13_23989436	VaccDscaff13	23989436	0.466048
S2_27246131	VaccDscaff2	27246131	0.465935
S2_27246132	VaccDscaff2	27246132	0.465935
S2_27246133	VaccDscaff2	27246133	0.465935
S1_21809266	VaccDscaff1	21809266	0.464925
S2_25035138	VaccDscaff2	25035138	0.464925
S7_41233067	VaccDscaff7	41233067	0.464925
S7_41233157	VaccDscaff7	41233157	0.464925
S13_2597487	VaccDscaff13	2597487	0.46371
S1_30870223	VaccDscaff1	30870223	0.463148
S2_29891312	VaccDscaff2	29891312	0.463148
S2_40767252	VaccDscaff2	40767252	0.463148
S6_966371	VaccDscaff6	966371	0.463148
S6_28346417	VaccDscaff6	28346417	0.463148
S7_14893042	VaccDscaff7	14893042	0.463148
S7_23761703	VaccDscaff7	23761703	0.463148
S21_30271728	VaccDscaff21	30271728	0.463148
S2_20750329	VaccDscaff2	20750329	0.46278
S4_36215624	VaccDscaff4	36215624	0.46278
S6_39777860	VaccDscaff6	39777860	0.46278
S17_10693687	VaccDscaff17	10693687	0.46278
S1_20907350	VaccDscaff1	20907350	0.462613
S4_40774915	VaccDscaff4	40774915	0.462613
S7_14735415	VaccDscaff7	14735415	0.462029
S13_29812339	VaccDscaff13	29812339	0.461996
S2_23221971	VaccDscaff2	23221971	0.461201
S2_34298885	VaccDscaff2	34298885	0.461201
S2_35309091	VaccDscaff2	35309091	0.461201
S4_37475126	VaccDscaff4	37475126	0.461201
S6_11986487	VaccDscaff6	11986487	0.461201
S7_14432864	VaccDscaff7	14432864	0.461201
S7_33987390	VaccDscaff7	33987390	0.461201
S11_21012713	VaccDscaff11	21012713	0.461201
S17_35808895	VaccDscaff17	35808895	0.461201
S20_31274973	VaccDscaff20	31274973	0.461201
S21_28785405	VaccDscaff21	28785405	0.461201
S22_2499053	VaccDscaff22	2499053	0.461201
S1_25302782	VaccDscaff1	25302782	0.461079
S7_7201003	VaccDscaff7	7201003	0.461079
S7_10411608	VaccDscaff7	10411608	0.461079
S13_30867330	VaccDscaff13	30867330	0.461079
S2_34125861	VaccDscaff2	34125861	0.459819
S7_19498990	VaccDscaff7	19498990	0.459819
S7_41003195	VaccDscaff7	41003195	0.459819
S7_41078158	VaccDscaff7	41078158	0.459819
S12_398204	VaccDscaff12	398204	0.459819
S12_398224	VaccDscaff12	398224	0.459819
S12_38577648	VaccDscaff12	38577648	0.459819
S22_649752	VaccDscaff22	649752	0.459819
S1_20375452	VaccDscaff1	20375452	0.457593
S12_12018499	VaccDscaff12	12018499	0.457593
S2_27246087	VaccDscaff2	27246087	0.45723
S2_27246115	VaccDscaff2	27246115	0.45723
S2_11515191	VaccDscaff2	11515191	0.455313
S2_15371663	VaccDscaff2	15371663	0.455313
S2_15407559	VaccDscaff2	15407559	0.455313
S2_15501502	VaccDscaff2	15501502	0.455313
S2_16621113	VaccDscaff2	16621113	0.455313
S2_17414864	VaccDscaff2	17414864	0.455313
S2_19805298	VaccDscaff2	19805298	0.455313
S2_20590836	VaccDscaff2	20590836	0.455313
S2_31683915	VaccDscaff2	31683915	0.455313
S4_35936302	VaccDscaff4	35936302	0.455313
S4_35936311	VaccDscaff4	35936311	0.455313
S6_12386970	VaccDscaff6	12386970	0.455313
S6_28030407	VaccDscaff6	28030407	0.455313
S12_39001711	VaccDscaff12	39001711	0.455313
S20_25006426	VaccDscaff20	25006426	0.455313
S21_16605042	VaccDscaff21	16605042	0.455313
S21_32612047	VaccDscaff21	32612047	0.455313
S21_4724628	VaccDscaff21	4724628	0.455236
S22_11970790	VaccDscaff22	11970790	0.455236
S22_284565	VaccDscaff22	284565	0.454921
S2_43788409	VaccDscaff2	43788409	0.454687
S1_23744246	VaccDscaff1	23744246	0.454403
S1_9301661	VaccDscaff1	9301661	0.454276
S7_32068901	VaccDscaff7	32068901	0.454276
S7_34968853	VaccDscaff7	34968853	0.454276
S12_35925718	VaccDscaff12	35925718	0.454276
S1_29023424	VaccDscaff1	29023424	0.453725
S2_25901056	VaccDscaff2	25901056	0.453725
S2_25901058	VaccDscaff2	25901058	0.453725
S6_4315388	VaccDscaff6	4315388	0.453725
S7_14467960	VaccDscaff7	14467960	0.453725
S7_14467965	VaccDscaff7	14467965	0.453725
S7_17466834	VaccDscaff7	17466834	0.453725
S7_22039860	VaccDscaff7	22039860	0.453725
S12_398260	VaccDscaff12	398260	0.453725
S12_39505091	VaccDscaff12	39505091	0.453725
S20_4502876	VaccDscaff20	4502876	0.453725
S7_14539007	VaccDscaff7	14539007	0.453598
S17_18640800	VaccDscaff17	18640800	0.453378
S6_25549770	VaccDscaff6	25549770	0.453186
S6_33879406	VaccDscaff6	33879406	0.453142
S6_33879420	VaccDscaff6	33879420	0.453142
S2_36643294	VaccDscaff2	36643294	0.452537
S1_11297580	VaccDscaff1	11297580	0.451683
S1_28486135	VaccDscaff1	28486135	0.450384
S12_12561332	VaccDscaff12	12561332	0.450384
S13_21775930	VaccDscaff13	21775930	0.450384
S2_31176937	VaccDscaff2	31176937	0.449487
S7_25084969	VaccDscaff7	25084969	0.449487
S7_25153579	VaccDscaff7	25153579	0.449487
S13_14485091	VaccDscaff13	14485091	0.449418
S2_27246180	VaccDscaff2	27246180	0.448775
S13_24941414	VaccDscaff13	24941414	0.448775
S22_1703009	VaccDscaff22	1703009	0.448483
S2_5801824	VaccDscaff2	5801824	0.447622
S2_16985712	VaccDscaff2	16985712	0.447622
S2_18429605	VaccDscaff2	18429605	0.447622
S2_19939912	VaccDscaff2	19939912	0.447622
S2_19940039	VaccDscaff2	19940039	0.447622
S7_9200648	VaccDscaff7	9200648	0.447622
S7_23130641	VaccDscaff7	23130641	0.447622
S7_33253116	VaccDscaff7	33253116	0.447622
S7_33253119	VaccDscaff7	33253119	0.447622
S7_35548748	VaccDscaff7	35548748	0.447622
S7_37007026	VaccDscaff7	37007026	0.447622
S11_22201842	VaccDscaff11	22201842	0.447622
S11_38760671	VaccDscaff11	38760671	0.447622
S11_38762102	VaccDscaff11	38762102	0.447622
S11_39505362	VaccDscaff11	39505362	0.447622
S12_12763995	VaccDscaff12	12763995	0.447622
S13_20784438	VaccDscaff13	20784438	0.447622
S17_31639398	VaccDscaff17	31639398	0.447622
S17_38566793	VaccDscaff17	38566793	0.447622
S20_1294417	VaccDscaff20	1294417	0.447622
S20_17507303	VaccDscaff20	17507303	0.447622
S20_23263297	VaccDscaff20	23263297	0.447622
S20_24541255	VaccDscaff20	24541255	0.447622
S20_33101203	VaccDscaff20	33101203	0.447622
S21_7350468	VaccDscaff21	7350468	0.447622
S21_7350510	VaccDscaff21	7350510	0.447622
S21_24895035	VaccDscaff21	24895035	0.447622
S21_27416365	VaccDscaff21	27416365	0.447622
S21_32276235	VaccDscaff21	32276235	0.447622
S22_16472910	VaccDscaff22	16472910	0.447622
S4_219773	VaccDscaff4	219773	0.44723
S6_20908637	VaccDscaff6	20908637	0.44723
S12_36890386	VaccDscaff12	36890386	0.44723
S1_17994079	VaccDscaff1	17994079	0.44632
S1_18952789	VaccDscaff1	18952789	0.44632
S6_23240864	VaccDscaff6	23240864	0.44632
S7_41147709	VaccDscaff7	41147709	0.446283
S7_41147713	VaccDscaff7	41147713	0.446283
S7_13299245	VaccDscaff7	13299245	0.446027
S7_14467967	VaccDscaff7	14467967	0.446027
S1_24354415	VaccDscaff1	24354415	0.445203
S2_10564407	VaccDscaff2	10564407	0.444604
S2_20750339	VaccDscaff2	20750339	0.444604
S6_11973173	VaccDscaff6	11973173	0.444604
S6_11973272	VaccDscaff6	11973272	0.444604
S7_6368008	VaccDscaff7	6368008	0.444604
S20_19039472	VaccDscaff20	19039472	0.444604
S20_19725879	VaccDscaff20	19725879	0.444604
S20_25023747	VaccDscaff20	25023747	0.444604
S7_41053225	VaccDscaff7	41053225	0.443031
S7_41143213	VaccDscaff7	41143213	0.443031
S22_10009520	VaccDscaff22	10009520	0.443031
S12_34750542	VaccDscaff12	34750542	0.442773
S12_34750550	VaccDscaff12	34750550	0.442773
S12_35132032	VaccDscaff12	35132032	0.442773
S2_10173771	VaccDscaff2	10173771	0.441512
S2_24623808	VaccDscaff2	24623808	0.441512
S7_9058871	VaccDscaff7	9058871	0.441512
S11_24302271	VaccDscaff11	24302271	0.441512
S13_37143288	VaccDscaff13	37143288	0.441512
S1_14681228	VaccDscaff1	14681228	0.441262
S1_33714415	VaccDscaff1	33714415	0.441262
S2_33295276	VaccDscaff2	33295276	0.441262
S2_44337247	VaccDscaff2	44337247	0.441262
S6_34171044	VaccDscaff6	34171044	0.441262
S7_37191197	VaccDscaff7	37191197	0.441262
S7_41351312	VaccDscaff7	41351312	0.441262
S20_14226322	VaccDscaff20	14226322	0.441262
S20_14408044	VaccDscaff20	14408044	0.441262
S22_11052063	VaccDscaff22	11052063	0.441262
S22_14693145	VaccDscaff22	14693145	0.441262
S6_9253841	VaccDscaff6	9253841	0.440905
S22_3687441	VaccDscaff22	3687441	0.440171
S20_11781619	VaccDscaff20	11781619	0.439714
S20_11781651	VaccDscaff20	11781651	0.439714
S2_10263469	VaccDscaff2	10263469	0.439695
S2_11515192	VaccDscaff2	11515192	0.439695
S2_17158208	VaccDscaff2	17158208	0.439695
S2_23978422	VaccDscaff2	23978422	0.439695
S2_30909404	VaccDscaff2	30909404	0.439695
S7_16100684	VaccDscaff7	16100684	0.439695
S22_11343231	VaccDscaff22	11343231	0.439695
S2_24668225	VaccDscaff2	24668225	0.438974
S1_21917014	VaccDscaff1	21917014	0.438962
S13_25823000	VaccDscaff13	25823000	0.438962
S17_1233977	VaccDscaff17	1233977	0.438962
S6_20402827	VaccDscaff6	20402827	0.438002
S7_14431935	VaccDscaff7	14431935	0.438002
S7_41122498	VaccDscaff7	41122498	0.438002
S1_13328886	VaccDscaff1	13328886	0.437054
S20_22340011	VaccDscaff20	22340011	0.437054
S22_11970829	VaccDscaff22	11970829	0.437054
S2_26454699	VaccDscaff2	26454699	0.436602
S6_24127814	VaccDscaff6	24127814	0.436348
S1_17861581	VaccDscaff1	17861581	0.436348
S13_27008565	VaccDscaff13	27008565	0.436268
S2_8900667	VaccDscaff2	8900667	0.436199
S2_8906381	VaccDscaff2	8906381	0.436199
S2_8912188	VaccDscaff2	8912188	0.436199
S2_37556132	VaccDscaff2	37556132	0.436199
S2_39790448	VaccDscaff2	39790448	0.436199
S4_13610218	VaccDscaff4	13610218	0.436199
S6_188316	VaccDscaff6	188316	0.436199
S6_4116972	VaccDscaff6	4116972	0.436199
S6_4935324	VaccDscaff6	4935324	0.436199
S6_8886609	VaccDscaff6	8886609	0.436199
S6_8886720	VaccDscaff6	8886720	0.436199
S6_12956452	VaccDscaff6	12956452	0.436199
S6_12956454	VaccDscaff6	12956454	0.436199
S6_14050669	VaccDscaff6	14050669	0.436199
S6_25711858	VaccDscaff6	25711858	0.436199
S6_32505366	VaccDscaff6	32505366	0.436199
S6_35118723	VaccDscaff6	35118723	0.436199
S7_6358594	VaccDscaff7	6358594	0.436199
S7_6970941	VaccDscaff7	6970941	0.436199
S7_28820723	VaccDscaff7	28820723	0.436199
S11_23375156	VaccDscaff11	23375156	0.436199
S12_30940672	VaccDscaff12	30940672	0.436199
S17_35259014	VaccDscaff17	35259014	0.436199
S20_6284216	VaccDscaff20	6284216	0.436199
S20_18563416	VaccDscaff20	18563416	0.436199
S20_19073913	VaccDscaff20	19073913	0.436199
S20_19818824	VaccDscaff20	19818824	0.436199
S20_19831605	VaccDscaff20	19831605	0.436199
S20_33387167	VaccDscaff20	33387167	0.436199
S20_33746151	VaccDscaff20	33746151	0.436199
S7_8859073	VaccDscaff7	8859073	0.435437
S11_34377658	VaccDscaff11	34377658	0.435394
S4_42525424	VaccDscaff4	42525424	0.435378
S7_41147705	VaccDscaff7	41147705	0.435378
S1_24866661	VaccDscaff1	24866661	0.435357
S1_27834770	VaccDscaff1	27834770	0.435357
S2_23346954	VaccDscaff2	23346954	0.435357
S2_27325982	VaccDscaff2	27325982	0.435357
S6_27046334	VaccDscaff6	27046334	0.435357
S6_27046395	VaccDscaff6	27046395	0.435357
S6_27106392	VaccDscaff6	27106392	0.435357
S6_27106439	VaccDscaff6	27106439	0.435357
S12_35796621	VaccDscaff12	35796621	0.435357
S13_19451113	VaccDscaff13	19451113	0.435357
S21_33740289	VaccDscaff21	33740289	0.433972
S21_33740293	VaccDscaff21	33740293	0.433972
S6_13717095	VaccDscaff6	13717095	0.433504
S21_24881911	VaccDscaff21	24881911	0.433448
S11_27622803	VaccDscaff11	27622803	0.433355
S1_25712433	VaccDscaff1	25712433	0.432752
S1_27963226	VaccDscaff1	27963226	0.432752
S4_4055671	VaccDscaff4	4055671	0.432752
S7_25272364	VaccDscaff7	25272364	0.432752
S7_40301217	VaccDscaff7	40301217	0.432752
S12_12631702	VaccDscaff12	12631702	0.432752
S12_36596471	VaccDscaff12	36596471	0.432752
S12_37263769	VaccDscaff12	37263769	0.432752
S12_37263782	VaccDscaff12	37263782	0.432752
S12_37263803	VaccDscaff12	37263803	0.432752
S17_4891428	VaccDscaff17	4891428	0.432752
S20_17489075	VaccDscaff20	17489075	0.432752
S21_36909397	VaccDscaff21	36909397	0.432752
S21_36909410	VaccDscaff21	36909410	0.432752
S21_30581709	VaccDscaff21	30581709	0.432294
S7_8847882	VaccDscaff7	8847882	0.431983
S1_16703116	VaccDscaff1	16703116	0.431885
S1_19573535	VaccDscaff1	19573535	0.431885
S1_33446452	VaccDscaff1	33446452	0.431885
S1_45906534	VaccDscaff1	45906534	0.431885
S2_24328207	VaccDscaff2	24328207	0.431885
S2_27961441	VaccDscaff2	27961441	0.431885
S2_35469852	VaccDscaff2	35469852	0.431885
S6_20245398	VaccDscaff6	20245398	0.431885
S6_21361411	VaccDscaff6	21361411	0.431885
S6_33663382	VaccDscaff6	33663382	0.431885
S7_8865936	VaccDscaff7	8865936	0.431885
S12_35287334	VaccDscaff12	35287334	0.431885
S13_23263607	VaccDscaff13	23263607	0.431885
S17_37893228	VaccDscaff17	37893228	0.431885
S20_22088241	VaccDscaff20	22088241	0.431885
S20_22088244	VaccDscaff20	22088244	0.431885
S20_29053406	VaccDscaff20	29053406	0.431885
S22_579628	VaccDscaff22	579628	0.431885
S22_2205269	VaccDscaff22	2205269	0.431885
S22_2205277	VaccDscaff22	2205277	0.431885
S22_14025132	VaccDscaff22	14025132	0.431885
S13_15951242	VaccDscaff13	15951242	0.431676
S1_28978265	VaccDscaff1	28978265	0.431325
S1_16737479	VaccDscaff1	16737479	0.43113
S20_11781653	VaccDscaff20	11781653	0.43113
S4_5754562	VaccDscaff4	5754562	0.430622
S6_32566099	VaccDscaff6	32566099	0.429526
S13_29669851	VaccDscaff13	29669851	0.429526
S1_18550434	VaccDscaff1	18550434	0.429392
S1_20910673	VaccDscaff1	20910673	0.428541
S1_21675064	VaccDscaff1	21675064	0.428541
S1_23662192	VaccDscaff1	23662192	0.428541
S2_32224859	VaccDscaff2	32224859	0.428541
S6_24585048	VaccDscaff6	24585048	0.428541
S13_22255949	VaccDscaff13	22255949	0.428541
S13_24290412	VaccDscaff13	24290412	0.428541
S13_27808127	VaccDscaff13	27808127	0.428541
S17_31984476	VaccDscaff17	31984476	0.4283
S2_15276996	VaccDscaff2	15276996	0.428029
S2_28964235	VaccDscaff2	28964235	0.428029
S2_40390359	VaccDscaff2	40390359	0.428029
S7_25153499	VaccDscaff7	25153499	0.428029
S11_22200713	VaccDscaff11	22200713	0.428029
S12_39282684	VaccDscaff12	39282684	0.428029
S1_15190192	VaccDscaff1	15190192	0.427496
S2_8740479	VaccDscaff2	8740479	0.427496
S2_8740483	VaccDscaff2	8740483	0.427496
S2_15457121	VaccDscaff2	15457121	0.427496
S2_30757439	VaccDscaff2	30757439	0.427496
S2_33816746	VaccDscaff2	33816746	0.427496
S2_35961999	VaccDscaff2	35961999	0.427496
S4_10618170	VaccDscaff4	10618170	0.427496
S4_10618236	VaccDscaff4	10618236	0.427496
S4_38403566	VaccDscaff4	38403566	0.427496
S6_1873329	VaccDscaff6	1873329	0.427496
S6_1873330	VaccDscaff6	1873330	0.427496
S6_14050814	VaccDscaff6	14050814	0.427496
S6_19704273	VaccDscaff6	19704273	0.427496
S6_19704277	VaccDscaff6	19704277	0.427496
S6_24691291	VaccDscaff6	24691291	0.427496
S7_2459927	VaccDscaff7	2459927	0.427496
S7_6956728	VaccDscaff7	6956728	0.427496
S11_19686730	VaccDscaff11	19686730	0.427496
S11_23382617	VaccDscaff11	23382617	0.427496
S11_23382651	VaccDscaff11	23382651	0.427496
S12_9443675	VaccDscaff12	9443675	0.427496
S12_13658692	VaccDscaff12	13658692	0.427496
S12_13658786	VaccDscaff12	13658786	0.427496
S13_20037156	VaccDscaff13	20037156	0.427496
S17_14464494	VaccDscaff17	14464494	0.427496
S20_2317529	VaccDscaff20	2317529	0.427496
S20_9637608	VaccDscaff20	9637608	0.427496
S20_10176179	VaccDscaff20	10176179	0.427496
S20_10176211	VaccDscaff20	10176211	0.427496
S20_14999957	VaccDscaff20	14999957	0.427496
S20_17613155	VaccDscaff20	17613155	0.427496
S20_18645284	VaccDscaff20	18645284	0.427496
S20_25149172	VaccDscaff20	25149172	0.427496
S20_30508815	VaccDscaff20	30508815	0.427496
S21_34069746	VaccDscaff21	34069746	0.427496
S22_442018	VaccDscaff22	442018	0.427496
S22_1112253	VaccDscaff22	1112253	0.427496
S1_19573664	VaccDscaff1	19573664	0.427417
S2_18569832	VaccDscaff2	18569832	0.427417
S2_23786381	VaccDscaff2	23786381	0.427417
S2_26831059	VaccDscaff2	26831059	0.427417
S2_34864662	VaccDscaff2	34864662	0.427417
S4_16056065	VaccDscaff4	16056065	0.427417
S6_7863917	VaccDscaff6	7863917	0.427417
S6_12815271	VaccDscaff6	12815271	0.427417
S6_20252593	VaccDscaff6	20252593	0.427417
S6_26407518	VaccDscaff6	26407518	0.427417
S6_26805303	VaccDscaff6	26805303	0.427417
S6_28153740	VaccDscaff6	28153740	0.427417
S7_9273793	VaccDscaff7	9273793	0.427417
S11_25124003	VaccDscaff11	25124003	0.427417
S12_12784133	VaccDscaff12	12784133	0.427417
S13_14347229	VaccDscaff13	14347229	0.427417
S13_19706890	VaccDscaff13	19706890	0.427417
S13_20125311	VaccDscaff13	20125311	0.427417
S17_38226340	VaccDscaff17	38226340	0.427417
S17_38738407	VaccDscaff17	38738407	0.427417
S13_26280478	VaccDscaff13	26280478	0.426812
S7_20536861	VaccDscaff7	20536861	0.426791
S2_24620285	VaccDscaff2	24620285	0.426575
S2_37271463	VaccDscaff2	37271463	0.426575
S12_38151475	VaccDscaff12	38151475	0.426575
S13_34514227	VaccDscaff13	34514227	0.426575
S21_27292948	VaccDscaff21	27292948	0.426575
S22_9948668	VaccDscaff22	9948668	0.426575
S22_9948712	VaccDscaff22	9948712	0.426575
S13_28607739	VaccDscaff13	28607739	0.426163
S2_25237611	VaccDscaff2	25237611	0.42593
S22_14389334	VaccDscaff22	14389334	0.42593
S1_33724846	VaccDscaff1	33724846	0.425648
S6_23243916	VaccDscaff6	23243916	0.425506
S6_24068310	VaccDscaff6	24068310	0.425506
S6_27091381	VaccDscaff6	27091381	0.425506
S6_27091384	VaccDscaff6	27091384	0.425506
S7_41271251	VaccDscaff7	41271251	0.425506
S13_19744334	VaccDscaff13	19744334	0.425506
S13_22979647	VaccDscaff13	22979647	0.425506
S13_22979740	VaccDscaff13	22979740	0.425506
S13_28186821	VaccDscaff13	28186821	0.425506
S13_39390544	VaccDscaff13	39390544	0.425506
S20_12925572	VaccDscaff20	12925572	0.425506
S22_446321	VaccDscaff22	446321	0.425506
S1_19562764	VaccDscaff1	19562764	0.424867
S1_24927106	VaccDscaff1	24927106	0.424867
S2_24094895	VaccDscaff2	24094895	0.424867
S2_30030675	VaccDscaff2	30030675	0.422944
S4_3934180	VaccDscaff4	3934180	0.422944
S6_25680593	VaccDscaff6	25680593	0.422944
S6_27815946	VaccDscaff6	27815946	0.422944
S17_35496253	VaccDscaff17	35496253	0.422944
S22_750471	VaccDscaff22	750471	0.422944
S1_11297696	VaccDscaff1	11297696	0.42286
S4_1623161	VaccDscaff4	1623161	0.422644
S1_21227321	VaccDscaff1	21227321	0.422514
S1_28451198	VaccDscaff1	28451198	0.422514
S1_28451202	VaccDscaff1	28451202	0.422514
S1_28451206	VaccDscaff1	28451206	0.422514
S1_28621576	VaccDscaff1	28621576	0.422514
S1_33446482	VaccDscaff1	33446482	0.422514
S6_22399903	VaccDscaff6	22399903	0.422514
S21_28787218	VaccDscaff21	28787218	0.422514
S21_37549092	VaccDscaff21	37549092	0.422514
S22_577755	VaccDscaff22	577755	0.422514
S2_10084737	VaccDscaff2	10084737	0.422235
S7_41138893	VaccDscaff7	41138893	0.422235
S2_43788623	VaccDscaff2	43788623	0.422235
S2_44515469	VaccDscaff2	44515469	0.422235
S11_29146071	VaccDscaff11	29146071	0.422235
S21_22025779	VaccDscaff21	22025779	0.422079
S22_10227512	VaccDscaff22	10227512	0.422079
S1_21879939	VaccDscaff1	21879939	0.421483
S7_21150219	VaccDscaff7	21150219	0.421115
S1_30501568	VaccDscaff1	30501568	0.420763
S2_33803300	VaccDscaff2	33803300	0.420763
S7_6750370	VaccDscaff7	6750370	0.420763
S20_4622839	VaccDscaff20	4622839	0.420763
S20_33477895	VaccDscaff20	33477895	0.420395
S2_2781865	VaccDscaff2	2781865	0.420395
S6_34141072	VaccDscaff6	34141072	0.420137
S6_3582274	VaccDscaff6	3582274	0.420023
S6_27614824	VaccDscaff6	27614824	0.420023
S7_22031254	VaccDscaff7	22031254	0.420023
S7_22031259	VaccDscaff7	22031259	0.420023
S12_35809695	VaccDscaff12	35809695	0.420023
S1_3110713	VaccDscaff1	3110713	0.419558
S1_29262201	VaccDscaff1	29262201	0.419558
S2_13823449	VaccDscaff2	13823449	0.419558
S2_20288723	VaccDscaff2	20288723	0.419558
S2_20288724	VaccDscaff2	20288724	0.419558
S2_25012979	VaccDscaff2	25012979	0.419558
S2_26331225	VaccDscaff2	26331225	0.419558
S6_10117052	VaccDscaff6	10117052	0.419558
S6_11117507	VaccDscaff6	11117507	0.419558
S7_8926052	VaccDscaff7	8926052	0.419558
S7_9235864	VaccDscaff7	9235864	0.419558
S7_22629519	VaccDscaff7	22629519	0.419558
S12_36420165	VaccDscaff12	36420165	0.419558
S13_39174012	VaccDscaff13	39174012	0.419558
S13_39174059	VaccDscaff13	39174059	0.419558
S20_6284261	VaccDscaff20	6284261	0.419558
S22_9947907	VaccDscaff22	9947907	0.419558
S22_9947929	VaccDscaff22	9947929	0.419558
S22_9951658	VaccDscaff22	9951658	0.419558
S1_13500466	VaccDscaff1	13500466	0.41942
S1_23944448	VaccDscaff1	23944448	0.41942
S2_35268986	VaccDscaff2	35268986	0.41942
S1_29023681	VaccDscaff1	29023681	0.418474
S2_8823660	VaccDscaff2	8823660	0.418474
S2_30757436	VaccDscaff2	30757436	0.418474
S6_27414459	VaccDscaff6	27414459	0.418474
S7_41208331	VaccDscaff7	41208331	0.418474
S13_30240326	VaccDscaff13	30240326	0.418474
S20_14226801	VaccDscaff20	14226801	0.418474
S20_19073075	VaccDscaff20	19073075	0.418474
S20_21380167	VaccDscaff20	21380167	0.418474
S7_38889442	VaccDscaff7	38889442	0.418471
S1_18240114	VaccDscaff1	18240114	0.417869
S1_23121674	VaccDscaff1	23121674	0.417869
S1_25311497	VaccDscaff1	25311497	0.417869
S1_29027676	VaccDscaff1	29027676	0.417869
S1_29027802	VaccDscaff1	29027802	0.417869
S1_45258466	VaccDscaff1	45258466	0.417869
S2_8311550	VaccDscaff2	8311550	0.417869
S2_24587190	VaccDscaff2	24587190	0.417869
S2_32046120	VaccDscaff2	32046120	0.417869
S4_35746793	VaccDscaff4	35746793	0.417869
S6_11972960	VaccDscaff6	11972960	0.417869
S6_25797425	VaccDscaff6	25797425	0.417869
S6_28175916	VaccDscaff6	28175916	0.417869
S7_18814198	VaccDscaff7	18814198	0.417869
S7_26883202	VaccDscaff7	26883202	0.417869
S7_26883205	VaccDscaff7	26883205	0.417869
S13_1697402	VaccDscaff13	1697402	0.417869
S13_20035314	VaccDscaff13	20035314	0.417869
S13_20837788	VaccDscaff13	20837788	0.417869
S13_30278315	VaccDscaff13	30278315	0.417869
S13_31635673	VaccDscaff13	31635673	0.417869
S13_37143398	VaccDscaff13	37143398	0.417869
S20_12936407	VaccDscaff20	12936407	0.417869
S20_23916474	VaccDscaff20	23916474	0.417869
S20_25147362	VaccDscaff20	25147362	0.417869
S20_30506476	VaccDscaff20	30506476	0.417869
S21_28705444	VaccDscaff21	28705444	0.417869
S21_32276103	VaccDscaff21	32276103	0.417869
S1_21410116	VaccDscaff1	21410116	0.417643
S11_23418329	VaccDscaff11	23418329	0.417643
S13_15860738	VaccDscaff13	15860738	0.417643
S13_15860750	VaccDscaff13	15860750	0.417643
S13_21923511	VaccDscaff13	21923511	0.417643
S22_4840306	VaccDscaff22	4840306	0.417643
S4_5758239	VaccDscaff4	5758239	0.417456
S1_19692088	VaccDscaff1	19692088	0.417438
S22_10194896	VaccDscaff22	10194896	0.417295
S22_441773	VaccDscaff22	441773	0.416843
S11_20174193	VaccDscaff11	20174193	0.416708
S17_35300662	VaccDscaff17	35300662	0.415945
S7_33004766	VaccDscaff7	33004766	0.415588
S7_33004770	VaccDscaff7	33004770	0.415588
S7_33004772	VaccDscaff7	33004772	0.415588
S20_26874794	VaccDscaff20	26874794	0.415588
S22_3345354	VaccDscaff22	3345354	0.415588
S1_23111256	VaccDscaff1	23111256	0.415234
S1_34561314	VaccDscaff1	34561314	0.415234
S2_35186219	VaccDscaff2	35186219	0.415234
S2_37456734	VaccDscaff2	37456734	0.415234
S6_25829459	VaccDscaff6	25829459	0.415234
S6_27099410	VaccDscaff6	27099410	0.415234
S7_5732871	VaccDscaff7	5732871	0.415234
S7_7225321	VaccDscaff7	7225321	0.415234
S7_41206513	VaccDscaff7	41206513	0.415234
S7_41213944	VaccDscaff7	41213944	0.415234
S12_39200849	VaccDscaff12	39200849	0.415234
S13_26280403	VaccDscaff13	26280403	0.415234
S20_14011649	VaccDscaff20	14011649	0.415234
S21_36567245	VaccDscaff21	36567245	0.415234
S22_13482909	VaccDscaff22	13482909	0.415234
S1_25308536	VaccDscaff1	25308536	0.41381
S20_25055436	VaccDscaff20	25055436	0.41381
S20_30508578	VaccDscaff20	30508578	0.41381
S22_507968	VaccDscaff22	507968	0.41381
S22_35217840	VaccDscaff22	35217840	0.41381
S2_16541053	VaccDscaff2	16541053	0.41346
S11_22567569	VaccDscaff11	22567569	0.41346
S11_39770994	VaccDscaff11	39770994	0.41346
S17_18135991	VaccDscaff17	18135991	0.41346
S17_20087338	VaccDscaff17	20087338	0.41346
S20_1399530	VaccDscaff20	1399530	0.41346
S21_21978535	VaccDscaff21	21978535	0.41346
S1_18136257	VaccDscaff1	18136257	0.413219
S1_18136260	VaccDscaff1	18136260	0.413219
S1_18136278	VaccDscaff1	18136278	0.413219
S1_18136284	VaccDscaff1	18136284	0.413219
S1_25566734	VaccDscaff1	25566734	0.413219
S7_24522148	VaccDscaff7	24522148	0.413219
S12_12377391	VaccDscaff12	12377391	0.413219
S17_38488904	VaccDscaff17	38488904	0.413219
S20_16648449	VaccDscaff20	16648449	0.413219
S21_27349333	VaccDscaff21	27349333	0.413219
S7_34869365	VaccDscaff7	34869365	0.413006
S11_28503191	VaccDscaff11	28503191	0.413006
S12_786499	VaccDscaff12	786499	0.413006
S22_8046987	VaccDscaff22	8046987	0.413006
S1_16415740	VaccDscaff1	16415740	0.412786
S1_25218140	VaccDscaff1	25218140	0.412786
S2_18763191	VaccDscaff2	18763191	0.412786
S2_29332310	VaccDscaff2	29332310	0.412786
S2_43574024	VaccDscaff2	43574024	0.412786
S6_8724353	VaccDscaff6	8724353	0.412786
S6_11541812	VaccDscaff6	11541812	0.412786
S7_6509679	VaccDscaff7	6509679	0.412786
S7_14308320	VaccDscaff7	14308320	0.412786
S7_16775377	VaccDscaff7	16775377	0.412786
S7_37748168	VaccDscaff7	37748168	0.412786
S17_32291897	VaccDscaff17	32291897	0.412786
S17_34590790	VaccDscaff17	34590790	0.412786
S20_2096894	VaccDscaff20	2096894	0.412786
S20_2096901	VaccDscaff20	2096901	0.412786
S20_2096927	VaccDscaff20	2096927	0.412786
S20_9453526	VaccDscaff20	9453526	0.412786
S20_11840200	VaccDscaff20	11840200	0.412786
S20_14369092	VaccDscaff20	14369092	0.412786
S20_14369185	VaccDscaff20	14369185	0.412786
S20_28213846	VaccDscaff20	28213846	0.412786
S21_32023554	VaccDscaff21	32023554	0.412786
S21_32023561	VaccDscaff21	32023561	0.412786
S22_10062232	VaccDscaff22	10062232	0.412786
S2_14307054	VaccDscaff2	14307054	0.412786
S2_15411819	VaccDscaff2	15411819	0.412786
S2_17443392	VaccDscaff2	17443392	0.412786
S2_19380722	VaccDscaff2	19380722	0.412786
S7_17110410	VaccDscaff7	17110410	0.412786
S17_25157111	VaccDscaff17	25157111	0.412786
S22_8334564	VaccDscaff22	8334564	0.412786
S2_25022538	VaccDscaff2	25022538	0.412764
S2_32228052	VaccDscaff2	32228052	0.412764
S22_1049087	VaccDscaff22	1049087	0.412724
S1_40695392	VaccDscaff1	40695392	0.41266
S1_42046779	VaccDscaff1	42046779	0.41236
S1_42046805	VaccDscaff1	42046805	0.41236
S2_9048924	VaccDscaff2	9048924	0.41236
S2_31009669	VaccDscaff2	31009669	0.41236
S6_34229925	VaccDscaff6	34229925	0.41236
S6_34229979	VaccDscaff6	34229979	0.41236
S7_27930215	VaccDscaff7	27930215	0.41236
S7_35370377	VaccDscaff7	35370377	0.41236
S7_41003273	VaccDscaff7	41003273	0.41236
S11_38121555	VaccDscaff11	38121555	0.41236
S12_8237028	VaccDscaff12	8237028	0.41236
S12_37938374	VaccDscaff12	37938374	0.41236
S12_38577832	VaccDscaff12	38577832	0.41236
S17_8840706	VaccDscaff17	8840706	0.41236
S20_6228304	VaccDscaff20	6228304	0.41236
S20_14227086	VaccDscaff20	14227086	0.41236
S20_30518260	VaccDscaff20	30518260	0.41236
S21_35470871	VaccDscaff21	35470871	0.41236
S22_777791	VaccDscaff22	777791	0.41236
S22_777917	VaccDscaff22	777917	0.41236
S1_24629134	VaccDscaff1	24629134	0.411044
S1_25832093	VaccDscaff1	25832093	0.411044
S6_19704321	VaccDscaff6	19704321	0.411044
S6_19704467	VaccDscaff6	19704467	0.411044
S7_14434220	VaccDscaff7	14434220	0.411044
S7_23013250	VaccDscaff7	23013250	0.411044
S22_14616912	VaccDscaff22	14616912	0.408565
S11_34377612	VaccDscaff11	34377612	0.408565
S6_12514816	VaccDscaff6	12514816	0.408516
S7_31589655	VaccDscaff7	31589655	0.40835
S12_35924103	VaccDscaff12	35924103	0.407954
S21_24480081	VaccDscaff21	24480081	0.407954
S1_28486271	VaccDscaff1	28486271	0.407929
S7_6063542	VaccDscaff7	6063542	0.407929
S7_6727061	VaccDscaff7	6727061	0.407929
S7_21933719	VaccDscaff7	21933719	0.407929
S13_20033107	VaccDscaff13	20033107	0.407929
S13_20033108	VaccDscaff13	20033108	0.407929
S20_21321782	VaccDscaff20	21321782	0.407929
S20_21321793	VaccDscaff20	21321793	0.407929
S20_23924307	VaccDscaff20	23924307	0.407929
S13_5369073	VaccDscaff13	5369073	0.407534
S4_40969860	VaccDscaff4	40969860	0.407286
S2_27246099	VaccDscaff2	27246099	0.406851
S20_9620869	VaccDscaff20	9620869	0.406851
S13_23808704	VaccDscaff13	23808704	0.406226
S13_23808728	VaccDscaff13	23808728	0.406226
S13_29665470	VaccDscaff13	29665470	0.406226
S21_37225869	VaccDscaff21	37225869	0.406226
S2_5878076	VaccDscaff2	5878076	0.406003
S2_17479799	VaccDscaff2	17479799	0.406003
S2_19799430	VaccDscaff2	19799430	0.406003
S2_19937058	VaccDscaff2	19937058	0.406003
S2_19937059	VaccDscaff2	19937059	0.406003
S4_10718828	VaccDscaff4	10718828	0.406003
S4_40853932	VaccDscaff4	40853932	0.406003
S4_40853946	VaccDscaff4	40853946	0.406003
S6_10799980	VaccDscaff6	10799980	0.406003
S6_12192233	VaccDscaff6	12192233	0.406003
S6_12328799	VaccDscaff6	12328799	0.406003
S7_24963849	VaccDscaff7	24963849	0.406003
S7_31645540	VaccDscaff7	31645540	0.406003
S7_35694511	VaccDscaff7	35694511	0.406003
S11_20178574	VaccDscaff11	20178574	0.406003
S11_22904196	VaccDscaff11	22904196	0.406003
S11_31968206	VaccDscaff11	31968206	0.406003
S11_37501545	VaccDscaff11	37501545	0.406003
S11_39394261	VaccDscaff11	39394261	0.406003
S11_39394290	VaccDscaff11	39394290	0.406003
S12_17042924	VaccDscaff12	17042924	0.406003
S17_16007426	VaccDscaff17	16007426	0.406003
S17_20635429	VaccDscaff17	20635429	0.406003
S17_20683276	VaccDscaff17	20683276	0.406003
S17_20694689	VaccDscaff17	20694689	0.406003
S17_22386555	VaccDscaff17	22386555	0.406003
S17_25139081	VaccDscaff17	25139081	0.406003
S17_28577238	VaccDscaff17	28577238	0.406003
S17_31040952	VaccDscaff17	31040952	0.406003
S17_31628380	VaccDscaff17	31628380	0.406003
S17_38671207	VaccDscaff17	38671207	0.406003
S20_1067725	VaccDscaff20	1067725	0.406003
S20_1988140	VaccDscaff20	1988140	0.406003
S20_3589645	VaccDscaff20	3589645	0.406003
S20_13163626	VaccDscaff20	13163626	0.406003
S20_23206614	VaccDscaff20	23206614	0.406003
S20_34079137	VaccDscaff20	34079137	0.406003
S20_37294638	VaccDscaff20	37294638	0.406003
S21_21297286	VaccDscaff21	21297286	0.406003
S21_24470333	VaccDscaff21	24470333	0.406003
S22_7654723	VaccDscaff22	7654723	0.406003
S22_7654739	VaccDscaff22	7654739	0.406003
S22_7654747	VaccDscaff22	7654747	0.406003
S22_7732931	VaccDscaff22	7732931	0.406003
S22_13747930	VaccDscaff22	13747930	0.406003
S22_31374048	VaccDscaff22	31374048	0.406003
S2_9839043	VaccDscaff2	9839043	0.405353
S2_15501578	VaccDscaff2	15501578	0.405353
S2_17057556	VaccDscaff2	17057556	0.405353
S2_17498633	VaccDscaff2	17498633	0.405353
S2_18239734	VaccDscaff2	18239734	0.405353
S2_18768773	VaccDscaff2	18768773	0.405353
S2_32712457	VaccDscaff2	32712457	0.405353
S2_34980593	VaccDscaff2	34980593	0.405353
S4_13612620	VaccDscaff4	13612620	0.405353
S6_9589521	VaccDscaff6	9589521	0.405353
S6_10197322	VaccDscaff6	10197322	0.405353
S6_15729327	VaccDscaff6	15729327	0.405353
S13_21864894	VaccDscaff13	21864894	0.405353
S13_27833048	VaccDscaff13	27833048	0.405353
S13_27833050	VaccDscaff13	27833050	0.405353
S13_37742616	VaccDscaff13	37742616	0.405353
S20_12515679	VaccDscaff20	12515679	0.405353
S20_22003644	VaccDscaff20	22003644	0.405353
S21_29112994	VaccDscaff21	29112994	0.405353
S21_34361193	VaccDscaff21	34361193	0.405353
S22_1034890	VaccDscaff22	1034890	0.405353
S22_10355448	VaccDscaff22	10355448	0.405353
S22_10355505	VaccDscaff22	10355505	0.405353
S22_13767048	VaccDscaff22	13767048	0.405353
S22_14427380	VaccDscaff22	14427380	0.405353
S22_14427411	VaccDscaff22	14427411	0.405353
S2_12779959	VaccDscaff2	12779959	0.404972
S2_23173408	VaccDscaff2	23173408	0.404972
S7_9079724	VaccDscaff7	9079724	0.404972
S1_20375360	VaccDscaff1	20375360	0.404504
S1_21374977	VaccDscaff1	21374977	0.404504
S13_16001610	VaccDscaff13	16001610	0.404504
S22_13480420	VaccDscaff22	13480420	0.404504
S1_11421366	VaccDscaff1	11421366	0.403605
S13_15455466	VaccDscaff13	15455466	0.403306
S13_22167802	VaccDscaff13	22167802	0.403089
S2_39686289	VaccDscaff2	39686289	0.403089
S13_2022083	VaccDscaff13	2022083	0.403089
S13_2022084	VaccDscaff13	2022084	0.403089
S13_18665384	VaccDscaff13	18665384	0.403089
S2_25012225	VaccDscaff2	25012225	0.400247
S2_25012473	VaccDscaff2	25012473	0.400247
S2_34934765	VaccDscaff2	34934765	0.400247
S2_38026692	VaccDscaff2	38026692	0.400247
S2_40390532	VaccDscaff2	40390532	0.400247
S4_21827041	VaccDscaff4	21827041	0.400247
S4_21827068	VaccDscaff4	21827068	0.400247
S4_21827163	VaccDscaff4	21827163	0.400247
S7_14422622	VaccDscaff7	14422622	0.400247
S7_19059133	VaccDscaff7	19059133	0.400247
S7_32069037	VaccDscaff7	32069037	0.400247
S7_32069041	VaccDscaff7	32069041	0.400247
S13_19864632	VaccDscaff13	19864632	0.400247
S17_3485279	VaccDscaff17	3485279	0.400247
S17_25494848	VaccDscaff17	25494848	0.400247
S17_35822660	VaccDscaff17	35822660	0.400247
S22_31635976	VaccDscaff22	31635976	0.400247
S7_29464859	VaccDscaff7	29464859	0.400134
S12_35286986	VaccDscaff12	35286986	0.400134
S7_33699221	VaccDscaff7	33699221	0.399946
S17_19551277	VaccDscaff17	19551277	0.399946
S4_10267253	VaccDscaff4	10267253	0.399495
S6_9253867	VaccDscaff6	9253867	0.399495
S6_26646738	VaccDscaff6	26646738	0.399495
S7_31001546	VaccDscaff7	31001546	0.399495
S13_33658093	VaccDscaff13	33658093	0.399495
S17_20087350	VaccDscaff17	20087350	0.399495
S20_25023777	VaccDscaff20	25023777	0.399495
S20_30500789	VaccDscaff20	30500789	0.399495
S2_15952237	VaccDscaff2	15952237	0.398336
S2_16549416	VaccDscaff2	16549416	0.398336
S2_18813539	VaccDscaff2	18813539	0.398336
S4_3862066	VaccDscaff4	3862066	0.398336
S4_35936186	VaccDscaff4	35936186	0.398336
S7_33253290	VaccDscaff7	33253290	0.398336
S7_36374909	VaccDscaff7	36374909	0.398336
S11_38758620	VaccDscaff11	38758620	0.398336
S11_38758718	VaccDscaff11	38758718	0.398336
S12_12763972	VaccDscaff12	12763972	0.398336
S12_12764021	VaccDscaff12	12764021	0.398336
S12_17122685	VaccDscaff12	17122685	0.398336
S12_19086691	VaccDscaff12	19086691	0.398336
S17_13518956	VaccDscaff17	13518956	0.398336
S17_17566864	VaccDscaff17	17566864	0.398336
S17_20037066	VaccDscaff17	20037066	0.398336
S17_24284320	VaccDscaff17	24284320	0.398336
S17_25645002	VaccDscaff17	25645002	0.398336
S17_26613576	VaccDscaff17	26613576	0.398336
S17_35331798	VaccDscaff17	35331798	0.398336
S17_37419618	VaccDscaff17	37419618	0.398336
S17_37419619	VaccDscaff17	37419619	0.398336
S20_1093312	VaccDscaff20	1093312	0.398336
S20_19037147	VaccDscaff20	19037147	0.398336
S21_17312591	VaccDscaff21	17312591	0.398336
S21_17312862	VaccDscaff21	17312862	0.398336
S22_31374006	VaccDscaff22	31374006	0.398336
S22_32805194	VaccDscaff22	32805194	0.398336
S1_26754343	VaccDscaff1	26754343	0.398211
S11_8725029	VaccDscaff11	8725029	0.398211
S21_32612098	VaccDscaff21	32612098	0.398151
S2_16619743	VaccDscaff2	16619743	0.397715
S6_4104962	VaccDscaff6	4104962	0.397715
S7_2665072	VaccDscaff7	2665072	0.397715
S20_6676410	VaccDscaff20	6676410	0.397715
S1_10845504	VaccDscaff1	10845504	0.396963
S1_10845534	VaccDscaff1	10845534	0.396963
S1_10845540	VaccDscaff1	10845540	0.396963
S1_17066485	VaccDscaff1	17066485	0.396963
S4_8526184	VaccDscaff4	8526184	0.396963
S4_8526375	VaccDscaff4	8526375	0.396963
S4_29790596	VaccDscaff4	29790596	0.396963
S7_20375507	VaccDscaff7	20375507	0.396963
S13_5568952	VaccDscaff13	5568952	0.396963
S20_30326130	VaccDscaff20	30326130	0.396963
S20_30821945	VaccDscaff20	30821945	0.396963
S21_37249695	VaccDscaff21	37249695	0.396963
S22_2198185	VaccDscaff22	2198185	0.396963
S22_13142046	VaccDscaff22	13142046	0.396963
S13_31979150	VaccDscaff13	31979150	0.396197
S21_37397008	VaccDscaff21	37397008	0.396197
S17_32838010	VaccDscaff17	32838010	0.395761
S7_40168064	VaccDscaff7	40168064	0.395357
S2_24366572	VaccDscaff2	24366572	0.395124
S2_24366573	VaccDscaff2	24366573	0.395124
S11_35686500	VaccDscaff11	35686500	0.393981
S12_19336700	VaccDscaff12	19336700	0.393981
S12_22728759	VaccDscaff12	22728759	0.393981
S13_20262095	VaccDscaff13	20262095	0.393981
S20_31278375	VaccDscaff20	31278375	0.393981
S22_29171057	VaccDscaff22	29171057	0.393981
S7_39765636	VaccDscaff7	39765636	0.393653
S1_17861686	VaccDscaff1	17861686	0.39323
S2_40288429	VaccDscaff2	40288429	0.39196
S6_12791603	VaccDscaff6	12791603	0.39196
S20_31303946	VaccDscaff20	31303946	0.39196
S2_33891410	VaccDscaff2	33891410	0.391788
S7_6587059	VaccDscaff7	6587059	0.391309
S7_6587060	VaccDscaff7	6587060	0.391309
S11_38428306	VaccDscaff11	38428306	0.391309
S17_5185545	VaccDscaff17	5185545	0.391309
S1_32702967	VaccDscaff1	32702967	0.391265
S2_43976037	VaccDscaff2	43976037	0.391265
S6_4316341	VaccDscaff6	4316341	0.391265
S6_4316349	VaccDscaff6	4316349	0.391265
S6_9634724	VaccDscaff6	9634724	0.391265
S6_14207531	VaccDscaff6	14207531	0.391265
S6_14700039	VaccDscaff6	14700039	0.391265
S6_27723239	VaccDscaff6	27723239	0.391265
S6_33434259	VaccDscaff6	33434259	0.391265
S6_35118759	VaccDscaff6	35118759	0.391265
S7_6452563	VaccDscaff7	6452563	0.391265
S7_24307486	VaccDscaff7	24307486	0.391265
S7_28456742	VaccDscaff7	28456742	0.391265
S7_37190951	VaccDscaff7	37190951	0.391265
S7_37193552	VaccDscaff7	37193552	0.391265
S11_397523	VaccDscaff11	397523	0.391265
S12_9399624	VaccDscaff12	9399624	0.391265
S12_34748123	VaccDscaff12	34748123	0.391265
S13_38861494	VaccDscaff13	38861494	0.391265
S20_6672776	VaccDscaff20	6672776	0.391265
S20_6692696	VaccDscaff20	6692696	0.391265
S20_14579661	VaccDscaff20	14579661	0.391265
S21_37249603	VaccDscaff21	37249603	0.391265
S22_11083352	VaccDscaff22	11083352	0.391265
S22_12690909	VaccDscaff22	12690909	0.391265
S1_14844373	VaccDscaff1	14844373	0.391265
S1_14844375	VaccDscaff1	14844375	0.391265
S1_15296333	VaccDscaff1	15296333	0.391265
S2_7405561	VaccDscaff2	7405561	0.391265
S2_30904605	VaccDscaff2	30904605	0.391265
S2_31669649	VaccDscaff2	31669649	0.391265
S2_35361019	VaccDscaff2	35361019	0.391265
S2_44337129	VaccDscaff2	44337129	0.391265
S4_37301737	VaccDscaff4	37301737	0.391265
S6_34171048	VaccDscaff6	34171048	0.391265
S6_34171060	VaccDscaff6	34171060	0.391265
S7_8847982	VaccDscaff7	8847982	0.391265
S7_22785625	VaccDscaff7	22785625	0.391265
S12_11447003	VaccDscaff12	11447003	0.391265
S13_21812951	VaccDscaff13	21812951	0.391265
S20_6692681	VaccDscaff20	6692681	0.391265
S1_40695394	VaccDscaff1	40695394	0.391213
S17_37265209	VaccDscaff17	37265209	0.39058
S22_12982462	VaccDscaff22	12982462	0.39058
S2_16171396	VaccDscaff2	16171396	0.390448
S4_38184948	VaccDscaff4	38184948	0.390448
S11_36867908	VaccDscaff11	36867908	0.390448
S13_29976615	VaccDscaff13	29976615	0.390448
S17_11187399	VaccDscaff17	11187399	0.390448
S17_19365256	VaccDscaff17	19365256	0.390448
S17_21010884	VaccDscaff17	21010884	0.390448
S17_36245096	VaccDscaff17	36245096	0.390448
S21_21301169	VaccDscaff21	21301169	0.390448
S22_5593900	VaccDscaff22	5593900	0.390448
S22_21811936	VaccDscaff22	21811936	0.390448
S1_22961361	VaccDscaff1	22961361	0.388989
S1_33449416	VaccDscaff1	33449416	0.388989
S7_6403195	VaccDscaff7	6403195	0.388989
S7_18120457	VaccDscaff7	18120457	0.388989
S13_27759011	VaccDscaff13	27759011	0.388989
S1_19813146	VaccDscaff1	19813146	0.388668
S2_33391246	VaccDscaff2	33391246	0.388668
S6_13042297	VaccDscaff6	13042297	0.388668
S7_6970837	VaccDscaff7	6970837	0.388668
S7_14586950	VaccDscaff7	14586950	0.388668
S7_40838363	VaccDscaff7	40838363	0.388668
S12_31760906	VaccDscaff12	31760906	0.388668
S13_19466313	VaccDscaff13	19466313	0.388668
S13_24354380	VaccDscaff13	24354380	0.388668
S21_29193733	VaccDscaff21	29193733	0.388668
S22_1702848	VaccDscaff22	1702848	0.388668
S1_23655871	VaccDscaff1	23655871	0.388628
S6_22017106	VaccDscaff6	22017106	0.388628
S22_10310811	VaccDscaff22	10310811	0.388628
S13_28607740	VaccDscaff13	28607740	0.388448
S7_39775123	VaccDscaff7	39775123	0.388324
S2_36454345	VaccDscaff2	36454345	0.387108
S1_17863232	VaccDscaff1	17863232	0.386471
S1_17876702	VaccDscaff1	17876702	0.386471
S1_23171182	VaccDscaff1	23171182	0.386471
S1_26714329	VaccDscaff1	26714329	0.386471
S2_26457207	VaccDscaff2	26457207	0.386471
S2_32292429	VaccDscaff2	32292429	0.386471
S6_10151021	VaccDscaff6	10151021	0.386471
S6_24127715	VaccDscaff6	24127715	0.386471
S7_41451077	VaccDscaff7	41451077	0.386471
S11_28926780	VaccDscaff11	28926780	0.386471
S21_32094780	VaccDscaff21	32094780	0.386471
S21_36859398	VaccDscaff21	36859398	0.386471
S22_9951721	VaccDscaff22	9951721	0.386471
S11_37204868	VaccDscaff11	37204868	0.386425
S11_37204918	VaccDscaff11	37204918	0.386425
S7_13299162	VaccDscaff7	13299162	0.385981
S1_25566784	VaccDscaff1	25566784	0.385797
S2_19851495	VaccDscaff2	19851495	0.385797
S2_39714231	VaccDscaff2	39714231	0.385797
S13_39302721	VaccDscaff13	39302721	0.385797
S21_33695334	VaccDscaff21	33695334	0.385797
S2_15411845	VaccDscaff2	15411845	0.385797
S4_17911718	VaccDscaff4	17911718	0.385797
S4_40594998	VaccDscaff4	40594998	0.385797
S17_34940343	VaccDscaff17	34940343	0.385797
S22_23166448	VaccDscaff22	23166448	0.385797
S1_279189	VaccDscaff1	279189	0.385559
S1_2863358	VaccDscaff1	2863358	0.385559
S1_21053926	VaccDscaff1	21053926	0.385559
S1_21113810	VaccDscaff1	21113810	0.385559
S2_15017689	VaccDscaff2	15017689	0.385559
S2_16541278	VaccDscaff2	16541278	0.385559
S2_21040918	VaccDscaff2	21040918	0.385559
S2_21744219	VaccDscaff2	21744219	0.385559
S2_23819172	VaccDscaff2	23819172	0.385559
S2_37425668	VaccDscaff2	37425668	0.385559
S2_41221703	VaccDscaff2	41221703	0.385559
S2_43432726	VaccDscaff2	43432726	0.385559
S2_44269976	VaccDscaff2	44269976	0.385559
S2_44269985	VaccDscaff2	44269985	0.385559
S2_44628624	VaccDscaff2	44628624	0.385559
S4_25690218	VaccDscaff4	25690218	0.385559
S4_36231090	VaccDscaff4	36231090	0.385559
S6_11973119	VaccDscaff6	11973119	0.385559
S7_28820441	VaccDscaff7	28820441	0.385559
S7_30438268	VaccDscaff7	30438268	0.385559
S7_34428600	VaccDscaff7	34428600	0.385559
S11_22666468	VaccDscaff11	22666468	0.385559
S11_27689974	VaccDscaff11	27689974	0.385559
S11_35686508	VaccDscaff11	35686508	0.385559
S11_39505210	VaccDscaff11	39505210	0.385559
S12_9501671	VaccDscaff12	9501671	0.385559
S12_13521045	VaccDscaff12	13521045	0.385559
S12_23215202	VaccDscaff12	23215202	0.385559
S12_31591843	VaccDscaff12	31591843	0.385559
S13_5042726	VaccDscaff13	5042726	0.385559
S17_13328439	VaccDscaff17	13328439	0.385559
S17_22695692	VaccDscaff17	22695692	0.385559
S17_26597169	VaccDscaff17	26597169	0.385559
S20_17594580	VaccDscaff20	17594580	0.385559
S20_17594622	VaccDscaff20	17594622	0.385559
S20_19724572	VaccDscaff20	19724572	0.385559
S20_19744769	VaccDscaff20	19744769	0.385559
S20_19831688	VaccDscaff20	19831688	0.385559
S20_19831701	VaccDscaff20	19831701	0.385559
S20_22340293	VaccDscaff20	22340293	0.385559
S21_7036754	VaccDscaff21	7036754	0.385559
S21_7037009	VaccDscaff21	7037009	0.385559
S21_16713447	VaccDscaff21	16713447	0.385559
S21_24538512	VaccDscaff21	24538512	0.385559
S21_27993167	VaccDscaff21	27993167	0.385559
S21_27993187	VaccDscaff21	27993187	0.385559
S21_29262287	VaccDscaff21	29262287	0.385559
S22_11971806	VaccDscaff22	11971806	0.385559
S22_29587752	VaccDscaff22	29587752	0.385559
S11_12814144	VaccDscaff11	12814144	0.385417
S7_28026096	VaccDscaff7	28026096	0.385096
S7_38910048	VaccDscaff7	38910048	0.385096
S7_6034660	VaccDscaff7	6034660	0.385089
S22_659299	VaccDscaff22	659299	0.385089
S1_45255607	VaccDscaff1	45255607	0.384744
S2_2782175	VaccDscaff2	2782175	0.384744
S2_20803840	VaccDscaff2	20803840	0.384744
S4_9385621	VaccDscaff4	9385621	0.384744
S6_27054803	VaccDscaff6	27054803	0.384744
S6_27102319	VaccDscaff6	27102319	0.384744
S13_20912924	VaccDscaff13	20912924	0.384744
S13_24067074	VaccDscaff13	24067074	0.384744
S13_39289993	VaccDscaff13	39289993	0.384744
S17_35508379	VaccDscaff17	35508379	0.384744
S13_27378318	VaccDscaff13	27378318	0.383658
S13_13978590	VaccDscaff13	13978590	0.383656
S13_13978628	VaccDscaff13	13978628	0.383656
S13_13978629	VaccDscaff13	13978629	0.383656
S7_7372333	VaccDscaff7	7372333	0.383172
S13_19250937	VaccDscaff13	19250937	0.383172
S13_38254970	VaccDscaff13	38254970	0.383031
S7_41143885	VaccDscaff7	41143885	0.382982
S2_8900996	VaccDscaff2	8900996	0.382764
S2_28139139	VaccDscaff2	28139139	0.382764
S2_29669216	VaccDscaff2	29669216	0.382764
S2_32712458	VaccDscaff2	32712458	0.382764
S2_35360983	VaccDscaff2	35360983	0.382764
S4_8361859	VaccDscaff4	8361859	0.382764
S4_23915596	VaccDscaff4	23915596	0.382764
S6_20110023	VaccDscaff6	20110023	0.382764
S6_27834422	VaccDscaff6	27834422	0.382764
S7_4769287	VaccDscaff7	4769287	0.382764
S7_6360163	VaccDscaff7	6360163	0.382764
S7_16932714	VaccDscaff7	16932714	0.382764
S7_21230484	VaccDscaff7	21230484	0.382764
S7_26881531	VaccDscaff7	26881531	0.382764
S11_24302163	VaccDscaff11	24302163	0.382764
S11_39219103	VaccDscaff11	39219103	0.382764
S12_37263764	VaccDscaff12	37263764	0.382764
S13_18850713	VaccDscaff13	18850713	0.382764
S13_18850856	VaccDscaff13	18850856	0.382764
S13_18850858	VaccDscaff13	18850858	0.382764
S17_14235380	VaccDscaff17	14235380	0.382764
S17_21791189	VaccDscaff17	21791189	0.382764
S20_4502910	VaccDscaff20	4502910	0.382764
S20_6692513	VaccDscaff20	6692513	0.382764
S21_28787236	VaccDscaff21	28787236	0.382764
S21_36554656	VaccDscaff21	36554656	0.382764
S21_36554664	VaccDscaff21	36554664	0.382764
S22_2577881	VaccDscaff22	2577881	0.382764
S1_17770296	VaccDscaff1	17770296	0.382054
S21_31742258	VaccDscaff21	31742258	0.382054
S1_19861684	VaccDscaff1	19861684	0.38152
S1_25520621	VaccDscaff1	25520621	0.38152
S1_25711337	VaccDscaff1	25711337	0.38152
S1_32721211	VaccDscaff1	32721211	0.38152
S1_32721271	VaccDscaff1	32721271	0.38152
S1_33714340	VaccDscaff1	33714340	0.38152
S1_33714341	VaccDscaff1	33714341	0.38152
S2_23619642	VaccDscaff2	23619642	0.38152
S2_23619645	VaccDscaff2	23619645	0.38152
S2_28326224	VaccDscaff2	28326224	0.38152
S4_2993398	VaccDscaff4	2993398	0.38152
S4_2993399	VaccDscaff4	2993399	0.38152
S4_5814589	VaccDscaff4	5814589	0.38152
S6_3412746	VaccDscaff6	3412746	0.38152
S6_3477432	VaccDscaff6	3477432	0.38152
S6_3893327	VaccDscaff6	3893327	0.38152
S7_37162223	VaccDscaff7	37162223	0.38152
S12_35867365	VaccDscaff12	35867365	0.38152
S13_14737476	VaccDscaff13	14737476	0.38152
S17_37287059	VaccDscaff17	37287059	0.38152
S20_32208308	VaccDscaff20	32208308	0.38152
S22_14359561	VaccDscaff22	14359561	0.38152
S13_28191186	VaccDscaff13	28191186	0.381427
S22_7654898	VaccDscaff22	7654898	0.381427
S13_4780391	VaccDscaff13	4780391	0.381404
S1_40695400	VaccDscaff1	40695400	0.381165
S21_35852067	VaccDscaff21	35852067	0.380695
S7_28632810	VaccDscaff7	28632810	0.38055
S11_5826700	VaccDscaff11	5826700	0.38055
S17_19551292	VaccDscaff17	19551292	0.38055
S21_4860234	VaccDscaff21	4860234	0.38055
S20_27269098	VaccDscaff20	27269098	0.38053
S1_14448063	VaccDscaff1	14448063	0.380098
S1_18550451	VaccDscaff1	18550451	0.380098
S7_23973666	VaccDscaff7	23973666	0.380098
S1_20048119	VaccDscaff1	20048119	0.379428
S1_35548217	VaccDscaff1	35548217	0.379211
S2_33195146	VaccDscaff2	33195146	0.379211
S13_14737488	VaccDscaff13	14737488	0.379211
S13_23091492	VaccDscaff13	23091492	0.379211
S1_21223374	VaccDscaff1	21223374	0.379211
S6_21727201	VaccDscaff6	21727201	0.379211
S22_10294816	VaccDscaff22	10294816	0.378366
S11_24413200	VaccDscaff11	24413200	0.378313
S13_37883676	VaccDscaff13	37883676	0.378313
S2_25886663	VaccDscaff2	25886663	0.378066
S2_28326116	VaccDscaff2	28326116	0.378066
S2_28326200	VaccDscaff2	28326200	0.378066
S2_28326215	VaccDscaff2	28326215	0.378066
S2_28326235	VaccDscaff2	28326235	0.378066
S2_32063700	VaccDscaff2	32063700	0.378066
S4_28941160	VaccDscaff4	28941160	0.378066
S4_35184169	VaccDscaff4	35184169	0.378066
S6_10161120	VaccDscaff6	10161120	0.378066
S6_24996992	VaccDscaff6	24996992	0.378066
S6_28030432	VaccDscaff6	28030432	0.378066
S7_34934436	VaccDscaff7	34934436	0.378066
S13_6762221	VaccDscaff13	6762221	0.378066
S13_15165624	VaccDscaff13	15165624	0.378066
S13_39390292	VaccDscaff13	39390292	0.378066
S21_37170435	VaccDscaff21	37170435	0.378066
S22_2702477	VaccDscaff22	2702477	0.377761
S6_31458298	VaccDscaff6	31458298	0.377263
S13_27957768	VaccDscaff13	27957768	0.377263
S4_1622937	VaccDscaff4	1622937	0.377247
S4_1622940	VaccDscaff4	1622940	0.377247
S1_28084930	VaccDscaff1	28084930	0.377123
S1_28084945	VaccDscaff1	28084945	0.377123
S1_29722906	VaccDscaff1	29722906	0.377123
S2_11836718	VaccDscaff2	11836718	0.377123
S2_41044311	VaccDscaff2	41044311	0.377123
S7_6568355	VaccDscaff7	6568355	0.377123
S17_31265192	VaccDscaff17	31265192	0.377123
S21_9390685	VaccDscaff21	9390685	0.377123
S22_9575165	VaccDscaff22	9575165	0.377123
S1_2143881	VaccDscaff1	2143881	0.376854
S1_20692281	VaccDscaff1	20692281	0.376854
S1_28700362	VaccDscaff1	28700362	0.376854
S1_31585537	VaccDscaff1	31585537	0.376854
S1_33730597	VaccDscaff1	33730597	0.376854
S2_20752188	VaccDscaff2	20752188	0.376854
S2_20877110	VaccDscaff2	20877110	0.376854
S2_30370435	VaccDscaff2	30370435	0.376854
S2_41164135	VaccDscaff2	41164135	0.376854
S2_44041980	VaccDscaff2	44041980	0.376854
S2_44606431	VaccDscaff2	44606431	0.376854
S2_44707606	VaccDscaff2	44707606	0.376854
S2_44707614	VaccDscaff2	44707614	0.376854
S2_44742445	VaccDscaff2	44742445	0.376854
S2_44742446	VaccDscaff2	44742446	0.376854
S2_44800877	VaccDscaff2	44800877	0.376854
S4_40759407	VaccDscaff4	40759407	0.376854
S6_8889195	VaccDscaff6	8889195	0.376854
S6_8889218	VaccDscaff6	8889218	0.376854
S6_12815987	VaccDscaff6	12815987	0.376854
S6_12825379	VaccDscaff6	12825379	0.376854
S6_12825382	VaccDscaff6	12825382	0.376854
S6_14402704	VaccDscaff6	14402704	0.376854
S6_32510056	VaccDscaff6	32510056	0.376854
S7_24803572	VaccDscaff7	24803572	0.376854
S7_33253146	VaccDscaff7	33253146	0.376854
S11_23382577	VaccDscaff11	23382577	0.376854
S12_27267960	VaccDscaff12	27267960	0.376854
S17_11642175	VaccDscaff17	11642175	0.376854
S17_14464453	VaccDscaff17	14464453	0.376854
S17_19145882	VaccDscaff17	19145882	0.376854
S20_993646	VaccDscaff20	993646	0.376854
S20_1067604	VaccDscaff20	1067604	0.376854
S20_1108949	VaccDscaff20	1108949	0.376854
S20_2148226	VaccDscaff20	2148226	0.376854
S20_2148278	VaccDscaff20	2148278	0.376854
S20_18624280	VaccDscaff20	18624280	0.376854
S20_19819166	VaccDscaff20	19819166	0.376854
S20_24042796	VaccDscaff20	24042796	0.376854
S20_26156358	VaccDscaff20	26156358	0.376854
S20_37498000	VaccDscaff20	37498000	0.376854
S21_4776472	VaccDscaff21	4776472	0.376854
S21_22134054	VaccDscaff21	22134054	0.376854
S21_24895033	VaccDscaff21	24895033	0.376854
S21_32077100	VaccDscaff21	32077100	0.376854
S6_34665145	VaccDscaff6	34665145	0.376661
S13_1522216	VaccDscaff13	1522216	0.376661
S1_34642605	VaccDscaff1	34642605	0.376564
S2_8322816	VaccDscaff2	8322816	0.376564
S2_8906311	VaccDscaff2	8906311	0.376564
S2_20884920	VaccDscaff2	20884920	0.376564
S2_29179998	VaccDscaff2	29179998	0.376564
S4_8205409	VaccDscaff4	8205409	0.376564
S4_21660811	VaccDscaff4	21660811	0.376564
S6_4072776	VaccDscaff6	4072776	0.376564
S6_18953066	VaccDscaff6	18953066	0.376564
S6_23838345	VaccDscaff6	23838345	0.376564
S6_26406197	VaccDscaff6	26406197	0.376564
S6_26817252	VaccDscaff6	26817252	0.376564
S6_28049920	VaccDscaff6	28049920	0.376564
S7_19385896	VaccDscaff7	19385896	0.376564
S7_38707116	VaccDscaff7	38707116	0.376564
S12_31591816	VaccDscaff12	31591816	0.376564
S12_39001726	VaccDscaff12	39001726	0.376564
S13_18667895	VaccDscaff13	18667895	0.376564
S13_18667915	VaccDscaff13	18667915	0.376564
S13_19451117	VaccDscaff13	19451117	0.376564
S13_19744309	VaccDscaff13	19744309	0.376564
S13_33349894	VaccDscaff13	33349894	0.376564
S17_14376277	VaccDscaff17	14376277	0.376564
S17_27680966	VaccDscaff17	27680966	0.376564
S17_31041103	VaccDscaff17	31041103	0.376564
S17_31041106	VaccDscaff17	31041106	0.376564
S17_38410961	VaccDscaff17	38410961	0.376564
S17_38738382	VaccDscaff17	38738382	0.376564
S17_38738390	VaccDscaff17	38738390	0.376564
S20_9624968	VaccDscaff20	9624968	0.376564
S20_19919586	VaccDscaff20	19919586	0.376564
S12_20709213	VaccDscaff12	20709213	0.376148
S22_11619364	VaccDscaff22	11619364	0.375801
S13_28675854	VaccDscaff13	28675854	0.375348
S6_4008472	VaccDscaff6	4008472	0.37486
S1_29174164	VaccDscaff1	29174164	0.374804
S2_28687902	VaccDscaff2	28687902	0.374804
S2_33313543	VaccDscaff2	33313543	0.374804
S6_25551693	VaccDscaff6	25551693	0.374804
S7_14879795	VaccDscaff7	14879795	0.374804
S7_27780864	VaccDscaff7	27780864	0.374804
S12_15584199	VaccDscaff12	15584199	0.374804
S12_20939215	VaccDscaff12	20939215	0.374804
S13_11057793	VaccDscaff13	11057793	0.374804
S13_11057805	VaccDscaff13	11057805	0.374804
S13_18670154	VaccDscaff13	18670154	0.374804
S13_18670318	VaccDscaff13	18670318	0.374804
S13_20916024	VaccDscaff13	20916024	0.374804
S13_20916088	VaccDscaff13	20916088	0.374804
S13_20921087	VaccDscaff13	20921087	0.374804
S13_21227551	VaccDscaff13	21227551	0.374804
S13_22979651	VaccDscaff13	22979651	0.374804
S13_24067184	VaccDscaff13	24067184	0.374804
S13_24284689	VaccDscaff13	24284689	0.374804
S13_34495555	VaccDscaff13	34495555	0.374804
S17_4908402	VaccDscaff17	4908402	0.374804
S17_33969180	VaccDscaff17	33969180	0.374804
S17_35121257	VaccDscaff17	35121257	0.374804
S20_3662594	VaccDscaff20	3662594	0.374804
S20_24238395	VaccDscaff20	24238395	0.374804
S22_32816430	VaccDscaff22	32816430	0.374804
S22_32816583	VaccDscaff22	32816583	0.374804
S22_32816586	VaccDscaff22	32816586	0.374804
S22_32816595	VaccDscaff22	32816595	0.374804
S22_34025850	VaccDscaff22	34025850	0.374804
S1_32974147	VaccDscaff1	32974147	0.374251
S6_34461767	VaccDscaff6	34461767	0.374074
S13_21388857	VaccDscaff13	21388857	0.374074
S17_12914979	VaccDscaff17	12914979	0.374074
S22_31752002	VaccDscaff22	31752002	0.374074
S2_19244390	VaccDscaff2	19244390	0.373975
S6_14138951	VaccDscaff6	14138951	0.373975
S21_27962469	VaccDscaff21	27962469	0.373975
S4_13738845	VaccDscaff4	13738845	0.373617
S1_44080901	VaccDscaff1	44080901	0.37347
S2_25035292	VaccDscaff2	25035292	0.37347
S13_24320729	VaccDscaff13	24320729	0.37347
S13_32360039	VaccDscaff13	32360039	0.37347
S20_26912373	VaccDscaff20	26912373	0.37347
S7_9285060	VaccDscaff7	9285060	0.372311
S1_28047826	VaccDscaff1	28047826	0.372126
S2_24168376	VaccDscaff2	24168376	0.372126
S2_24320122	VaccDscaff2	24320122	0.372126
S2_24518120	VaccDscaff2	24518120	0.372126
S2_24945001	VaccDscaff2	24945001	0.372126
S2_30274905	VaccDscaff2	30274905	0.372126
S2_32088648	VaccDscaff2	32088648	0.372126
S2_34740337	VaccDscaff2	34740337	0.372126
S6_7952206	VaccDscaff6	7952206	0.372126
S6_7952213	VaccDscaff6	7952213	0.372126
S6_23348566	VaccDscaff6	23348566	0.372126
S7_6105298	VaccDscaff7	6105298	0.372126
S7_23029506	VaccDscaff7	23029506	0.372126
S12_35253562	VaccDscaff12	35253562	0.372126
S12_38992659	VaccDscaff12	38992659	0.372126
S13_38726906	VaccDscaff13	38726906	0.372126
S20_25027857	VaccDscaff20	25027857	0.372126
S22_14380567	VaccDscaff22	14380567	0.372126
S2_32237466	VaccDscaff2	32237466	0.371601
S2_32237487	VaccDscaff2	32237487	0.371601
S22_17780402	VaccDscaff22	17780402	0.371601
S1_1036098	VaccDscaff1	1036098	0.371518
S2_19745544	VaccDscaff2	19745544	0.371518
S4_28154945	VaccDscaff4	28154945	0.371518
S6_953276	VaccDscaff6	953276	0.371518
S7_32701068	VaccDscaff7	32701068	0.371518
S13_4526031	VaccDscaff13	4526031	0.371198
S13_15737830	VaccDscaff13	15737830	0.371198
S13_32104705	VaccDscaff13	32104705	0.371198
S13_32104717	VaccDscaff13	32104717	0.371198
S22_687895	VaccDscaff22	687895	0.371198
S1_17442504	VaccDscaff1	17442504	0.370936
S2_39857916	VaccDscaff2	39857916	0.370936
S2_39858017	VaccDscaff2	39858017	0.370936
S12_18949984	VaccDscaff12	18949984	0.370936
S17_21055216	VaccDscaff17	21055216	0.370936
S2_40387074	VaccDscaff2	40387074	0.370393
S2_40387091	VaccDscaff2	40387091	0.370393
S4_36866054	VaccDscaff4	36866054	0.370393
S7_14868756	VaccDscaff7	14868756	0.370393
S13_20843549	VaccDscaff13	20843549	0.370393
S13_29225422	VaccDscaff13	29225422	0.370393
S13_29225442	VaccDscaff13	29225442	0.370393
S17_38204570	VaccDscaff17	38204570	0.370393
S1_25217905	VaccDscaff1	25217905	0.370281
S1_29722839	VaccDscaff1	29722839	0.370281
S2_11151056	VaccDscaff2	11151056	0.370281
S2_14116345	VaccDscaff2	14116345	0.370281
S2_15501530	VaccDscaff2	15501530	0.370281
S2_17157735	VaccDscaff2	17157735	0.370281
S2_18636710	VaccDscaff2	18636710	0.370281
S2_20785571	VaccDscaff2	20785571	0.370281
S2_22851050	VaccDscaff2	22851050	0.370281
S2_23173521	VaccDscaff2	23173521	0.370281
S4_10664296	VaccDscaff4	10664296	0.370281
S4_24538933	VaccDscaff4	24538933	0.370281
S6_15700370	VaccDscaff6	15700370	0.370281
S7_7373588	VaccDscaff7	7373588	0.370281
S7_13270732	VaccDscaff7	13270732	0.370281
S7_16775191	VaccDscaff7	16775191	0.370281
S7_35663381	VaccDscaff7	35663381	0.370281
S7_35663388	VaccDscaff7	35663388	0.370281
S11_24446964	VaccDscaff11	24446964	0.370281
S12_38439474	VaccDscaff12	38439474	0.370281
S13_13486267	VaccDscaff13	13486267	0.370281
S17_13317608	VaccDscaff17	13317608	0.370281
S17_24862314	VaccDscaff17	24862314	0.370281
S17_31395243	VaccDscaff17	31395243	0.370281
S17_35808981	VaccDscaff17	35808981	0.370281
S20_925641	VaccDscaff20	925641	0.370281
S20_4462497	VaccDscaff20	4462497	0.370281
S20_6576544	VaccDscaff20	6576544	0.370281
S20_6603245	VaccDscaff20	6603245	0.370281
S20_7269222	VaccDscaff20	7269222	0.370281
S20_12472490	VaccDscaff20	12472490	0.370281
S21_10955900	VaccDscaff21	10955900	0.370281
S21_27293008	VaccDscaff21	27293008	0.370281
S21_31010037	VaccDscaff21	31010037	0.370281
S21_34044978	VaccDscaff21	34044978	0.370281
S22_31405074	VaccDscaff22	31405074	0.370281
S22_31405076	VaccDscaff22	31405076	0.370281
S22_31405096	VaccDscaff22	31405096	0.370281
S22_31405119	VaccDscaff22	31405119	0.370281
S22_31405143	VaccDscaff22	31405143	0.370281
S22_31405145	VaccDscaff22	31405145	0.370281
S6_22922476	VaccDscaff6	22922476	0.370231
S7_6901489	VaccDscaff7	6901489	0.370146
S13_18696255	VaccDscaff13	18696255	0.370079
S1_26074598	VaccDscaff1	26074598	0.369648
S2_23819197	VaccDscaff2	23819197	0.369648
S4_15288388	VaccDscaff4	15288388	0.369648
S2_11067763	VaccDscaff2	11067763	0.369437
S6_11973140	VaccDscaff6	11973140	0.369437
S7_22031235	VaccDscaff7	22031235	0.369437
S17_20033045	VaccDscaff17	20033045	0.369437
S17_35508388	VaccDscaff17	35508388	0.369437
S20_33259731	VaccDscaff20	33259731	0.369437
S20_37561313	VaccDscaff20	37561313	0.369437
S20_14369047	VaccDscaff20	14369047	0.369324
S1_19367659	VaccDscaff1	19367659	0.369041
S1_33828581	VaccDscaff1	33828581	0.369041
S2_15965358	VaccDscaff2	15965358	0.369041
S2_24683761	VaccDscaff2	24683761	0.369041
S6_21131629	VaccDscaff6	21131629	0.369041
S12_35287322	VaccDscaff12	35287322	0.369041
S13_31424046	VaccDscaff13	31424046	0.369041
S22_10194845	VaccDscaff22	10194845	0.368829
S13_36650497	VaccDscaff13	36650497	0.368748
S4_4269675	VaccDscaff4	4269675	0.367845
S4_9382670	VaccDscaff4	9382670	0.367845
S7_16890367	VaccDscaff7	16890367	0.367845
S7_28403966	VaccDscaff7	28403966	0.367845
S7_31362401	VaccDscaff7	31362401	0.367845
S7_31362416	VaccDscaff7	31362416	0.367845
S13_30518908	VaccDscaff13	30518908	0.367845
S20_7388003	VaccDscaff20	7388003	0.367845
S20_13070908	VaccDscaff20	13070908	0.367845
S20_14582501	VaccDscaff20	14582501	0.367845
S21_28722872	VaccDscaff21	28722872	0.367845
S1_17861872	VaccDscaff1	17861872	0.367709
S1_20043634	VaccDscaff1	20043634	0.367045
S4_9247747	VaccDscaff4	9247747	0.367045
S4_40760946	VaccDscaff4	40760946	0.367045
S7_2459896	VaccDscaff7	2459896	0.367045
S17_31735418	VaccDscaff17	31735418	0.367045
S1_30110994	VaccDscaff1	30110994	0.366983
S1_31561240	VaccDscaff1	31561240	0.366983
S2_20888433	VaccDscaff2	20888433	0.366983
S2_27854275	VaccDscaff2	27854275	0.366983
S4_458758	VaccDscaff4	458758	0.366983
S4_10008039	VaccDscaff4	10008039	0.366983
S4_19134244	VaccDscaff4	19134244	0.366983
S4_21662440	VaccDscaff4	21662440	0.366983
S4_31780361	VaccDscaff4	31780361	0.366983
S4_38403578	VaccDscaff4	38403578	0.366983
S4_38403644	VaccDscaff4	38403644	0.366983
S6_19793679	VaccDscaff6	19793679	0.366983
S6_24824982	VaccDscaff6	24824982	0.366983
S6_25644507	VaccDscaff6	25644507	0.366983
S6_26613361	VaccDscaff6	26613361	0.366983
S6_27101383	VaccDscaff6	27101383	0.366983
S6_27761256	VaccDscaff6	27761256	0.366983
S7_2747142	VaccDscaff7	2747142	0.366983
S7_6943590	VaccDscaff7	6943590	0.366983
S7_23130608	VaccDscaff7	23130608	0.366983
S7_24528155	VaccDscaff7	24528155	0.366983
S11_27623210	VaccDscaff11	27623210	0.366983
S12_6008552	VaccDscaff12	6008552	0.366983
S12_7976112	VaccDscaff12	7976112	0.366983
S12_7976183	VaccDscaff12	7976183	0.366983
S12_10064236	VaccDscaff12	10064236	0.366983
S12_36949842	VaccDscaff12	36949842	0.366983
S13_16673732	VaccDscaff13	16673732	0.366983
S13_20227755	VaccDscaff13	20227755	0.366983
S13_22255938	VaccDscaff13	22255938	0.366983
S17_37338176	VaccDscaff17	37338176	0.366983
S20_2317243	VaccDscaff20	2317243	0.366983
S20_2317445	VaccDscaff20	2317445	0.366983
S20_2436185	VaccDscaff20	2436185	0.366983
S20_2677460	VaccDscaff20	2677460	0.366983
S20_9726344	VaccDscaff20	9726344	0.366983
S20_22343691	VaccDscaff20	22343691	0.366983
S21_28756852	VaccDscaff21	28756852	0.366983
S22_5681226	VaccDscaff22	5681226	0.366983
S22_26204193	VaccDscaff22	26204193	0.366983
S22_31692006	VaccDscaff22	31692006	0.366983
S13_31753068	VaccDscaff13	31753068	0.365977
S13_31753100	VaccDscaff13	31753100	0.365977
S7_28175858	VaccDscaff7	28175858	0.36515
S1_20398028	VaccDscaff1	20398028	0.36514
S13_24028558	VaccDscaff13	24028558	0.36514
S6_32509814	VaccDscaff6	32509814	0.36446
S13_654742	VaccDscaff13	654742	0.36446
S13_15453027	VaccDscaff13	15453027	0.36446
S13_23473386	VaccDscaff13	23473386	0.36446
S20_12936404	VaccDscaff20	12936404	0.36446
S22_11101943	VaccDscaff22	11101943	0.36446
S1_11188295	VaccDscaff1	11188295	0.36446
S1_23598122	VaccDscaff1	23598122	0.36446
S1_28700334	VaccDscaff1	28700334	0.36446
S2_30934187	VaccDscaff2	30934187	0.36446
S4_4949717	VaccDscaff4	4949717	0.36446
S6_27050636	VaccDscaff6	27050636	0.36446
S6_27050641	VaccDscaff6	27050641	0.36446
S13_21640364	VaccDscaff13	21640364	0.36446
S13_37705619	VaccDscaff13	37705619	0.36446
S17_33188907	VaccDscaff17	33188907	0.36446
S17_35742949	VaccDscaff17	35742949	0.36446
S17_38558912	VaccDscaff17	38558912	0.36446
S20_12936527	VaccDscaff20	12936527	0.36446
S1_36230394	VaccDscaff1	36230394	0.364346
S7_6750363	VaccDscaff7	6750363	0.364346
S21_27416205	VaccDscaff21	27416205	0.364346
S1_16144335	VaccDscaff1	16144335	0.363277
S1_29376514	VaccDscaff1	29376514	0.363277
S1_33918837	VaccDscaff1	33918837	0.363277
S1_40555624	VaccDscaff1	40555624	0.363277
S2_3997877	VaccDscaff2	3997877	0.363277
S2_7405814	VaccDscaff2	7405814	0.363277
S2_14059497	VaccDscaff2	14059497	0.363277
S2_17343953	VaccDscaff2	17343953	0.363277
S2_18239759	VaccDscaff2	18239759	0.363277
S2_21548178	VaccDscaff2	21548178	0.363277
S2_34125895	VaccDscaff2	34125895	0.363277
S2_35830274	VaccDscaff2	35830274	0.363277
S2_42407070	VaccDscaff2	42407070	0.363277
S4_9322603	VaccDscaff4	9322603	0.363277
S4_9322626	VaccDscaff4	9322626	0.363277
S6_7943553	VaccDscaff6	7943553	0.363277
S6_8083218	VaccDscaff6	8083218	0.363277
S7_2545127	VaccDscaff7	2545127	0.363277
S7_9156000	VaccDscaff7	9156000	0.363277
S7_16858966	VaccDscaff7	16858966	0.363277
S7_16932931	VaccDscaff7	16932931	0.363277
S7_19267772	VaccDscaff7	19267772	0.363277
S7_35947072	VaccDscaff7	35947072	0.363277
S7_37479344	VaccDscaff7	37479344	0.363277
S11_12949970	VaccDscaff11	12949970	0.363277
S11_12949998	VaccDscaff11	12949998	0.363277
S11_12950000	VaccDscaff11	12950000	0.363277
S11_22128844	VaccDscaff11	22128844	0.363277
S12_34055679	VaccDscaff12	34055679	0.363277
S12_36734439	VaccDscaff12	36734439	0.363277
S12_38439569	VaccDscaff12	38439569	0.363277
S12_38439606	VaccDscaff12	38439606	0.363277
S12_38439609	VaccDscaff12	38439609	0.363277
S12_39427480	VaccDscaff12	39427480	0.363277
S12_39427495	VaccDscaff12	39427495	0.363277
S17_25555147	VaccDscaff17	25555147	0.363277
S20_22002672	VaccDscaff20	22002672	0.363277
S20_27385215	VaccDscaff20	27385215	0.363277
S21_4393613	VaccDscaff21	4393613	0.363277
S21_4393614	VaccDscaff21	4393614	0.363277
S21_23152306	VaccDscaff21	23152306	0.363277
S22_10649394	VaccDscaff22	10649394	0.363277
S22_12697867	VaccDscaff22	12697867	0.363277
S1_10393230	VaccDscaff1	10393230	0.362889
S6_25084701	VaccDscaff6	25084701	0.362889
S7_41340693	VaccDscaff7	41340693	0.362889
S7_40867613	VaccDscaff7	40867613	0.362776
S12_11586931	VaccDscaff12	11586931	0.362776
S2_23443456	VaccDscaff2	23443456	0.362776
S4_9280128	VaccDscaff4	9280128	0.362371
S6_4104960	VaccDscaff6	4104960	0.362371
S17_35045791	VaccDscaff17	35045791	0.362371
S22_13320781	VaccDscaff22	13320781	0.362371
S1_14872214	VaccDscaff1	14872214	0.362352
S1_23171924	VaccDscaff1	23171924	0.362352
S2_11836477	VaccDscaff2	11836477	0.362352
S2_22852035	VaccDscaff2	22852035	0.362352
S2_41933986	VaccDscaff2	41933986	0.362352
S4_18252904	VaccDscaff4	18252904	0.362352
S6_3981429	VaccDscaff6	3981429	0.362352
S6_8724315	VaccDscaff6	8724315	0.362352
S6_8877278	VaccDscaff6	8877278	0.362352
S6_32603177	VaccDscaff6	32603177	0.362352
S6_36736546	VaccDscaff6	36736546	0.362352
S6_37459965	VaccDscaff6	37459965	0.362352
S7_6509678	VaccDscaff7	6509678	0.362352
S7_11722450	VaccDscaff7	11722450	0.362352
S7_14903420	VaccDscaff7	14903420	0.362352
S7_15156193	VaccDscaff7	15156193	0.362352
S7_33983393	VaccDscaff7	33983393	0.362352
S7_35704250	VaccDscaff7	35704250	0.362352
S7_35704251	VaccDscaff7	35704251	0.362352
S7_38222157	VaccDscaff7	38222157	0.362352
S7_40947200	VaccDscaff7	40947200	0.362352
S11_36049257	VaccDscaff11	36049257	0.362352
S11_38184727	VaccDscaff11	38184727	0.362352
S11_39193074	VaccDscaff11	39193074	0.362352
S17_14070067	VaccDscaff17	14070067	0.362352
S17_14193684	VaccDscaff17	14193684	0.362352
S17_19852605	VaccDscaff17	19852605	0.362352
S17_34839076	VaccDscaff17	34839076	0.362352
S20_12336489	VaccDscaff20	12336489	0.362352
S20_14368441	VaccDscaff20	14368441	0.362352
S20_17507286	VaccDscaff20	17507286	0.362352
S20_24906467	VaccDscaff20	24906467	0.362352
S20_34612658	VaccDscaff20	34612658	0.362352
S22_9847526	VaccDscaff22	9847526	0.362352
S22_10295381	VaccDscaff22	10295381	0.362352
S22_33354141	VaccDscaff22	33354141	0.362352
S1_31567996	VaccDscaff1	31567996	0.361835
S2_23892331	VaccDscaff2	23892331	0.361835
S2_43340489	VaccDscaff2	43340489	0.361835
S7_23474337	VaccDscaff7	23474337	0.361835
S13_16673677	VaccDscaff13	16673677	0.361835
S13_19664624	VaccDscaff13	19664624	0.361835
S13_38194450	VaccDscaff13	38194450	0.361835
S21_35935909	VaccDscaff21	35935909	0.361835
S1_8140518	VaccDscaff1	8140518	0.361735
S2_33012922	VaccDscaff2	33012922	0.361735
S4_32038653	VaccDscaff4	32038653	0.361735
S6_12387259	VaccDscaff6	12387259	0.361735
S6_12387285	VaccDscaff6	12387285	0.361735
S11_22571250	VaccDscaff11	22571250	0.361735
S11_39538421	VaccDscaff11	39538421	0.361735
S13_18727571	VaccDscaff13	18727571	0.361735
S21_21298997	VaccDscaff21	21298997	0.361735
S21_21299028	VaccDscaff21	21299028	0.361735
S22_18982592	VaccDscaff22	18982592	0.361735
S17_17179146	VaccDscaff17	17179146	0.361735
S22_18982670	VaccDscaff22	18982670	0.361735
S7_16349086	VaccDscaff7	16349086	0.361708
S22_1049061	VaccDscaff22	1049061	0.361173
S2_22690346	VaccDscaff2	22690346	0.360589
S7_14280646	VaccDscaff7	14280646	0.360589
S1_24629114	VaccDscaff1	24629114	0.359875
S1_35549208	VaccDscaff1	35549208	0.359875
S2_26421631	VaccDscaff2	26421631	0.359875
S2_32046490	VaccDscaff2	32046490	0.359875
S2_35519982	VaccDscaff2	35519982	0.359875
S6_31892401	VaccDscaff6	31892401	0.359875
S12_39103834	VaccDscaff12	39103834	0.359875
S2_33308128	VaccDscaff2	33308128	0.358729
S17_3151369	VaccDscaff17	3151369	0.358729
S17_38488887	VaccDscaff17	38488887	0.358729
S17_38489129	VaccDscaff17	38489129	0.358729
S17_19932803	VaccDscaff17	19932803	0.358538
S22_18936293	VaccDscaff22	18936293	0.358538
S22_34054974	VaccDscaff22	34054974	0.358538
S2_25022286	VaccDscaff2	25022286	0.358445
S2_25254845	VaccDscaff2	25254845	0.358445
S1_14188539	VaccDscaff1	14188539	0.358278
S2_8400693	VaccDscaff2	8400693	0.357299
S2_23445200	VaccDscaff2	23445200	0.357299
S22_32176534	VaccDscaff22	32176534	0.357236
S6_10134283	VaccDscaff6	10134283	0.357166
S13_25796060	VaccDscaff13	25796060	0.357166
S1_28050680	VaccDscaff1	28050680	0.357029
S1_28050695	VaccDscaff1	28050695	0.357029
S1_33699950	VaccDscaff1	33699950	0.357029
S2_41247149	VaccDscaff2	41247149	0.357029
S2_41247153	VaccDscaff2	41247153	0.357029
S6_12637301	VaccDscaff6	12637301	0.357029
S6_23903892	VaccDscaff6	23903892	0.357029
S6_27414418	VaccDscaff6	27414418	0.357029
S6_27414428	VaccDscaff6	27414428	0.357029
S7_26923807	VaccDscaff7	26923807	0.357029
S7_32035375	VaccDscaff7	32035375	0.357029
S13_20874901	VaccDscaff13	20874901	0.357029
S22_26585137	VaccDscaff22	26585137	0.357029
S22_33402592	VaccDscaff22	33402592	0.357029
S4_31013086	VaccDscaff4	31013086	0.35616
S21_31018697	VaccDscaff21	31018697	0.35616
S2_27302510	VaccDscaff2	27302510	0.356103
S4_29891223	VaccDscaff4	29891223	0.356103
S7_35066527	VaccDscaff7	35066527	0.356103
S13_7454343	VaccDscaff13	7454343	0.356103
S20_4462012	VaccDscaff20	4462012	0.356103
S20_4462023	VaccDscaff20	4462023	0.356103
S20_22002696	VaccDscaff20	22002696	0.356103
S20_29649760	VaccDscaff20	29649760	0.356103
S21_30194054	VaccDscaff21	30194054	0.356103
S22_219176	VaccDscaff22	219176	0.356103
S7_41143932	VaccDscaff7	41143932	0.35543
S2_40767099	VaccDscaff2	40767099	0.355286
S1_1051332	VaccDscaff1	1051332	0.35509
S1_16190210	VaccDscaff1	16190210	0.35509
S1_20370119	VaccDscaff1	20370119	0.35509
S1_20370123	VaccDscaff1	20370123	0.35509
S1_20370312	VaccDscaff1	20370312	0.35509
S2_1260054	VaccDscaff2	1260054	0.35509
S2_16171349	VaccDscaff2	16171349	0.35509
S2_18769198	VaccDscaff2	18769198	0.35509
S2_21558197	VaccDscaff2	21558197	0.35509
S2_22548278	VaccDscaff2	22548278	0.35509
S2_27262360	VaccDscaff2	27262360	0.35509
S2_28127069	VaccDscaff2	28127069	0.35509
S2_28139119	VaccDscaff2	28139119	0.35509
S2_28139160	VaccDscaff2	28139160	0.35509
S2_41873412	VaccDscaff2	41873412	0.35509
S2_43009643	VaccDscaff2	43009643	0.35509
S2_43009663	VaccDscaff2	43009663	0.35509
S2_43009666	VaccDscaff2	43009666	0.35509
S2_43009667	VaccDscaff2	43009667	0.35509
S2_43009675	VaccDscaff2	43009675	0.35509
S2_43009677	VaccDscaff2	43009677	0.35509
S2_43009688	VaccDscaff2	43009688	0.35509
S2_43009692	VaccDscaff2	43009692	0.35509
S2_44127080	VaccDscaff2	44127080	0.35509
S2_44502568	VaccDscaff2	44502568	0.35509
S4_23143140	VaccDscaff4	23143140	0.35509
S6_3930431	VaccDscaff6	3930431	0.35509
S6_8872174	VaccDscaff6	8872174	0.35509
S6_16417479	VaccDscaff6	16417479	0.35509
S6_24223255	VaccDscaff6	24223255	0.35509
S6_25135472	VaccDscaff6	25135472	0.35509
S6_26106815	VaccDscaff6	26106815	0.35509
S6_27653263	VaccDscaff6	27653263	0.35509
S6_32605871	VaccDscaff6	32605871	0.35509
S6_34517620	VaccDscaff6	34517620	0.35509
S7_10411610	VaccDscaff7	10411610	0.35509
S7_14467932	VaccDscaff7	14467932	0.35509
S7_14893021	VaccDscaff7	14893021	0.35509
S7_15152975	VaccDscaff7	15152975	0.35509
S11_22482129	VaccDscaff11	22482129	0.35509
S11_27739737	VaccDscaff11	27739737	0.35509
[truncated: 84,175 more rows]

## Sheet: Table-S5
Table S5. Nucleotide diversity indices for NHB and SHB cultivars used in this study
NHB Diversity Analysis				SHB Diversity Analysis
	PiPerBP	ThetaPerBP			PiPerBP	ThetaPerBP
Scaffold1	0.308632	0.283216		Scaffold1	0.347291	0.340938
Scaffold2	0.303579	0.279527		Scaffold2	0.352438	0.338843
Scaffold4	0.307997	0.279259		Scaffold4	0.350165	0.339303
Scaffold6	0.305823	0.279799		Scaffold6	0.349905	0.338904
Scaffold7	0.305888	0.281747		Scaffold7	0.354074	0.340235
Scaffold11	0.309128	0.279957		Scaffold11	0.341751	0.3391
Scaffold12	0.305025	0.281331		Scaffold12	0.350367	0.340661
Scaffold13	0.30771	0.280988		Scaffold13	0.349116	0.339792
Scaffold17	0.30856	0.279587		Scaffold17	0.349336	0.337899
Scaffold20	0.304181	0.279933		Scaffold20	0.347266	0.341268
Scaffold21	0.304272	0.279429		Scaffold21	0.348056	0.340192
Scaffold22	0.29902	0.280735		Scaffold22	0.343633	0.340013

## Sheet: Table-S6
Table S6. Details of the haplotype block information of NHB cultivars across all the scaffolds
Markers	Chromosome	Position	Block #
S1_2276776	VaccDscaff1	2276776	1
S1_2276785	VaccDscaff1	2276785	1
S1_3137047	VaccDscaff1	3137047	2
S1_3137052	VaccDscaff1	3137052	2
S1_3337191	VaccDscaff1	3337191	3
S1_3337205	VaccDscaff1	3337205	3
S1_4307970	VaccDscaff1	4307970	4
S1_4307989	VaccDscaff1	4307989	4
S1_4357467	VaccDscaff1	4357467	5
S1_4357478	VaccDscaff1	4357478	5
S1_5148506	VaccDscaff1	5148506	6
S1_5148513	VaccDscaff1	5148513	6
S1_7036001	VaccDscaff1	7036001	7
S1_7036004	VaccDscaff1	7036004	7
S1_7670619	VaccDscaff1	7670619	8
S1_7670646	VaccDscaff1	7670646	8
S1_9402381	VaccDscaff1	9402381	9
S1_9402411	VaccDscaff1	9402411	9
S1_9402421	VaccDscaff1	9402421	9
S1_9675544	VaccDscaff1	9675544	10
S1_9675573	VaccDscaff1	9675573	10
S1_9675632	VaccDscaff1	9675632	11
S1_9675641	VaccDscaff1	9675641	11
S1_10974847	VaccDscaff1	10974847	12
S1_10974848	VaccDscaff1	10974848	12
S1_12869914	VaccDscaff1	12869914	13
S1_12869926	VaccDscaff1	12869926	13
S1_12869927	VaccDscaff1	12869927	13
S1_14024043	VaccDscaff1	14024043	14
S1_14024051	VaccDscaff1	14024051	14
S1_15738247	VaccDscaff1	15738247	15
S1_15738259	VaccDscaff1	15738259	15
S1_15738274	VaccDscaff1	15738274	16
S1_15738275	VaccDscaff1	15738275	16
S1_16627873	VaccDscaff1	16627873	17
S1_16627888	VaccDscaff1	16627888	17
S1_16627890	VaccDscaff1	16627890	17
S1_16627892	VaccDscaff1	16627892	17
S1_17770230	VaccDscaff1	17770230	18
S1_17770242	VaccDscaff1	17770242	18
S1_17770263	VaccDscaff1	17770263	18
S1_17781499	VaccDscaff1	17781499	19
S1_17781512	VaccDscaff1	17781512	19
S1_17996446	VaccDscaff1	17996446	20
S1_17996462	VaccDscaff1	17996462	20
S1_20149091	VaccDscaff1	20149091	21
S1_20149094	VaccDscaff1	20149094	21
S1_21223394	VaccDscaff1	21223394	22
S1_21223410	VaccDscaff1	21223410	22
S1_21223411	VaccDscaff1	21223411	22
S1_23949586	VaccDscaff1	23949586	23
S1_23949592	VaccDscaff1	23949592	23
S1_25566755	VaccDscaff1	25566755	24
S1_25566756	VaccDscaff1	25566756	24
S1_27240988	VaccDscaff1	27240988	25
S1_27240995	VaccDscaff1	27240995	25
S1_28578142	VaccDscaff1	28578142	26
S1_28578165	VaccDscaff1	28578165	26
S1_29644495	VaccDscaff1	29644495	27
S1_29644508	VaccDscaff1	29644508	27
S1_32019480	VaccDscaff1	32019480	28
S1_32019489	VaccDscaff1	32019489	28
S1_33205694	VaccDscaff1	33205694	29
S1_33205695	VaccDscaff1	33205695	29
S1_33205698	VaccDscaff1	33205698	29
S1_33205725	VaccDscaff1	33205725	29
S1_33205731	VaccDscaff1	33205731	29
S1_33205739	VaccDscaff1	33205739	29
S1_33205744	VaccDscaff1	33205744	29
S1_37284393	VaccDscaff1	37284393	30
S1_37284404	VaccDscaff1	37284404	30
S1_37372671	VaccDscaff1	37372671	31
S1_37372714	VaccDscaff1	37372714	31
S1_37372715	VaccDscaff1	37372715	31
S1_37483884	VaccDscaff1	37483884	32
S1_37483890	VaccDscaff1	37483890	32
S1_37542249	VaccDscaff1	37542249	33
S1_37542263	VaccDscaff1	37542263	33
S1_37542302	VaccDscaff1	37542302	34
S1_37542304	VaccDscaff1	37542304	34
S1_38152256	VaccDscaff1	38152256	35
S1_38152269	VaccDscaff1	38152269	35
S1_38152272	VaccDscaff1	38152272	35
S1_38152273	VaccDscaff1	38152273	35
S1_39098779	VaccDscaff1	39098779	36
S1_39098786	VaccDscaff1	39098786	36
S1_39197981	VaccDscaff1	39197981	37
S1_39198004	VaccDscaff1	39198004	37
S1_39650734	VaccDscaff1	39650734	38
S1_39650745	VaccDscaff1	39650745	38
S1_39650751	VaccDscaff1	39650751	38
S1_39695788	VaccDscaff1	39695788	39
S1_39695816	VaccDscaff1	39695816	39
S1_40504622	VaccDscaff1	40504622	40
S1_40504623	VaccDscaff1	40504623	40
S1_40540403	VaccDscaff1	40540403	41
S1_40540422	VaccDscaff1	40540422	41
S1_40540436	VaccDscaff1	40540436	41
S1_40646138	VaccDscaff1	40646138	42
S1_40646139	VaccDscaff1	40646139	42
S1_40646146	VaccDscaff1	40646146	42
S1_40646175	VaccDscaff1	40646175	43
S1_40646177	VaccDscaff1	40646177	43
S1_40973282	VaccDscaff1	40973282	44
S1_40973288	VaccDscaff1	40973288	44
S1_40973297	VaccDscaff1	40973297	44
S1_40973468	VaccDscaff1	40973468	45
S1_40973489	VaccDscaff1	40973489	45
S1_42548320	VaccDscaff1	42548320	46
S1_42548333	VaccDscaff1	42548333	46
S1_42675557	VaccDscaff1	42675557	47
S1_42675569	VaccDscaff1	42675569	47
S1_42675570	VaccDscaff1	42675570	47
S1_42675581	VaccDscaff1	42675581	47
S1_43627992	VaccDscaff1	43627992	48
S1_43628001	VaccDscaff1	43628001	48
S1_43628007	VaccDscaff1	43628007	48
S1_44209011	VaccDscaff1	44209011	49
S1_44209039	VaccDscaff1	44209039	49
S1_44209041	VaccDscaff1	44209041	49
S1_45448626	VaccDscaff1	45448626	50
S1_45448632	VaccDscaff1	45448632	50
S2_655436	VaccDscaff2	655436	51
S2_663991	VaccDscaff2	663991	51
S2_664017	VaccDscaff2	664017	52
S2_664031	VaccDscaff2	664031	52
S2_2782163	VaccDscaff2	2782163	53
S2_2782172	VaccDscaff2	2782172	53
S2_2782250	VaccDscaff2	2782250	54
S2_2782267	VaccDscaff2	2782267	54
S2_2782334	VaccDscaff2	2782334	54
S2_2889371	VaccDscaff2	2889371	55
S2_2889381	VaccDscaff2	2889381	55
S2_3071408	VaccDscaff2	3071408	56
S2_3071413	VaccDscaff2	3071413	56
S2_5202355	VaccDscaff2	5202355	57
S2_5202373	VaccDscaff2	5202373	57
S2_5202374	VaccDscaff2	5202374	57
S2_6386875	VaccDscaff2	6386875	58
S2_6386893	VaccDscaff2	6386893	58
S2_8757520	VaccDscaff2	8757520	59
S2_8757527	VaccDscaff2	8757527	59
S2_9052433	VaccDscaff2	9052433	60
S2_9052480	VaccDscaff2	9052480	60
S2_9052527	VaccDscaff2	9052527	60
S2_9655846	VaccDscaff2	9655846	61
S2_9655870	VaccDscaff2	9655870	61
S2_10387259	VaccDscaff2	10387259	62
S2_10387325	VaccDscaff2	10387325	62
S2_11181818	VaccDscaff2	11181818	63
S2_11181830	VaccDscaff2	11181830	63
S2_11653795	VaccDscaff2	11653795	64
S2_11653796	VaccDscaff2	11653796	64
S2_11653799	VaccDscaff2	11653799	64
S2_11799437	VaccDscaff2	11799437	65
S2_11799464	VaccDscaff2	11799464	65
S2_11836380	VaccDscaff2	11836380	66
S2_11836381	VaccDscaff2	11836381	66
S2_13720121	VaccDscaff2	13720121	67
S2_13720122	VaccDscaff2	13720122	67
S2_13720143	VaccDscaff2	13720143	68
S2_13720145	VaccDscaff2	13720145	68
S2_13720148	VaccDscaff2	13720148	68
S2_16156980	VaccDscaff2	16156980	69
S2_16156989	VaccDscaff2	16156989	69
S2_17242792	VaccDscaff2	17242792	70
S2_17242818	VaccDscaff2	17242818	70
S2_17242823	VaccDscaff2	17242823	70
S2_18689241	VaccDscaff2	18689241	71
S2_18689307	VaccDscaff2	18689307	71
S2_19753858	VaccDscaff2	19753858	72
S2_19753860	VaccDscaff2	19753860	72
S2_19851465	VaccDscaff2	19851465	73
S2_19851582	VaccDscaff2	19851582	73
S2_19871358	VaccDscaff2	19871358	74
S2_19871385	VaccDscaff2	19871385	74
S2_20228875	VaccDscaff2	20228875	75
S2_20228897	VaccDscaff2	20228897	75
S2_22472370	VaccDscaff2	22472370	76
S2_22472373	VaccDscaff2	22472373	76
S2_22472401	VaccDscaff2	22472401	76
S2_23882186	VaccDscaff2	23882186	77
S2_23882188	VaccDscaff2	23882188	77
S2_28699098	VaccDscaff2	28699098	78
S2_28699105	VaccDscaff2	28699105	78
S2_28699109	VaccDscaff2	28699109	78
S2_28699110	VaccDscaff2	28699110	78
S2_30038266	VaccDscaff2	30038266	79
S2_30038267	VaccDscaff2	30038267	79
S2_31176817	VaccDscaff2	31176817	80
S2_31176913	VaccDscaff2	31176913	80
S2_34977580	VaccDscaff2	34977580	81
S2_34977616	VaccDscaff2	34977616	81
S2_36731287	VaccDscaff2	36731287	82
S2_36731332	VaccDscaff2	36731332	82
S2_37220965	VaccDscaff2	37220965	83
S2_37221014	VaccDscaff2	37221014	83
S2_39072049	VaccDscaff2	39072049	84
S2_39072067	VaccDscaff2	39072067	84
S2_39714198	VaccDscaff2	39714198	85
S2_39714234	VaccDscaff2	39714234	85
S2_41087217	VaccDscaff2	41087217	86
S2_41087230	VaccDscaff2	41087230	86
S2_41087236	VaccDscaff2	41087236	86
S2_41651539	VaccDscaff2	41651539	87
S2_41651542	VaccDscaff2	41651542	87
S2_42770983	VaccDscaff2	42770983	88
S2_42770989	VaccDscaff2	42770989	88
S2_43502393	VaccDscaff2	43502393	89
S2_43502410	VaccDscaff2	43502410	89
S4_4609896	VaccDscaff4	4609896	90
S4_4609926	VaccDscaff4	4609926	90
S4_5418632	VaccDscaff4	5418632	91
S4_5418647	VaccDscaff4	5418647	91
S4_5587468	VaccDscaff4	5587468	92
S4_5587567	VaccDscaff4	5587567	92
S4_5747847	VaccDscaff4	5747847	93
S4_5747852	VaccDscaff4	5747852	93
S4_5747860	VaccDscaff4	5747860	93
S4_6159928	VaccDscaff4	6159928	94
S4_6159932	VaccDscaff4	6159932	94
S4_6159956	VaccDscaff4	6159956	94
S4_6159973	VaccDscaff4	6159973	94
S4_6314376	VaccDscaff4	6314376	95
S4_6314425	VaccDscaff4	6314425	95
S4_11610977	VaccDscaff4	11610977	96
S4_11611006	VaccDscaff4	11611006	96
S4_11895976	VaccDscaff4	11895976	97
S4_11895992	VaccDscaff4	11895992	97
S4_11896005	VaccDscaff4	11896005	97
S4_11967974	VaccDscaff4	11967974	98
S4_11967981	VaccDscaff4	11967981	98
S4_11980158	VaccDscaff4	11980158	99
S4_11980169	VaccDscaff4	11980169	99
S4_12388550	VaccDscaff4	12388550	100
S4_12388551	VaccDscaff4	12388551	100
S4_13517176	VaccDscaff4	13517176	101
S4_13517179	VaccDscaff4	13517179	101
S4_15013548	VaccDscaff4	15013548	102
S4_15013551	VaccDscaff4	15013551	102
S4_15356115	VaccDscaff4	15356115	103
S4_15356116	VaccDscaff4	15356116	103
S4_16176850	VaccDscaff4	16176850	104
S4_16176875	VaccDscaff4	16176875	104
S4_17211082	VaccDscaff4	17211082	105
S4_17211088	VaccDscaff4	17211088	105
S4_21212336	VaccDscaff4	21212336	106
S4_21212356	VaccDscaff4	21212356	106
S4_22642978	VaccDscaff4	22642978	107
S4_22643009	VaccDscaff4	22643009	107
S4_24834851	VaccDscaff4	24834851	108
S4_24834870	VaccDscaff4	24834870	108
S4_24834876	VaccDscaff4	24834876	108
S4_28306752	VaccDscaff4	28306752	109
S4_28306754	VaccDscaff4	28306754	109
S4_29437174	VaccDscaff4	29437174	110
S4_29437191	VaccDscaff4	29437191	110
S4_29478416	VaccDscaff4	29478416	111
S4_29478452	VaccDscaff4	29478452	111
S4_30355850	VaccDscaff4	30355850	112
S4_30355928	VaccDscaff4	30355928	112
S4_31361619	VaccDscaff4	31361619	113
S4_31361620	VaccDscaff4	31361620	113
S4_31932556	VaccDscaff4	31932556	114
S4_31932577	VaccDscaff4	31932577	114
S4_32638812	VaccDscaff4	32638812	115
S4_32638821	VaccDscaff4	32638821	115
S4_32697672	VaccDscaff4	32697672	116
S4_32697678	VaccDscaff4	32697678	116
S4_34281157	VaccDscaff4	34281157	117
S4_34281173	VaccDscaff4	34281173	117
S4_34904662	VaccDscaff4	34904662	118
S4_34904668	VaccDscaff4	34904668	118
S4_35455995	VaccDscaff4	35455995	119
S4_35456008	VaccDscaff4	35456008	119
S4_36485070	VaccDscaff4	36485070	120
S4_36485074	VaccDscaff4	36485074	120
S4_38923532	VaccDscaff4	38923532	121
S4_38923534	VaccDscaff4	38923534	121
S4_38957236	VaccDscaff4	38957236	122
S4_38957245	VaccDscaff4	38957245	122
S4_38957248	VaccDscaff4	38957248	122
S4_38957251	VaccDscaff4	38957251	122
S4_38957258	VaccDscaff4	38957258	122
S4_38957294	VaccDscaff4	38957294	122
S4_38957296	VaccDscaff4	38957296	122
S4_38957300	VaccDscaff4	38957300	122
S4_38957302	VaccDscaff4	38957302	122
S4_40758715	VaccDscaff4	40758715	123
S4_40758719	VaccDscaff4	40758719	123
S4_40758722	VaccDscaff4	40758722	123
S4_40758764	VaccDscaff4	40758764	123
S6_3743356	VaccDscaff6	3743356	124
S6_3743357	VaccDscaff6	3743357	124
S6_3897868	VaccDscaff6	3897868	125
S6_3897870	VaccDscaff6	3897870	125
S6_4434727	VaccDscaff6	4434727	126
S6_4434763	VaccDscaff6	4434763	126
S6_4918746	VaccDscaff6	4918746	127
S6_4918747	VaccDscaff6	4918747	127
S6_6974211	VaccDscaff6	6974211	128
S6_6974212	VaccDscaff6	6974212	128
S6_6974220	VaccDscaff6	6974220	129
S6_6974241	VaccDscaff6	6974241	129
S6_6974307	VaccDscaff6	6974307	129
S6_6974344	VaccDscaff6	6974344	130
S6_6974345	VaccDscaff6	6974345	130
S6_7310994	VaccDscaff6	7310994	131
S6_7311038	VaccDscaff6	7311038	131
S6_7764002	VaccDscaff6	7764002	132
S6_7764015	VaccDscaff6	7764015	132
S6_8747293	VaccDscaff6	8747293	133
S6_8747317	VaccDscaff6	8747317	133
S6_10778925	VaccDscaff6	10778925	134
S6_10778953	VaccDscaff6	10778953	134
S6_10862062	VaccDscaff6	10862062	135
S6_10862064	VaccDscaff6	10862064	135
S6_10862079	VaccDscaff6	10862079	135
S6_10945644	VaccDscaff6	10945644	136
S6_10945650	VaccDscaff6	10945650	136
S6_14165309	VaccDscaff6	14165309	137
S6_14165316	VaccDscaff6	14165316	137
S6_14992339	VaccDscaff6	14992339	138
S6_14992348	VaccDscaff6	14992348	138
S6_18306354	VaccDscaff6	18306354	139
S6_18306381	VaccDscaff6	18306381	139
S6_18672881	VaccDscaff6	18672881	140
S6_18672916	VaccDscaff6	18672916	140
S6_26650715	VaccDscaff6	26650715	141
S6_26650746	VaccDscaff6	26650746	141
S6_27046334	VaccDscaff6	27046334	142
S6_27046395	VaccDscaff6	27046395	142
S6_27054803	VaccDscaff6	27054803	142
S6_27102319	VaccDscaff6	27102319	143
S6_27106392	VaccDscaff6	27106392	143
S6_27109287	VaccDscaff6	27109287	144
S6_27109313	VaccDscaff6	27109313	144
S6_27664990	VaccDscaff6	27664990	145
S6_27665004	VaccDscaff6	27665004	145
S6_27665019	VaccDscaff6	27665019	145
S6_28720604	VaccDscaff6	28720604	146
S6_28720611	VaccDscaff6	28720611	146
S6_29030935	VaccDscaff6	29030935	147
S6_29030958	VaccDscaff6	29030958	147
S6_29643304	VaccDscaff6	29643304	148
S6_29643355	VaccDscaff6	29643355	148
S6_30962003	VaccDscaff6	30962003	149
S6_30962004	VaccDscaff6	30962004	149
S6_30962006	VaccDscaff6	30962006	150
S6_30962007	VaccDscaff6	30962007	150
S6_30962023	VaccDscaff6	30962023	151
S6_30962032	VaccDscaff6	30962032	151
S6_30966091	VaccDscaff6	30966091	152
S6_30966096	VaccDscaff6	30966096	152
S6_32076085	VaccDscaff6	32076085	153
S6_32076095	VaccDscaff6	32076095	153
S6_32076100	VaccDscaff6	32076100	153
S6_32076101	VaccDscaff6	32076101	153
S6_32076108	VaccDscaff6	32076108	153
S6_33578203	VaccDscaff6	33578203	154
S6_33578257	VaccDscaff6	33578257	154
S6_34196921	VaccDscaff6	34196921	155
S6_34196995	VaccDscaff6	34196995	155
S6_36044213	VaccDscaff6	36044213	156
S6_36044218	VaccDscaff6	36044218	156
S6_36330400	VaccDscaff6	36330400	157
S6_36330411	VaccDscaff6	36330411	157
S6_39064888	VaccDscaff6	39064888	158
S6_39064903	VaccDscaff6	39064903	158
S6_39457686	VaccDscaff6	39457686	159
S6_39457701	VaccDscaff6	39457701	159
S6_39457703	VaccDscaff6	39457703	159
S6_39457710	VaccDscaff6	39457710	159
S6_39457713	VaccDscaff6	39457713	159
S6_39457736	VaccDscaff6	39457736	159
S6_40937161	VaccDscaff6	40937161	160
S6_40937178	VaccDscaff6	40937178	160
S6_41644311	VaccDscaff6	41644311	161
S6_41644351	VaccDscaff6	41644351	161
S6_41829577	VaccDscaff6	41829577	162
S6_41829580	VaccDscaff6	41829580	162
S6_42676455	VaccDscaff6	42676455	163
S6_42676470	VaccDscaff6	42676470	163
S7_2976323	VaccDscaff7	2976323	164
S7_2976345	VaccDscaff7	2976345	164
S7_3035712	VaccDscaff7	3035712	165
S7_3035737	VaccDscaff7	3035737	165
S7_4114014	VaccDscaff7	4114014	166
S7_4114032	VaccDscaff7	4114032	166
S7_4267794	VaccDscaff7	4267794	167
S7_4267810	VaccDscaff7	4267810	167
S7_4267920	VaccDscaff7	4267920	167
S7_4267940	VaccDscaff7	4267940	167
S7_4267968	VaccDscaff7	4267968	167
S7_4458993	VaccDscaff7	4458993	168
S7_4459021	VaccDscaff7	4459021	168
S7_4459028	VaccDscaff7	4459028	168
S7_4459044	VaccDscaff7	4459044	168
S7_4459158	VaccDscaff7	4459158	168
S7_4459184	VaccDscaff7	4459184	168
S7_4459195	VaccDscaff7	4459195	168
S7_5391301	VaccDscaff7	5391301	169
S7_5391302	VaccDscaff7	5391302	169
S7_5391313	VaccDscaff7	5391313	169
S7_5732739	VaccDscaff7	5732739	170
S7_5732984	VaccDscaff7	5732984	170
S7_5732985	VaccDscaff7	5732985	170
S7_7259113	VaccDscaff7	7259113	171
S7_7259134	VaccDscaff7	7259134	171
S7_8731004	VaccDscaff7	8731004	172
S7_8731018	VaccDscaff7	8731018	172
S7_8731026	VaccDscaff7	8731026	172
S7_8731037	VaccDscaff7	8731037	172
S7_8731114	VaccDscaff7	8731114	173
S7_8731116	VaccDscaff7	8731116	173
S7_9855743	VaccDscaff7	9855743	174
S7_9942739	VaccDscaff7	9942739	174
S7_9996074	VaccDscaff7	9996074	175
S7_9996088	VaccDscaff7	9996088	175
S7_10361882	VaccDscaff7	10361882	176
S7_10361886	VaccDscaff7	10361886	176
S7_10362637	VaccDscaff7	10362637	177
S7_10362654	VaccDscaff7	10362654	177
S7_10362660	VaccDscaff7	10362660	177
S7_13897890	VaccDscaff7	13897890	178
S7_13898274	VaccDscaff7	13898274	178
S7_17402584	VaccDscaff7	17402584	179
S7_17402587	VaccDscaff7	17402587	179
S7_17402607	VaccDscaff7	17402607	179
S7_19313770	VaccDscaff7	19313770	180
S7_19313776	VaccDscaff7	19313776	180
S7_19313785	VaccDscaff7	19313785	180
S7_27002346	VaccDscaff7	27002346	181
S7_27002389	VaccDscaff7	27002389	181
S7_27002398	VaccDscaff7	27002398	181
S7_30090099	VaccDscaff7	30090099	182
S7_30090154	VaccDscaff7	30090154	182
S7_30912208	VaccDscaff7	30912208	183
S7_30912214	VaccDscaff7	30912214	183
S7_32162060	VaccDscaff7	32162060	184
S7_32162062	VaccDscaff7	32162062	184
S7_34449507	VaccDscaff7	34449507	185
S7_34449534	VaccDscaff7	34449534	185
S7_34518533	VaccDscaff7	34518533	186
S7_34518536	VaccDscaff7	34518536	186
S7_34518567	VaccDscaff7	34518567	187
S7_34518577	VaccDscaff7	34518577	187
S7_35617609	VaccDscaff7	35617609	188
S7_35617636	VaccDscaff7	35617636	188
S7_35617648	VaccDscaff7	35617648	189
S7_35617651	VaccDscaff7	35617651	189
S7_35867558	VaccDscaff7	35867558	190
S7_35867559	VaccDscaff7	35867559	190
S7_41147709	VaccDscaff7	41147709	191
S7_41147713	VaccDscaff7	41147713	191
S7_41401280	VaccDscaff7	41401280	192
S7_41401369	VaccDscaff7	41401369	192
S11_136825	VaccDscaff11	136825	193
S11_136826	VaccDscaff11	136826	193
S11_136829	VaccDscaff11	136829	193
S11_359220	VaccDscaff11	359220	194
S11_359232	VaccDscaff11	359232	194
S11_477678	VaccDscaff11	477678	195
S11_477712	VaccDscaff11	477712	195
S11_477724	VaccDscaff11	477724	195
S11_477736	VaccDscaff11	477736	195
S11_477772	VaccDscaff11	477772	195
S11_2018356	VaccDscaff11	2018356	196
S11_2018397	VaccDscaff11	2018397	196
S11_6744255	VaccDscaff11	6744255	197
S11_6744259	VaccDscaff11	6744259	197
S11_10653316	VaccDscaff11	10653316	198
S11_10653319	VaccDscaff11	10653319	198
S11_10795652	VaccDscaff11	10795652	199
S11_10795682	VaccDscaff11	10795682	199
S11_13824643	VaccDscaff11	13824643	200
S11_13824649	VaccDscaff11	13824649	200
S11_13824652	VaccDscaff11	13824652	200
S11_15683915	VaccDscaff11	15683915	201
S11_15683928	VaccDscaff11	15683928	201
S11_16195532	VaccDscaff11	16195532	202
S11_16195589	VaccDscaff11	16195589	202
S11_17225381	VaccDscaff11	17225381	203
S11_17225405	VaccDscaff11	17225405	203
S11_18585456	VaccDscaff11	18585456	204
S11_18585459	VaccDscaff11	18585459	204
S11_18585493	VaccDscaff11	18585493	205
S11_18585495	VaccDscaff11	18585495	205
S11_18585546	VaccDscaff11	18585546	205
S11_20000856	VaccDscaff11	20000856	206
S11_20000862	VaccDscaff11	20000862	206
S11_20585659	VaccDscaff11	20585659	207
S11_20585951	VaccDscaff11	20585951	207
S11_20794453	VaccDscaff11	20794453	208
S11_20794459	VaccDscaff11	20794459	208
S11_22567557	VaccDscaff11	22567557	209
S11_22567567	VaccDscaff11	22567567	209
S11_26056250	VaccDscaff11	26056250	210
S11_26056266	VaccDscaff11	26056266	210
S11_27437174	VaccDscaff11	27437174	211
S11_27437175	VaccDscaff11	27437175	211
S11_27437181	VaccDscaff11	27437181	211
S11_28301453	VaccDscaff11	28301453	212
S11_28301481	VaccDscaff11	28301481	212
S11_28301482	VaccDscaff11	28301482	212
S11_29393080	VaccDscaff11	29393080	213
S11_29393082	VaccDscaff11	29393082	213
S11_29715657	VaccDscaff11	29715657	214
S11_29715660	VaccDscaff11	29715660	214
S11_29715690	VaccDscaff11	29715690	214
S11_30299485	VaccDscaff11	30299485	215
S11_30299488	VaccDscaff11	30299488	215
S11_30725630	VaccDscaff11	30725630	216
S11_30725648	VaccDscaff11	30725648	216
S11_31578304	VaccDscaff11	31578304	217
S11_31578368	VaccDscaff11	31578368	217
S11_31578374	VaccDscaff11	31578374	217
S11_33204733	VaccDscaff11	33204733	218
S11_33204741	VaccDscaff11	33204741	218
S11_33208138	VaccDscaff11	33208138	219
S11_33208139	VaccDscaff11	33208139	219
S11_33208143	VaccDscaff11	33208143	219
S11_33208179	VaccDscaff11	33208179	220
S11_33208180	VaccDscaff11	33208180	220
S11_34079133	VaccDscaff11	34079133	221
S11_34079154	VaccDscaff11	34079154	221
S11_35876614	VaccDscaff11	35876614	222
S11_35876615	VaccDscaff11	35876615	222
S11_35876622	VaccDscaff11	35876622	222
S11_38218497	VaccDscaff11	38218497	223
S11_38218502	VaccDscaff11	38218502	223
S11_39075781	VaccDscaff11	39075781	224
S11_39075782	VaccDscaff11	39075782	224
S11_39075796	VaccDscaff11	39075796	224
S12_5644549	VaccDscaff12	5644549	225
S12_5644759	VaccDscaff12	5644759	225
S12_5871285	VaccDscaff12	5871285	226
S12_5871297	VaccDscaff12	5871297	226
S12_6019725	VaccDscaff12	6019725	227
S12_6019732	VaccDscaff12	6019732	227
S12_7603147	VaccDscaff12	7603147	228
S12_7604941	VaccDscaff12	7604941	228
S12_8267269	VaccDscaff12	8267269	229
S12_8267270	VaccDscaff12	8267270	229
S12_9430694	VaccDscaff12	9430694	230
S12_9430730	VaccDscaff12	9430730	230
S12_9708432	VaccDscaff12	9708432	231
S12_9708433	VaccDscaff12	9708433	231
S12_9708448	VaccDscaff12	9708448	231
S12_11432081	VaccDscaff12	11432081	232
S12_11432090	VaccDscaff12	11432090	232
S12_12705224	VaccDscaff12	12705224	233
S12_12705259	VaccDscaff12	12705259	233
S12_13683120	VaccDscaff12	13683120	234
S12_13683126	VaccDscaff12	13683126	234
S12_13745428	VaccDscaff12	13745428	235
S12_13745434	VaccDscaff12	13745434	235
S12_13745449	VaccDscaff12	13745449	235
S12_13888507	VaccDscaff12	13888507	236
S12_13888640	VaccDscaff12	13888640	236
S12_14382104	VaccDscaff12	14382104	237
S12_14382118	VaccDscaff12	14382118	237
S12_16869001	VaccDscaff12	16869001	238
S12_16869002	VaccDscaff12	16869002	238
S12_16869005	VaccDscaff12	16869005	238
S12_16869029	VaccDscaff12	16869029	238
S12_21142746	VaccDscaff12	21142746	239
S12_21142765	VaccDscaff12	21142765	239
S12_21142768	VaccDscaff12	21142768	239
S12_24278527	VaccDscaff12	24278527	240
S12_24278587	VaccDscaff12	24278587	240
S12_24278597	VaccDscaff12	24278597	240
S12_26693384	VaccDscaff12	26693384	241
S12_26693393	VaccDscaff12	26693393	241
S12_26955537	VaccDscaff12	26955537	242
S12_26955541	VaccDscaff12	26955541	242
S12_29462210	VaccDscaff12	29462210	243
S12_29462236	VaccDscaff12	29462236	243
S12_30247215	VaccDscaff12	30247215	244
S12_30247219	VaccDscaff12	30247219	244
S12_30393782	VaccDscaff12	30393782	245
S12_30393799	VaccDscaff12	30393799	245
S12_31318827	VaccDscaff12	31318827	246
S12_31318833	VaccDscaff12	31318833	246
S12_31404230	VaccDscaff12	31404230	247
S12_31404236	VaccDscaff12	31404236	247
S12_31404237	VaccDscaff12	31404237	247
S12_31404238	VaccDscaff12	31404238	247
S12_31404293	VaccDscaff12	31404293	247
S12_33441458	VaccDscaff12	33441458	248
S12_33441512	VaccDscaff12	33441512	248
S12_36256284	VaccDscaff12	36256284	249
S12_36256327	VaccDscaff12	36256327	249
S12_36613109	VaccDscaff12	36613109	250
S12_36613118	VaccDscaff12	36613118	250
S12_36613124	VaccDscaff12	36613124	251
S12_36675629	VaccDscaff12	36675629	251
S12_36729987	VaccDscaff12	36729987	252
S12_36729991	VaccDscaff12	36729991	252
S12_38521745	VaccDscaff12	38521745	253
S12_38521765	VaccDscaff12	38521765	253
S12_38521768	VaccDscaff12	38521768	253
S12_38521867	VaccDscaff12	38521867	254
S12_38521942	VaccDscaff12	38521942	254
S12_38969411	VaccDscaff12	38969411	255
S12_38975714	VaccDscaff12	38975714	255
S13_986173	VaccDscaff13	986173	256
S13_986203	VaccDscaff13	986203	256
S13_2196106	VaccDscaff13	2196106	257
S13_2196132	VaccDscaff13	2196132	257
S13_2196135	VaccDscaff13	2196135	258
S13_2196138	VaccDscaff13	2196138	258
S13_2470346	VaccDscaff13	2470346	259
S13_2470448	VaccDscaff13	2470448	259
S13_4273151	VaccDscaff13	4273151	260
S13_4273172	VaccDscaff13	4273172	260
S13_6494447	VaccDscaff13	6494447	261
S13_6494457	VaccDscaff13	6494457	261
S13_8579829	VaccDscaff13	8579829	262
S13_8579847	VaccDscaff13	8579847	262
S13_8579871	VaccDscaff13	8579871	262
S13_8579886	VaccDscaff13	8579886	262
S13_8950429	VaccDscaff13	8950429	263
S13_8950449	VaccDscaff13	8950449	263
S13_9900220	VaccDscaff13	9900220	264
S13_9900223	VaccDscaff13	9900223	264
S13_12849703	VaccDscaff13	12849703	265
S13_12849711	VaccDscaff13	12849711	265
S13_14513106	VaccDscaff13	14513106	266
S13_14513110	VaccDscaff13	14513110	266
S13_14611415	VaccDscaff13	14611415	267
S13_14611534	VaccDscaff13	14611534	267
S13_15003944	VaccDscaff13	15003944	268
S13_15003970	VaccDscaff13	15003970	268
S13_15862897	VaccDscaff13	15862897	269
S13_15862971	VaccDscaff13	15862971	269
S13_15965588	VaccDscaff13	15965588	270
S13_15965593	VaccDscaff13	15965593	270
S13_18763311	VaccDscaff13	18763311	271
S13_18763459	VaccDscaff13	18763459	271
S13_22486747	VaccDscaff13	22486747	272
S13_22486771	VaccDscaff13	22486771	272
S13_22665075	VaccDscaff13	22665075	273
S13_22665108	VaccDscaff13	22665108	273
S13_24520621	VaccDscaff13	24520621	274
S13_24520629	VaccDscaff13	24520629	274
S13_24520659	VaccDscaff13	24520659	274
S13_27747225	VaccDscaff13	27747225	275
S13_27747793	VaccDscaff13	27747793	275
S13_27781917	VaccDscaff13	27781917	276
S13_27781931	VaccDscaff13	27781931	276
S13_30472582	VaccDscaff13	30472582	277
S13_30472605	VaccDscaff13	30472605	277
S13_31112224	VaccDscaff13	31112224	278
S13_31112239	VaccDscaff13	31112239	278
S13_31515972	VaccDscaff13	31515972	279
S13_31515973	VaccDscaff13	31515973	279
S13_31515989	VaccDscaff13	31515989	280
S13_31516010	VaccDscaff13	31516010	280
S13_31516026	VaccDscaff13	31516026	280
S13_31981242	VaccDscaff13	31981242	281
S13_31981262	VaccDscaff13	31981262	281
S13_33116128	VaccDscaff13	33116128	282
S13_33116139	VaccDscaff13	33116139	282
S13_33202856	VaccDscaff13	33202856	283
S13_33202865	VaccDscaff13	33202865	283
S13_33658102	VaccDscaff13	33658102	284
S13_33680572	VaccDscaff13	33680572	284
S13_34448720	VaccDscaff13	34448720	285
S13_34448733	VaccDscaff13	34448733	285
S13_34448734	VaccDscaff13	34448734	285
S13_34639964	VaccDscaff13	34639964	286
S13_34639983	VaccDscaff13	34639983	286
S13_34687135	VaccDscaff13	34687135	287
S13_34687144	VaccDscaff13	34687144	287
S13_34687153	VaccDscaff13	34687153	287
S13_36121668	VaccDscaff13	36121668	288
S13_36121669	VaccDscaff13	36121669	288
S13_36286783	VaccDscaff13	36286783	289
S13_36286848	VaccDscaff13	36286848	289
S13_36286875	VaccDscaff13	36286875	289
S13_37872230	VaccDscaff13	37872230	290
S13_37872237	VaccDscaff13	37872237	290
S13_39254918	VaccDscaff13	39254918	291
S13_39254958	VaccDscaff13	39254958	291
S13_39439110	VaccDscaff13	39439110	292
S13_39439177	VaccDscaff13	39439177	292
S17_334923	VaccDscaff17	334923	293
S17_334941	VaccDscaff17	334941	293
S17_334953	VaccDscaff17	334953	293
S17_335091	VaccDscaff17	335091	293
S17_730269	VaccDscaff17	730269	294
S17_735043	VaccDscaff17	735043	294
S17_735052	VaccDscaff17	735052	294
S17_5527620	VaccDscaff17	5527620	295
S17_5527697	VaccDscaff17	5527697	295
S17_5528622	VaccDscaff17	5528622	296
S17_5528631	VaccDscaff17	5528631	296
S17_6102757	VaccDscaff17	6102757	297
S17_6102758	VaccDscaff17	6102758	297
S17_7980059	VaccDscaff17	7980059	298
S17_7980090	VaccDscaff17	7980090	298
S17_7980098	VaccDscaff17	7980098	298
S17_7980123	VaccDscaff17	7980123	298
S17_8450098	VaccDscaff17	8450098	299
S17_8450104	VaccDscaff17	8450104	299
S17_10088898	VaccDscaff17	10088898	300
S17_10088925	VaccDscaff17	10088925	300
S17_10163549	VaccDscaff17	10163549	301
S17_10163557	VaccDscaff17	10163557	301
S17_11096680	VaccDscaff17	11096680	302
S17_11096681	VaccDscaff17	11096681	302
S17_11102785	VaccDscaff17	11102785	303
S17_11102808	VaccDscaff17	11102808	303
S17_11173188	VaccDscaff17	11173188	304
S17_11173210	VaccDscaff17	11173210	304
S17_11173224	VaccDscaff17	11173224	304
S17_12739282	VaccDscaff17	12739282	305
S17_12739283	VaccDscaff17	12739283	305
S17_13940229	VaccDscaff17	13940229	306
S17_13940314	VaccDscaff17	13940314	306
S17_15572577	VaccDscaff17	15572577	307
S17_15572600	VaccDscaff17	15572600	307
S17_15742367	VaccDscaff17	15742367	308
S17_15742627	VaccDscaff17	15742627	308
S17_16246249	VaccDscaff17	16246249	309
S17_16246277	VaccDscaff17	16246277	309
S17_16246293	VaccDscaff17	16246293	309
S17_18380628	VaccDscaff17	18380628	310
S17_18380632	VaccDscaff17	18380632	310
S17_20087345	VaccDscaff17	20087345	311
S17_20087353	VaccDscaff17	20087353	311
S17_20087357	VaccDscaff17	20087357	311
S17_20087361	VaccDscaff17	20087361	311
S17_20087366	VaccDscaff17	20087366	312
S17_20087369	VaccDscaff17	20087369	312
S17_20405379	VaccDscaff17	20405379	313
S17_20405381	VaccDscaff17	20405381	313
S17_24693545	VaccDscaff17	24693545	314
S17_24693623	VaccDscaff17	24693623	314
S17_24693626	VaccDscaff17	24693626	314
S17_26724268	VaccDscaff17	26724268	315
S17_26724292	VaccDscaff17	26724292	315
S17_26853155	VaccDscaff17	26853155	316
S17_26853200	VaccDscaff17	26853200	316
S17_27094898	VaccDscaff17	27094898	317
S17_27094905	VaccDscaff17	27094905	317
S17_27094907	VaccDscaff17	27094907	317
S17_27094914	VaccDscaff17	27094914	317
S17_28607777	VaccDscaff17	28607777	318
S17_28607778	VaccDscaff17	28607778	318
S17_29768430	VaccDscaff17	29768430	319
S17_29768431	VaccDscaff17	29768431	319
S17_29858897	VaccDscaff17	29858897	320
S17_29858927	VaccDscaff17	29858927	320
S17_30057396	VaccDscaff17	30057396	321
S17_30057402	VaccDscaff17	30057402	321
S17_31265149	VaccDscaff17	31265149	322
S17_31265175	VaccDscaff17	31265175	322
S17_31265208	VaccDscaff17	31265208	322
S17_31265209	VaccDscaff17	31265209	322
S17_32247577	VaccDscaff17	32247577	323
S17_32247585	VaccDscaff17	32247585	323
S17_32247593	VaccDscaff17	32247593	323
S17_32247605	VaccDscaff17	32247605	324
S17_32247606	VaccDscaff17	32247606	324
S17_32924821	VaccDscaff17	32924821	325
S17_32924837	VaccDscaff17	32924837	325
S17_34884566	VaccDscaff17	34884566	326
S17_34884568	VaccDscaff17	34884568	326
S17_35606403	VaccDscaff17	35606403	327
S17_35606417	VaccDscaff17	35606417	327
S17_37076085	VaccDscaff17	37076085	328
S17_37076086	VaccDscaff17	37076086	328
S17_37076103	VaccDscaff17	37076103	329
S17_37076112	VaccDscaff17	37076112	329
S17_37076131	VaccDscaff17	37076131	329
S17_38145985	VaccDscaff17	38145985	330
S17_38145998	VaccDscaff17	38145998	330
S17_38146013	VaccDscaff17	38146013	330
S17_38561073	VaccDscaff17	38561073	331
S17_38561154	VaccDscaff17	38561154	331
S17_38790374	VaccDscaff17	38790374	332
S17_38790377	VaccDscaff17	38790377	332
S17_38791374	VaccDscaff17	38791374	332
S20_2358786	VaccDscaff20	2358786	333
S20_2358790	VaccDscaff20	2358790	333
S20_3132984	VaccDscaff20	3132984	334
S20_3133007	VaccDscaff20	3133007	334
S20_4059717	VaccDscaff20	4059717	335
S20_4059719	VaccDscaff20	4059719	335
S20_7848485	VaccDscaff20	7848485	336
S20_7848489	VaccDscaff20	7848489	336
S20_7848493	VaccDscaff20	7848493	336
S20_8191630	VaccDscaff20	8191630	337
S20_8191642	VaccDscaff20	8191642	337
S20_8191643	VaccDscaff20	8191643	337
S20_8191654	VaccDscaff20	8191654	337
S20_8191666	VaccDscaff20	8191666	338
S20_8191672	VaccDscaff20	8191672	338
S20_9691900	VaccDscaff20	9691900	339
S20_9691904	VaccDscaff20	9691904	339
S20_10060694	VaccDscaff20	10060694	340
S20_10060711	VaccDscaff20	10060711	340
S20_10060735	VaccDscaff20	10060735	340
S20_14360108	VaccDscaff20	14360108	341
S20_14368752	VaccDscaff20	14368752	341
S20_18639526	VaccDscaff20	18639526	342
S20_18639539	VaccDscaff20	18639539	342
S20_20530246	VaccDscaff20	20530246	343
S20_20530285	VaccDscaff20	20530285	343
S20_20530288	VaccDscaff20	20530288	343
S20_21464891	VaccDscaff20	21464891	344
S20_21469204	VaccDscaff20	21469204	344
S20_23440010	VaccDscaff20	23440010	345
S20_23440029	VaccDscaff20	23440029	345
S20_23440040	VaccDscaff20	23440040	345
S20_23558694	VaccDscaff20	23558694	346
S20_23558703	VaccDscaff20	23558703	346
S20_27119581	VaccDscaff20	27119581	347
S20_27119596	VaccDscaff20	27119596	347
S20_28270020	VaccDscaff20	28270020	348
S20_28270022	VaccDscaff20	28270022	348
S20_28270028	VaccDscaff20	28270028	349
S20_28270043	VaccDscaff20	28270043	349
S20_28270046	VaccDscaff20	28270046	349
S20_30292634	VaccDscaff20	30292634	350
S20_30292635	VaccDscaff20	30292635	350
S20_32267717	VaccDscaff20	32267717	351
S20_32267720	VaccDscaff20	32267720	351
S20_32267732	VaccDscaff20	32267732	351
S20_32267737	VaccDscaff20	32267737	351
S20_32269804	VaccDscaff20	32269804	351
S20_32300347	VaccDscaff20	32300347	352
S20_32300355	VaccDscaff20	32300355	352
S20_32325811	VaccDscaff20	32325811	353
S20_32325825	VaccDscaff20	32325825	353
S20_32841816	VaccDscaff20	32841816	354
S20_32841817	VaccDscaff20	32841817	354
S20_33665847	VaccDscaff20	33665847	355
S20_33665875	VaccDscaff20	33665875	355
S20_36288061	VaccDscaff20	36288061	356
S20_36288081	VaccDscaff20	36288081	356
S21_43096	VaccDscaff21	43096	357
S21_43136	VaccDscaff21	43136	357
S21_43148	VaccDscaff21	43148	357
S21_1084321	VaccDscaff21	1084321	358
S21_1093186	VaccDscaff21	1093186	358
S21_1362537	VaccDscaff21	1362537	359
S21_1362538	VaccDscaff21	1362538	359
S21_1362555	VaccDscaff21	1362555	359
S21_1680996	VaccDscaff21	1680996	360
S21_1682854	VaccDscaff21	1682854	360
S21_1682912	VaccDscaff21	1682912	361
S21_1682913	VaccDscaff21	1682913	361
S21_2373290	VaccDscaff21	2373290	362
S21_2373300	VaccDscaff21	2373300	362
S21_2758161	VaccDscaff21	2758161	363
S21_2758163	VaccDscaff21	2758163	363
S21_3337746	VaccDscaff21	3337746	364
S21_3337753	VaccDscaff21	3337753	364
S21_3337755	VaccDscaff21	3337755	364
S21_3560485	VaccDscaff21	3560485	365
S21_3560510	VaccDscaff21	3560510	365
S21_4965231	VaccDscaff21	4965231	366
S21_4965238	VaccDscaff21	4965238	366
S21_6255741	VaccDscaff21	6255741	367
S21_6255778	VaccDscaff21	6255778	367
S21_6387739	VaccDscaff21	6387739	368
S21_6387740	VaccDscaff21	6387740	368
S21_8691129	VaccDscaff21	8691129	369
S21_8691139	VaccDscaff21	8691139	369
S21_8694812	VaccDscaff21	8694812	369
S21_10142066	VaccDscaff21	10142066	370
S21_10142076	VaccDscaff21	10142076	370
S21_11196893	VaccDscaff21	11196893	371
S21_11196903	VaccDscaff21	11196903	371
S21_13844998	VaccDscaff21	13844998	372
S21_13845002	VaccDscaff21	13845002	372
S21_17610589	VaccDscaff21	17610589	373
S21_17610590	VaccDscaff21	17610590	373
S21_18794270	VaccDscaff21	18794270	374
S21_18794283	VaccDscaff21	18794283	374
S21_20136029	VaccDscaff21	20136029	375
S21_20136038	VaccDscaff21	20136038	375
S21_21537523	VaccDscaff21	21537523	376
S21_21537563	VaccDscaff21	21537563	376
S21_23972577	VaccDscaff21	23972577	377
S21_23972592	VaccDscaff21	23972592	377
S21_23972596	VaccDscaff21	23972596	377
S21_24285890	VaccDscaff21	24285890	378
S21_24285911	VaccDscaff21	24285911	378
S21_25197581	VaccDscaff21	25197581	379
S21_25197589	VaccDscaff21	25197589	379
S21_28987048	VaccDscaff21	28987048	380
S21_28987049	VaccDscaff21	28987049	380
S21_28987051	VaccDscaff21	28987051	380
S21_30335382	VaccDscaff21	30335382	381
S21_30335391	VaccDscaff21	30335391	381
S21_32088593	VaccDscaff21	32088593	382
S21_32088602	VaccDscaff21	32088602	382
S21_33537076	VaccDscaff21	33537076	383
S21_33537082	VaccDscaff21	33537082	383
S21_33537094	VaccDscaff21	33537094	383
S21_33537144	VaccDscaff21	33537144	384
S21_33537152	VaccDscaff21	33537152	384
S21_33537168	VaccDscaff21	33537168	384
S21_33537175	VaccDscaff21	33537175	384
S21_33807975	VaccDscaff21	33807975	385
S21_33807979	VaccDscaff21	33807979	385
S21_34443185	VaccDscaff21	34443185	386
S21_34443186	VaccDscaff21	34443186	386
S21_36071563	VaccDscaff21	36071563	387
S21_36071604	VaccDscaff21	36071604	387
S21_36829668	VaccDscaff21	36829668	388
S21_36829713	VaccDscaff21	36829713	388
S21_37018493	VaccDscaff21	37018493	389
S21_37018495	VaccDscaff21	37018495	389
S21_37315044	VaccDscaff21	37315044	390
S21_37315050	VaccDscaff21	37315050	390
S21_37315051	VaccDscaff21	37315051	390
S21_37315052	VaccDscaff21	37315052	390
S21_37315059	VaccDscaff21	37315059	390
S21_37315077	VaccDscaff21	37315077	390
S21_37315081	VaccDscaff21	37315081	390
S21_37315083	VaccDscaff21	37315083	390
S21_37315089	VaccDscaff21	37315089	390
S21_37315135	VaccDscaff21	37315135	390
S21_37315164	VaccDscaff21	37315164	391
S21_37315331	VaccDscaff21	37315331	391
S21_37315332	VaccDscaff21	37315332	391
S21_37315349	VaccDscaff21	37315349	391
S21_37315358	VaccDscaff21	37315358	391
S22_1061423	VaccDscaff22	1061423	392
S22_1061458	VaccDscaff22	1061458	392
S22_1061489	VaccDscaff22	1061489	392
S22_1693508	VaccDscaff22	1693508	393
S22_1693509	VaccDscaff22	1693509	393
S22_2345328	VaccDscaff22	2345328	394
S22_2345351	VaccDscaff22	2345351	394
S22_2345371	VaccDscaff22	2345371	394
S22_2802980	VaccDscaff22	2802980	395
S22_2803009	VaccDscaff22	2803009	395
S22_3866317	VaccDscaff22	3866317	396
S22_3866350	VaccDscaff22	3866350	396
S22_3866404	VaccDscaff22	3866404	397
S22_3866437	VaccDscaff22	3866437	397
S22_5262137	VaccDscaff22	5262137	398
S22_5262145	VaccDscaff22	5262145	398
S22_6298200	VaccDscaff22	6298200	399
S22_6298210	VaccDscaff22	6298210	399
S22_8224711	VaccDscaff22	8224711	400
S22_8224720	VaccDscaff22	8224720	400
S22_8798522	VaccDscaff22	8798522	401
S22_8798526	VaccDscaff22	8798526	401
S22_10913553	VaccDscaff22	10913553	402
S22_10913554	VaccDscaff22	10913554	402
S22_11070841	VaccDscaff22	11070841	403
S22_11070875	VaccDscaff22	11070875	403
S22_11919092	VaccDscaff22	11919092	404
S22_11919130	VaccDscaff22	11919130	404
S22_14080980	VaccDscaff22	14080980	405
S22_14080982	VaccDscaff22	14080982	405
S22_14261119	VaccDscaff22	14261119	406
S22_14261130	VaccDscaff22	14261130	406
S22_14261131	VaccDscaff22	14261131	406
S22_14261163	VaccDscaff22	14261163	407
S22_14261164	VaccDscaff22	14261164	407
S22_14844318	VaccDscaff22	14844318	408
S22_14844328	VaccDscaff22	14844328	408
S22_14999979	VaccDscaff22	14999979	409
S22_14999981	VaccDscaff22	14999981	409
S22_31884464	VaccDscaff22	31884464	410
S22_31884475	VaccDscaff22	31884475	410
S22_32274440	VaccDscaff22	32274440	411
S22_32274470	VaccDscaff22	32274470	411
S22_32274492	VaccDscaff22	32274492	411
S22_34640960	VaccDscaff22	34640960	412
S22_34640964	VaccDscaff22	34640964	412
S22_34640968	VaccDscaff22	34640968	412
S22_34640973	VaccDscaff22	34640973	412
S22_34640986	VaccDscaff22	34640986	412
S22_34641012	VaccDscaff22	34641012	412
S22_35107374	VaccDscaff22	35107374	413
S22_35107412	VaccDscaff22	35107412	413
S22_35107417	VaccDscaff22	35107417	413
S22_35107419	VaccDscaff22	35107419	413
S22_36634244	VaccDscaff22	36634244	414
S22_36634275	VaccDscaff22	36634275	414
S22_36843820	VaccDscaff22	36843820	415
S22_36843850	VaccDscaff22	36843850	415
S22_36985974	VaccDscaff22	36985974	416
S22_36985983	VaccDscaff22	36985983	416

## Sheet: Table S7
Table S7. Details of the haplotype block information of SHB cultivars across all the scaffolds
Markers	Chromosome	Position	Block #
S1_3337191	VaccDscaff1	3337191	1
S1_3337205	VaccDscaff1	3337205	1
S1_10974810	VaccDscaff1	10974810	2
S1_10974847	VaccDscaff1	10974847	2
S1_10974848	VaccDscaff1	10974848	2
S1_12869914	VaccDscaff1	12869914	3
S1_12869926	VaccDscaff1	12869926	3
S1_12869927	VaccDscaff1	12869927	3
S1_15738247	VaccDscaff1	15738247	4
S1_15738259	VaccDscaff1	15738259	4
S1_16627859	VaccDscaff1	16627859	5
S1_16627862	VaccDscaff1	16627862	5
S1_20149091	VaccDscaff1	20149091	6
S1_20149094	VaccDscaff1	20149094	6
S1_25566755	VaccDscaff1	25566755	7
S1_25566756	VaccDscaff1	25566756	7
S1_27955515	VaccDscaff1	27955515	8
S1_27955818	VaccDscaff1	27955818	8
S1_28693879	VaccDscaff1	28693879	9
S1_28693965	VaccDscaff1	28693965	9
S1_28693966	VaccDscaff1	28693966	9
S1_29644887	VaccDscaff1	29644887	10
S1_29644892	VaccDscaff1	29644892	10
S1_33205725	VaccDscaff1	33205725	11
S1_33205731	VaccDscaff1	33205731	11
S1_33205739	VaccDscaff1	33205739	11
S1_33205744	VaccDscaff1	33205744	11
S1_37372671	VaccDscaff1	37372671	12
S1_37372714	VaccDscaff1	37372714	12
S1_37372715	VaccDscaff1	37372715	12
S1_37542249	VaccDscaff1	37542249	13
S1_37542263	VaccDscaff1	37542263	13
S1_37548601	VaccDscaff1	37548601	14
S1_37548641	VaccDscaff1	37548641	14
S1_38152256	VaccDscaff1	38152256	15
S1_38152269	VaccDscaff1	38152269	15
S1_38152272	VaccDscaff1	38152272	15
S1_38152273	VaccDscaff1	38152273	15
S1_38932130	VaccDscaff1	38932130	16
S1_38932131	VaccDscaff1	38932131	16
S1_38932138	VaccDscaff1	38932138	16
S1_38932146	VaccDscaff1	38932146	16
S1_38932149	VaccDscaff1	38932149	16
S1_39602095	VaccDscaff1	39602095	17
S1_39602104	VaccDscaff1	39602104	17
S1_39602107	VaccDscaff1	39602107	17
S1_39602134	VaccDscaff1	39602134	17
S1_39602137	VaccDscaff1	39602137	17
S1_40646139	VaccDscaff1	40646139	18
S1_40646146	VaccDscaff1	40646146	18
S1_40646151	VaccDscaff1	40646151	18
S1_40973282	VaccDscaff1	40973282	19
S1_40973288	VaccDscaff1	40973288	19
S1_40973297	VaccDscaff1	40973297	19
S1_40973301	VaccDscaff1	40973301	19
S1_40973453	VaccDscaff1	40973453	20
S1_40973468	VaccDscaff1	40973468	20
S1_40973489	VaccDscaff1	40973489	20
S1_42675557	VaccDscaff1	42675557	21
S1_42675581	VaccDscaff1	42675581	21
S1_43627992	VaccDscaff1	43627992	22
S1_43628001	VaccDscaff1	43628001	22
S1_43628007	VaccDscaff1	43628007	22
S2_2782163	VaccDscaff2	2782163	23
S2_2782172	VaccDscaff2	2782172	23
S2_2889371	VaccDscaff2	2889371	24
S2_2889381	VaccDscaff2	2889381	24
S2_6386875	VaccDscaff2	6386875	25
S2_6386893	VaccDscaff2	6386893	25
S2_9052433	VaccDscaff2	9052433	26
S2_9052480	VaccDscaff2	9052480	26
S2_9052527	VaccDscaff2	9052527	26
S2_10387233	VaccDscaff2	10387233	27
S2_10387234	VaccDscaff2	10387234	27
S2_11181812	VaccDscaff2	11181812	28
S2_11181818	VaccDscaff2	11181818	28
S2_11181830	VaccDscaff2	11181830	28
S2_11276919	VaccDscaff2	11276919	29
S2_11276927	VaccDscaff2	11276927	29
S2_11276933	VaccDscaff2	11276933	29
S2_11653795	VaccDscaff2	11653795	30
S2_11653796	VaccDscaff2	11653796	30
S2_11653799	VaccDscaff2	11653799	30
S2_13720143	VaccDscaff2	13720143	31
S2_13720145	VaccDscaff2	13720145	31
S2_13720148	VaccDscaff2	13720148	31
S2_13721739	VaccDscaff2	13721739	32
S2_13721753	VaccDscaff2	13721753	32
S2_17242792	VaccDscaff2	17242792	33
S2_17242818	VaccDscaff2	17242818	33
S2_17242823	VaccDscaff2	17242823	33
S2_17522494	VaccDscaff2	17522494	34
S2_17522507	VaccDscaff2	17522507	34
S2_21038780	VaccDscaff2	21038780	35
S2_21038805	VaccDscaff2	21038805	35
S2_22472370	VaccDscaff2	22472370	36
S2_22472373	VaccDscaff2	22472373	36
S2_22472401	VaccDscaff2	22472401	36
S2_23606367	VaccDscaff2	23606367	37
S2_23606372	VaccDscaff2	23606372	37
S2_26269377	VaccDscaff2	26269377	38
S2_26269381	VaccDscaff2	26269381	38
S2_26269382	VaccDscaff2	26269382	38
S2_26936950	VaccDscaff2	26936950	39
S2_26936969	VaccDscaff2	26936969	39
S2_28699098	VaccDscaff2	28699098	40
S2_28699105	VaccDscaff2	28699105	40
S2_28699109	VaccDscaff2	28699109	40
S2_28699110	VaccDscaff2	28699110	40
S2_35602293	VaccDscaff2	35602293	41
S2_35602296	VaccDscaff2	35602296	41
S2_39072049	VaccDscaff2	39072049	42
S2_39072067	VaccDscaff2	39072067	42
S2_41087217	VaccDscaff2	41087217	43
S2_41087230	VaccDscaff2	41087230	43
S2_41087236	VaccDscaff2	41087236	43
S4_4609896	VaccDscaff4	4609896	44
S4_4609926	VaccDscaff4	4609926	44
S4_4610530	VaccDscaff4	4610530	44
S4_5747847	VaccDscaff4	5747847	45
S4_5747852	VaccDscaff4	5747852	45
S4_5747860	VaccDscaff4	5747860	45
S4_6159928	VaccDscaff4	6159928	46
S4_6159932	VaccDscaff4	6159932	46
S4_6159956	VaccDscaff4	6159956	46
S4_6159973	VaccDscaff4	6159973	46
S4_9322472	VaccDscaff4	9322472	47
S4_9322480	VaccDscaff4	9322480	47
S4_11895976	VaccDscaff4	11895976	48
S4_11895992	VaccDscaff4	11895992	48
S4_11896005	VaccDscaff4	11896005	48
S4_11967963	VaccDscaff4	11967963	49
S4_11967974	VaccDscaff4	11967974	49
S4_11967981	VaccDscaff4	11967981	49
S4_24834851	VaccDscaff4	24834851	50
S4_24834870	VaccDscaff4	24834870	50
S4_24834876	VaccDscaff4	24834876	50
S4_27894379	VaccDscaff4	27894379	51
S4_27894404	VaccDscaff4	27894404	51
S4_29208835	VaccDscaff4	29208835	52
S4_29208837	VaccDscaff4	29208837	52
S4_29208841	VaccDscaff4	29208841	52
S4_32638812	VaccDscaff4	32638812	53
S4_32638821	VaccDscaff4	32638821	53
S4_32697672	VaccDscaff4	32697672	54
S4_32697678	VaccDscaff4	32697678	54
S4_32697703	VaccDscaff4	32697703	54
S4_34281157	VaccDscaff4	34281157	55
S4_34281173	VaccDscaff4	34281173	55
S4_38957236	VaccDscaff4	38957236	56
S4_38957245	VaccDscaff4	38957245	56
S4_38957248	VaccDscaff4	38957248	56
S4_38957251	VaccDscaff4	38957251	56
S4_38957258	VaccDscaff4	38957258	56
S4_38957294	VaccDscaff4	38957294	56
S4_38957296	VaccDscaff4	38957296	56
S4_38957300	VaccDscaff4	38957300	56
S4_38957302	VaccDscaff4	38957302	56
S4_39028006	VaccDscaff4	39028006	57
S4_39028046	VaccDscaff4	39028046	57
S4_40758715	VaccDscaff4	40758715	58
S4_40758719	VaccDscaff4	40758719	58
S4_40758722	VaccDscaff4	40758722	58
S4_41103205	VaccDscaff4	41103205	59
S4_41103206	VaccDscaff4	41103206	59
S6_3997394	VaccDscaff6	3997394	60
S6_3997408	VaccDscaff6	3997408	60
S6_3997414	VaccDscaff6	3997414	60
S6_6465928	VaccDscaff6	6465928	61
S6_6465975	VaccDscaff6	6465975	61
S6_6801341	VaccDscaff6	6801341	62
S6_6801346	VaccDscaff6	6801346	62
S6_6974344	VaccDscaff6	6974344	63
S6_6974345	VaccDscaff6	6974345	63
S6_18306354	VaccDscaff6	18306354	64
S6_18306381	VaccDscaff6	18306381	64
S6_18672881	VaccDscaff6	18672881	65
S6_18672916	VaccDscaff6	18672916	65
S6_29568299	VaccDscaff6	29568299	66
S6_29568327	VaccDscaff6	29568327	66
S6_30553217	VaccDscaff6	30553217	67
S6_30553237	VaccDscaff6	30553237	67
S6_30553311	VaccDscaff6	30553311	67
S6_30962006	VaccDscaff6	30962006	68
S6_30962007	VaccDscaff6	30962007	68
S6_32076085	VaccDscaff6	32076085	69
S6_32076095	VaccDscaff6	32076095	69
S6_32076100	VaccDscaff6	32076100	69
S6_32076101	VaccDscaff6	32076101	69
S6_32076108	VaccDscaff6	32076108	69
S6_32085276	VaccDscaff6	32085276	70
S6_32085288	VaccDscaff6	32085288	70
S6_32085290	VaccDscaff6	32085290	70
S6_32085315	VaccDscaff6	32085315	70
S6_32085337	VaccDscaff6	32085337	70
S6_33578158	VaccDscaff6	33578158	71
S6_33578201	VaccDscaff6	33578201	71
S6_33578203	VaccDscaff6	33578203	71
S6_39457686	VaccDscaff6	39457686	72
S6_39457701	VaccDscaff6	39457701	72
S6_39457703	VaccDscaff6	39457703	72
S6_39457710	VaccDscaff6	39457710	72
S6_39457713	VaccDscaff6	39457713	72
S6_41829577	VaccDscaff6	41829577	73
S6_41829580	VaccDscaff6	41829580	73
S6_42676359	VaccDscaff6	42676359	74
S6_42676455	VaccDscaff6	42676455	74
S6_42676470	VaccDscaff6	42676470	74
S7_4267794	VaccDscaff7	4267794	75
S7_4267810	VaccDscaff7	4267810	75
S7_4267920	VaccDscaff7	4267920	75
S7_4267940	VaccDscaff7	4267940	75
S7_4267968	VaccDscaff7	4267968	75
S7_4458993	VaccDscaff7	4458993	76
S7_4459021	VaccDscaff7	4459021	76
S7_4459028	VaccDscaff7	4459028	76
S7_4459158	VaccDscaff7	4459158	77
S7_4459184	VaccDscaff7	4459184	77
S7_4459195	VaccDscaff7	4459195	77
S7_5391301	VaccDscaff7	5391301	78
S7_5391302	VaccDscaff7	5391302	78
S7_5391313	VaccDscaff7	5391313	78
S7_7249099	VaccDscaff7	7249099	79
S7_7249102	VaccDscaff7	7249102	79
S7_8731004	VaccDscaff7	8731004	80
S7_8731018	VaccDscaff7	8731018	80
S7_8731026	VaccDscaff7	8731026	81
S7_8731037	VaccDscaff7	8731037	81
S7_8731114	VaccDscaff7	8731114	82
S7_8731116	VaccDscaff7	8731116	82
S7_9855690	VaccDscaff7	9855690	83
S7_9855693	VaccDscaff7	9855693	83
S7_9855719	VaccDscaff7	9855719	83
S7_9996074	VaccDscaff7	9996074	84
S7_9996088	VaccDscaff7	9996088	84
S7_10361882	VaccDscaff7	10361882	85
S7_10361886	VaccDscaff7	10361886	85
S7_10362597	VaccDscaff7	10362597	86
S7_10362603	VaccDscaff7	10362603	86
S7_10362633	VaccDscaff7	10362633	86
S7_10362637	VaccDscaff7	10362637	86
S7_10362654	VaccDscaff7	10362654	86
S7_10362660	VaccDscaff7	10362660	86
S7_10362677	VaccDscaff7	10362677	86
S7_10799513	VaccDscaff7	10799513	87
S7_10799517	VaccDscaff7	10799517	87
S7_21975980	VaccDscaff7	21975980	88
S7_21976076	VaccDscaff7	21976076	88
S7_21980078	VaccDscaff7	21980078	88
S7_21980086	VaccDscaff7	21980086	88
S7_34449507	VaccDscaff7	34449507	89
S7_34449534	VaccDscaff7	34449534	89
S7_34449538	VaccDscaff7	34449538	89
S7_34518533	VaccDscaff7	34518533	90
S7_34518536	VaccDscaff7	34518536	90
S7_34518567	VaccDscaff7	34518567	91
S7_34518577	VaccDscaff7	34518577	91
S7_40168094	VaccDscaff7	40168094	92
S7_40168106	VaccDscaff7	40168106	92
S7_41401280	VaccDscaff7	41401280	93
S7_41401369	VaccDscaff7	41401369	93
S11_477712	VaccDscaff11	477712	94
S11_477724	VaccDscaff11	477724	94
S11_5729181	VaccDscaff11	5729181	95
S11_5729188	VaccDscaff11	5729188	95
S11_5729208	VaccDscaff11	5729208	95
S11_13824643	VaccDscaff11	13824643	96
S11_13824649	VaccDscaff11	13824649	96
S11_13824652	VaccDscaff11	13824652	96
S11_19098515	VaccDscaff11	19098515	97
S11_19098525	VaccDscaff11	19098525	97
S11_22567557	VaccDscaff11	22567557	98
S11_22567567	VaccDscaff11	22567567	98
S11_26046970	VaccDscaff11	26046970	99
S11_26047059	VaccDscaff11	26047059	99
S11_28301453	VaccDscaff11	28301453	100
S11_28301481	VaccDscaff11	28301481	100
S11_28301482	VaccDscaff11	28301482	100
S11_28573528	VaccDscaff11	28573528	101
S11_28573543	VaccDscaff11	28573543	101
S11_28573575	VaccDscaff11	28573575	101
S11_29715657	VaccDscaff11	29715657	102
S11_29715660	VaccDscaff11	29715660	102
S11_29715690	VaccDscaff11	29715690	102
S11_30643449	VaccDscaff11	30643449	103
S11_30643474	VaccDscaff11	30643474	103
S11_30643480	VaccDscaff11	30643480	103
S11_31631907	VaccDscaff11	31631907	104
S11_31725761	VaccDscaff11	31725761	104
S11_31725782	VaccDscaff11	31725782	104
S11_33204733	VaccDscaff11	33204733	105
S11_33204741	VaccDscaff11	33204741	105
S11_33208138	VaccDscaff11	33208138	106
S11_33208139	VaccDscaff11	33208139	106
S11_33208143	VaccDscaff11	33208143	106
S11_35876614	VaccDscaff11	35876614	107
S11_35876615	VaccDscaff11	35876615	107
S11_39075781	VaccDscaff11	39075781	108
S11_39075782	VaccDscaff11	39075782	108
S11_39075796	VaccDscaff11	39075796	108
S11_39203286	VaccDscaff11	39203286	109
S11_39203303	VaccDscaff11	39203303	109
S12_5644549	VaccDscaff12	5644549	110
S12_5644759	VaccDscaff12	5644759	110
S12_5824350	VaccDscaff12	5824350	111
S12_5824374	VaccDscaff12	5824374	111
S12_12705224	VaccDscaff12	12705224	112
S12_12705259	VaccDscaff12	12705259	112
S12_13683120	VaccDscaff12	13683120	113
S12_13683126	VaccDscaff12	13683126	113
S12_13745428	VaccDscaff12	13745428	114
S12_13745434	VaccDscaff12	13745434	114
S12_13745449	VaccDscaff12	13745449	114
S12_13885105	VaccDscaff12	13885105	115
S12_13885122	VaccDscaff12	13885122	115
S12_13888507	VaccDscaff12	13888507	115
S12_16869002	VaccDscaff12	16869002	116
S12_16869005	VaccDscaff12	16869005	116
S12_16869029	VaccDscaff12	16869029	116
S12_21142746	VaccDscaff12	21142746	117
S12_21142765	VaccDscaff12	21142765	117
S12_21142768	VaccDscaff12	21142768	117
S12_26955537	VaccDscaff12	26955537	118
S12_26955541	VaccDscaff12	26955541	118
S12_30247215	VaccDscaff12	30247215	119
S12_30247219	VaccDscaff12	30247219	119
S12_30247220	VaccDscaff12	30247220	119
S12_30247221	VaccDscaff12	30247221	119
S12_30247240	VaccDscaff12	30247240	119
S12_31404236	VaccDscaff12	31404236	120
S12_31404237	VaccDscaff12	31404237	120
S12_31404238	VaccDscaff12	31404238	120
S12_32836722	VaccDscaff12	32836722	121
S12_32836784	VaccDscaff12	32836784	121
S12_32836803	VaccDscaff12	32836803	121
S12_38521745	VaccDscaff12	38521745	122
S12_38521765	VaccDscaff12	38521765	122
S12_38521768	VaccDscaff12	38521768	122
S12_38969418	VaccDscaff12	38969418	123
S12_38969451	VaccDscaff12	38969451	123
S13_986173	VaccDscaff13	986173	124
S13_986203	VaccDscaff13	986203	124
S13_3825632	VaccDscaff13	3825632	125
S13_3825650	VaccDscaff13	3825650	125
S13_8410279	VaccDscaff13	8410279	126
S13_8410404	VaccDscaff13	8410404	126
S13_8579829	VaccDscaff13	8579829	127
S13_8579847	VaccDscaff13	8579847	127
S13_8579871	VaccDscaff13	8579871	127
S13_8579886	VaccDscaff13	8579886	127
S13_8579916	VaccDscaff13	8579916	127
S13_9900220	VaccDscaff13	9900220	128
S13_9900223	VaccDscaff13	9900223	128
S13_10818986	VaccDscaff13	10818986	129
S13_10819002	VaccDscaff13	10819002	129
S13_10819010	VaccDscaff13	10819010	129
S13_11238235	VaccDscaff13	11238235	130
S13_11238242	VaccDscaff13	11238242	130
S13_11238286	VaccDscaff13	11238286	130
S13_22486747	VaccDscaff13	22486747	131
S13_22486771	VaccDscaff13	22486771	131
S13_26476810	VaccDscaff13	26476810	132
S13_26476868	VaccDscaff13	26476868	132
S13_28960277	VaccDscaff13	28960277	133
S13_28960285	VaccDscaff13	28960285	133
S13_28960287	VaccDscaff13	28960287	133
S13_28960313	VaccDscaff13	28960313	134
S13_28960315	VaccDscaff13	28960315	134
S13_31515989	VaccDscaff13	31515989	135
S13_31516010	VaccDscaff13	31516010	135
S13_31516026	VaccDscaff13	31516026	135
S13_31981242	VaccDscaff13	31981242	136
S13_31981262	VaccDscaff13	31981262	136
S13_33116111	VaccDscaff13	33116111	137
S13_33116128	VaccDscaff13	33116128	137
S13_33202856	VaccDscaff13	33202856	138
S13_33202865	VaccDscaff13	33202865	138
S13_34639964	VaccDscaff13	34639964	139
S13_34639983	VaccDscaff13	34639983	139
S13_36121668	VaccDscaff13	36121668	140
S13_36121669	VaccDscaff13	36121669	140
S13_36286702	VaccDscaff13	36286702	141
S13_36286764	VaccDscaff13	36286764	141
S13_36286800	VaccDscaff13	36286800	142
S13_36286831	VaccDscaff13	36286831	142
S17_334923	VaccDscaff17	334923	143
S17_334941	VaccDscaff17	334941	143
S17_334953	VaccDscaff17	334953	143
S17_335091	VaccDscaff17	335091	143
S17_590003	VaccDscaff17	590003	144
S17_590061	VaccDscaff17	590061	144
S17_730269	VaccDscaff17	730269	145
S17_735043	VaccDscaff17	735043	145
S17_735052	VaccDscaff17	735052	145
S17_934697	VaccDscaff17	934697	146
S17_934729	VaccDscaff17	934729	146
S17_4987250	VaccDscaff17	4987250	147
S17_4987251	VaccDscaff17	4987251	147
S17_5527620	VaccDscaff17	5527620	148
S17_5527697	VaccDscaff17	5527697	148
S17_5527702	VaccDscaff17	5527702	148
S17_5527717	VaccDscaff17	5527717	148
S17_7980059	VaccDscaff17	7980059	149
S17_7980090	VaccDscaff17	7980090	149
S17_7980098	VaccDscaff17	7980098	149
S17_7980123	VaccDscaff17	7980123	149
S17_11173210	VaccDscaff17	11173210	150
S17_11173224	VaccDscaff17	11173224	150
S17_11173233	VaccDscaff17	11173233	150
S17_11553178	VaccDscaff17	11553178	151
S17_11553304	VaccDscaff17	11553304	151
S17_11691919	VaccDscaff17	11691919	152
S17_11691921	VaccDscaff17	11691921	152
S17_15572577	VaccDscaff17	15572577	153
S17_15572600	VaccDscaff17	15572600	153
S17_15742367	VaccDscaff17	15742367	154
S17_15742627	VaccDscaff17	15742627	154
S17_20087353	VaccDscaff17	20087353	155
S17_20087357	VaccDscaff17	20087357	155
S17_20087361	VaccDscaff17	20087361	155
S17_20087366	VaccDscaff17	20087366	156
S17_20087369	VaccDscaff17	20087369	156
S17_21798077	VaccDscaff17	21798077	157
S17_21798086	VaccDscaff17	21798086	157
S17_24693545	VaccDscaff17	24693545	158
S17_24693623	VaccDscaff17	24693623	158
S17_24693626	VaccDscaff17	24693626	158
S17_25233775	VaccDscaff17	25233775	159
S17_25233794	VaccDscaff17	25233794	159
S17_25233798	VaccDscaff17	25233798	159
S17_27094898	VaccDscaff17	27094898	160
S17_27094905	VaccDscaff17	27094905	160
S17_27094907	VaccDscaff17	27094907	160
S17_27094914	VaccDscaff17	27094914	160
S17_32247577	VaccDscaff17	32247577	161
S17_32247585	VaccDscaff17	32247585	161
S17_32247593	VaccDscaff17	32247593	161
S17_32247594	VaccDscaff17	32247594	161
S17_32247617	VaccDscaff17	32247617	161
S17_37076103	VaccDscaff17	37076103	162
S17_37076112	VaccDscaff17	37076112	162
S17_37076131	VaccDscaff17	37076131	162
S17_38145985	VaccDscaff17	38145985	163
S17_38145998	VaccDscaff17	38145998	163
S17_38146013	VaccDscaff17	38146013	163
S20_655805	VaccDscaff20	655805	164
S20_655826	VaccDscaff20	655826	164
S20_3132984	VaccDscaff20	3132984	165
S20_3133007	VaccDscaff20	3133007	165
S20_4059717	VaccDscaff20	4059717	166
S20_4059719	VaccDscaff20	4059719	166
S20_4851774	VaccDscaff20	4851774	167
S20_4851822	VaccDscaff20	4851822	167
S20_7866847	VaccDscaff20	7866847	168
S20_7866871	VaccDscaff20	7866871	168
S20_7866876	VaccDscaff20	7866876	168
S20_8191630	VaccDscaff20	8191630	169
S20_8191642	VaccDscaff20	8191642	169
S20_8191643	VaccDscaff20	8191643	169
S20_8191654	VaccDscaff20	8191654	169
S20_8191658	VaccDscaff20	8191658	169
S20_8191659	VaccDscaff20	8191659	169
S20_8191666	VaccDscaff20	8191666	169
S20_8191672	VaccDscaff20	8191672	169
S20_10056925	VaccDscaff20	10056925	170
S20_10056935	VaccDscaff20	10056935	170
S20_11837028	VaccDscaff20	11837028	171
S20_11840039	VaccDscaff20	11840039	171
S20_18639526	VaccDscaff20	18639526	172
S20_18639539	VaccDscaff20	18639539	172
S20_22977996	VaccDscaff20	22977996	173
S20_22978066	VaccDscaff20	22978066	173
S20_32267717	VaccDscaff20	32267717	174
S20_32267720	VaccDscaff20	32267720	174
S20_32267732	VaccDscaff20	32267732	174
S20_32267737	VaccDscaff20	32267737	174
S20_33665847	VaccDscaff20	33665847	175
S20_33665875	VaccDscaff20	33665875	175
S21_43096	VaccDscaff21	43096	176
S21_43101	VaccDscaff21	43101	176
S21_43136	VaccDscaff21	43136	176
S21_1362537	VaccDscaff21	1362537	177
S21_1362538	VaccDscaff21	1362538	177
S21_1362555	VaccDscaff21	1362555	177
S21_1680996	VaccDscaff21	1680996	178
S21_1682854	VaccDscaff21	1682854	178
S21_1682912	VaccDscaff21	1682912	179
S21_1682913	VaccDscaff21	1682913	179
S21_2758161	VaccDscaff21	2758161	180
S21_2758163	VaccDscaff21	2758163	180
S21_3337746	VaccDscaff21	3337746	181
S21_3337753	VaccDscaff21	3337753	181
S21_3337755	VaccDscaff21	3337755	181
S21_3337819	VaccDscaff21	3337819	181
S21_4965231	VaccDscaff21	4965231	182
S21_4965238	VaccDscaff21	4965238	182
S21_6255741	VaccDscaff21	6255741	183
S21_6255778	VaccDscaff21	6255778	183
S21_6387739	VaccDscaff21	6387739	184
S21_6387740	VaccDscaff21	6387740	184
S21_8691129	VaccDscaff21	8691129	185
S21_8691139	VaccDscaff21	8691139	185
S21_12491177	VaccDscaff21	12491177	186
S21_12491178	VaccDscaff21	12491178	186
S21_18794270	VaccDscaff21	18794270	187
S21_18794283	VaccDscaff21	18794283	187
S21_21280882	VaccDscaff21	21280882	188
S21_21280975	VaccDscaff21	21280975	188
S21_23972577	VaccDscaff21	23972577	189
S21_23972592	VaccDscaff21	23972592	189
S21_23972596	VaccDscaff21	23972596	189
S21_24110933	VaccDscaff21	24110933	190
S21_24110940	VaccDscaff21	24110940	190
S21_30335382	VaccDscaff21	30335382	191
S21_30335391	VaccDscaff21	30335391	191
S21_32619905	VaccDscaff21	32619905	192
S21_32619935	VaccDscaff21	32619935	192
S21_32619950	VaccDscaff21	32619950	192
S21_33537076	VaccDscaff21	33537076	193
S21_33537082	VaccDscaff21	33537082	193
S21_33537094	VaccDscaff21	33537094	193
S21_33537168	VaccDscaff21	33537168	194
S21_33537175	VaccDscaff21	33537175	194
S21_33537302	VaccDscaff21	33537302	194
S21_36829713	VaccDscaff21	36829713	195
S21_36829727	VaccDscaff21	36829727	195
S21_36829738	VaccDscaff21	36829738	195
S21_36829743	VaccDscaff21	36829743	195
S21_37130345	VaccDscaff21	37130345	196
S21_37130383	VaccDscaff21	37130383	196
S21_37130421	VaccDscaff21	37130421	196
S21_37312624	VaccDscaff21	37312624	197
S21_37312628	VaccDscaff21	37312628	197
S21_37315044	VaccDscaff21	37315044	197
S21_37315050	VaccDscaff21	37315050	197
S21_37315051	VaccDscaff21	37315051	197
S21_37315052	VaccDscaff21	37315052	197
S21_37315059	VaccDscaff21	37315059	197
S21_37315077	VaccDscaff21	37315077	197
S21_37315081	VaccDscaff21	37315081	197
S21_37315083	VaccDscaff21	37315083	197
S21_37315089	VaccDscaff21	37315089	197
S21_37315135	VaccDscaff21	37315135	197
S21_37315164	VaccDscaff21	37315164	198
S21_37315331	VaccDscaff21	37315331	198
S21_37315332	VaccDscaff21	37315332	198
S21_37315349	VaccDscaff21	37315349	198
S21_37315358	VaccDscaff21	37315358	198
S22_62798	VaccDscaff22	62798	199
S22_62882	VaccDscaff22	62882	199
S22_225605	VaccDscaff22	225605	200
S22_225617	VaccDscaff22	225617	200
S22_1693508	VaccDscaff22	1693508	201
S22_1693509	VaccDscaff22	1693509	201
S22_2802980	VaccDscaff22	2802980	202
S22_2802998	VaccDscaff22	2802998	202
S22_2803009	VaccDscaff22	2803009	202
S22_2803010	VaccDscaff22	2803010	202
S22_2803012	VaccDscaff22	2803012	202
S22_7240696	VaccDscaff22	7240696	203
S22_7240699	VaccDscaff22	7240699	203
S22_11070841	VaccDscaff22	11070841	204
S22_11070875	VaccDscaff22	11070875	204
S22_26981892	VaccDscaff22	26981892	205
S22_26981893	VaccDscaff22	26981893	205
S22_27290432	VaccDscaff22	27290432	206
S22_27290465	VaccDscaff22	27290465	206
S22_27290476	VaccDscaff22	27290476	206
S22_28415934	VaccDscaff22	28415934	207
S22_28415952	VaccDscaff22	28415952	207
S22_28415967	VaccDscaff22	28415967	207
S22_32274440	VaccDscaff22	32274440	208
S22_32274470	VaccDscaff22	32274470	208
S22_32274492	VaccDscaff22	32274492	208
S22_35107374	VaccDscaff22	35107374	209
S22_35107412	VaccDscaff22	35107412	209
S22_35107417	VaccDscaff22	35107417	209
S22_35107419	VaccDscaff22	35107419	209
